# Supplementary material for: Inequalities in the risk and prevention of invasive meningococcal disease in the United States – A systematic literature review
Source: PubMed Central journal article supplement — Hum Vaccin Immunother. 2024 Oct 7;20(1):2406613. doi: 10.1080/21645515.2024.2406613 (PMC11459729; doi:10.1080/21645515.2024.2406613), 2024-10-07
Supplement: KHVI_A_2406613_SM5709.pdf [file KHVI_A_2406613_SM5709.pdf]

1 Supplementary material

2 Figure S1. Dahlgren & Whitehead (1991) model of the  
3 determinants of health <sup>13</sup>

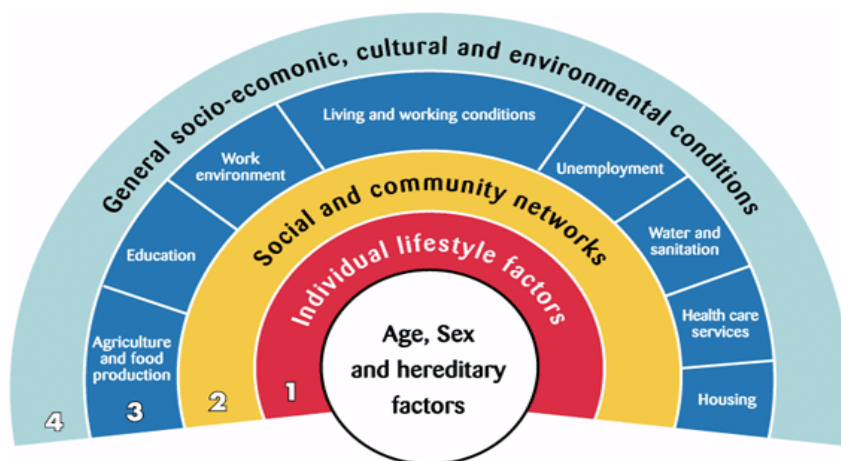

Dahlgren, G. (1995)  
European Health Policy Conference:  
Opportunities for the Future. Vol 11 - Intersectoral Action for Health.  
Copenhagen: WHO Regional Office for Europe

4  
5

6 Table S1. Search strategy (Embase example)

|    | <b>Search Terms</b>                                                                                                                                                                                                                                                                                                                                                                                                                                                                                                                                                                                                                                                                                                                                                                                                                                                                                                                               | <b>Results</b> |
|----|---------------------------------------------------------------------------------------------------------------------------------------------------------------------------------------------------------------------------------------------------------------------------------------------------------------------------------------------------------------------------------------------------------------------------------------------------------------------------------------------------------------------------------------------------------------------------------------------------------------------------------------------------------------------------------------------------------------------------------------------------------------------------------------------------------------------------------------------------------------------------------------------------------------------------------------------------|----------------|
| 1  | exp meningococcosis/ or exp meningitis/                                                                                                                                                                                                                                                                                                                                                                                                                                                                                                                                                                                                                                                                                                                                                                                                                                                                                                           | 116492         |
| 2  | ((meningococcal or meningococcic or meningococcus or meningitidis) adj2 (disease\$ or infection\$ or meningitis or septic or sepsis or septic?emia or macteremia)) or meningococc?emia or (meningitis not viral\$)).ti,ab.                                                                                                                                                                                                                                                                                                                                                                                                                                                                                                                                                                                                                                                                                                                        | 64378          |
| 3  | 1 and 2                                                                                                                                                                                                                                                                                                                                                                                                                                                                                                                                                                                                                                                                                                                                                                                                                                                                                                                                           | 51749          |
| 4  | ((cryptococcal or cryptococcosis or cryptococcus or tuberculous or tuberculosis or tubercular or pneumococcal) adj2 meningitis).ti,ab.                                                                                                                                                                                                                                                                                                                                                                                                                                                                                                                                                                                                                                                                                                                                                                                                            | 10652          |
| 5  | 3 not 4                                                                                                                                                                                                                                                                                                                                                                                                                                                                                                                                                                                                                                                                                                                                                                                                                                                                                                                                           | 42684          |
| 6  | exp sex factor/                                                                                                                                                                                                                                                                                                                                                                                                                                                                                                                                                                                                                                                                                                                                                                                                                                                                                                                                   | 13238          |
| 7  | (sex-based or sex-related).ti,ab.                                                                                                                                                                                                                                                                                                                                                                                                                                                                                                                                                                                                                                                                                                                                                                                                                                                                                                                 | 12917          |
| 8  | ((sex or sex) adj2 (analysis or specific or difference? or factor? or inequit\$ or disparit\$ or inequalit\$)).ti,ab.                                                                                                                                                                                                                                                                                                                                                                                                                                                                                                                                                                                                                                                                                                                                                                                                                             | 190304         |
| 9  | exp geriatrics/                                                                                                                                                                                                                                                                                                                                                                                                                                                                                                                                                                                                                                                                                                                                                                                                                                                                                                                                   | 40052          |
| 10 | ((ethnic\$ or race or racial or religio\$ or cultur\$ or minorit\$ or refugee or indigenous or aboriginal) adj3 (analysis or difference\$ or specific or disparit\$ or inequalit\$ or inequit\$)).ti,ab.                                                                                                                                                                                                                                                                                                                                                                                                                                                                                                                                                                                                                                                                                                                                          | 108129         |
| 11 | ((poverty or low-income or socioeconomic\$ or social or structural conflict) adj2 (analysis or disadvantage\$ or specific or difference? or factor? or inequalit\$ or depriv\$ or inequit\$ or disparit\$)).ti,ab.                                                                                                                                                                                                                                                                                                                                                                                                                                                                                                                                                                                                                                                                                                                                | 74295          |
| 12 | exp Educational Status/                                                                                                                                                                                                                                                                                                                                                                                                                                                                                                                                                                                                                                                                                                                                                                                                                                                                                                                           | 117136         |
| 13 | exp family size/                                                                                                                                                                                                                                                                                                                                                                                                                                                                                                                                                                                                                                                                                                                                                                                                                                                                                                                                  | 19709          |
| 14 | ((family or household) adj2 size).ti,ab.                                                                                                                                                                                                                                                                                                                                                                                                                                                                                                                                                                                                                                                                                                                                                                                                                                                                                                          | 6651           |
| 15 | exp economic inequality/                                                                                                                                                                                                                                                                                                                                                                                                                                                                                                                                                                                                                                                                                                                                                                                                                                                                                                                          | 781            |
| 16 | ((economic or financial or income or wealth) adj2 (disparit\$ or inequit\$ or inequalit\$)).ti,ab.                                                                                                                                                                                                                                                                                                                                                                                                                                                                                                                                                                                                                                                                                                                                                                                                                                                | 6091           |
| 17 | exp crime/                                                                                                                                                                                                                                                                                                                                                                                                                                                                                                                                                                                                                                                                                                                                                                                                                                                                                                                                        | 95136          |
| 18 | (crime\$ or criminal\$ or convict\$ or incarcerat\$ or prison\$ or jail\$ or misdemeanor\$ or felon\$).ti,ab.                                                                                                                                                                                                                                                                                                                                                                                                                                                                                                                                                                                                                                                                                                                                                                                                                                     | 89327          |
| 19 | exp occupation/ or exp named groups by occupation/                                                                                                                                                                                                                                                                                                                                                                                                                                                                                                                                                                                                                                                                                                                                                                                                                                                                                                | 2611447        |
| 20 | (occupation\$ or job\$ or career\$ or work\$).ti,ab.                                                                                                                                                                                                                                                                                                                                                                                                                                                                                                                                                                                                                                                                                                                                                                                                                                                                                              | 2518599        |
| 21 | exp health insurance/                                                                                                                                                                                                                                                                                                                                                                                                                                                                                                                                                                                                                                                                                                                                                                                                                                                                                                                             | 301044         |
| 22 | (competitive medical plan\$ or employee health benefit plan or for-profit insurance plan\$ or health benefit plan\$ or healthcare insurance or health insurance exchange\$ or health insurance or healthcare insurance or hospitalization insurance\$ or independent practice association\$ or medical insurance or managed care program\$ or medicare or medigap insurance or medicaid or not-for-profit insurance or nursing insurance or nursing services insurance or pharmaceutical insurance or pharmaceutical services insurance or pharmacy insurance or physician services insurance\$ or preferred provider\$ or prepaid healthcare or prepaid health plans or psychiatric insurance or sickness benefit or sickness insurance or single-payer system or surgery insurance or surgical insurance or universal health coverage or obamacare or drug coverage or uninsured\$ or underinsured\$ or under-insured\$ or un-insured\$).ti,ab. | 177136         |
| 23 | exp socioeconomics/                                                                                                                                                                                                                                                                                                                                                                                                                                                                                                                                                                                                                                                                                                                                                                                                                                                                                                                               | 1185244        |
| 24 | (economic value of life or indigent healthcare\$ or medical indigency or social economic aspect\$ or social economics or social-economic factor\$ or socio-economic aspect\$ or socio-economic factor\$ or socio-economics or socioeconomic aspect\$ or socioeconomic factor\$ or value of life or economic status or educational status or diploma\$ or degree\$ or drop-out\$ or dropout\$ or                                                                                                                                                                                                                                                                                                                                                                                                                                                                                                                                                   | 2580969        |

|    | Search Terms                                                                                                                                                                                                                                                                                                                                                                                                                                                                                                                                                                                                                                                                                                                                                                                                                                                                                                                                                                                                                                                                                                                                                                                                                                                                                                                                                                                                                                                                         | Results  |
|----|--------------------------------------------------------------------------------------------------------------------------------------------------------------------------------------------------------------------------------------------------------------------------------------------------------------------------------------------------------------------------------------------------------------------------------------------------------------------------------------------------------------------------------------------------------------------------------------------------------------------------------------------------------------------------------------------------------------------------------------------------------------------------------------------------------------------------------------------------------------------------------------------------------------------------------------------------------------------------------------------------------------------------------------------------------------------------------------------------------------------------------------------------------------------------------------------------------------------------------------------------------------------------------------------------------------------------------------------------------------------------------------------------------------------------------------------------------------------------------------|----------|
|    | graduate\$ or literat\$ or numeracy or income group or pay equity or poverty or socioeconomic distribution).ti,ab.                                                                                                                                                                                                                                                                                                                                                                                                                                                                                                                                                                                                                                                                                                                                                                                                                                                                                                                                                                                                                                                                                                                                                                                                                                                                                                                                                                   |          |
| 25 | ((discriminat\$ or social exclu\$ or social inclu\$) adj3 (religion or culture or race or racial or aboriginal or indigenous or ethnic\$)).ti,ab.                                                                                                                                                                                                                                                                                                                                                                                                                                                                                                                                                                                                                                                                                                                                                                                                                                                                                                                                                                                                                                                                                                                                                                                                                                                                                                                                    | 3162     |
| 26 | ((urban or rural or inner-city or slum) adj2 (difference\$ or specific or analysis or inequit\$ or disparit\$ or inequalit\$)).ti,ab.                                                                                                                                                                                                                                                                                                                                                                                                                                                                                                                                                                                                                                                                                                                                                                                                                                                                                                                                                                                                                                                                                                                                                                                                                                                                                                                                                | 6535     |
| 27 | ((treatment\$ or vaccin\$) adj3 (inequit\$ or disparit\$ or inequalit\$ or access or utilisation or utilization)).ti,ab.                                                                                                                                                                                                                                                                                                                                                                                                                                                                                                                                                                                                                                                                                                                                                                                                                                                                                                                                                                                                                                                                                                                                                                                                                                                                                                                                                             | 24380    |
| 28 | (inequalit\$ or inequit\$ or disparit\$ or (risk adj2 factor\$) or driver\$).mp.                                                                                                                                                                                                                                                                                                                                                                                                                                                                                                                                                                                                                                                                                                                                                                                                                                                                                                                                                                                                                                                                                                                                                                                                                                                                                                                                                                                                     | 1923360  |
| 29 | ((physical disability\$ or mental health or mental illness or child* development) adj2 (disparit\$ or inequalit\$ or inequit\$)).ti,ab.                                                                                                                                                                                                                                                                                                                                                                                                                                                                                                                                                                                                                                                                                                                                                                                                                                                                                                                                                                                                                                                                                                                                                                                                                                                                                                                                              | 1424     |
| 30 | or/6-29                                                                                                                                                                                                                                                                                                                                                                                                                                                                                                                                                                                                                                                                                                                                                                                                                                                                                                                                                                                                                                                                                                                                                                                                                                                                                                                                                                                                                                                                              | 9206970  |
| 31 | 5 and 30                                                                                                                                                                                                                                                                                                                                                                                                                                                                                                                                                                                                                                                                                                                                                                                                                                                                                                                                                                                                                                                                                                                                                                                                                                                                                                                                                                                                                                                                             | 10492    |
| 32 | 31 not ((exp animal/ or nonhuman/) not exp human/)                                                                                                                                                                                                                                                                                                                                                                                                                                                                                                                                                                                                                                                                                                                                                                                                                                                                                                                                                                                                                                                                                                                                                                                                                                                                                                                                                                                                                                   | 10251    |
| 33 | (case report or case series or woman or man or child or adolescent or female or male or boy or girl or infant).ti.                                                                                                                                                                                                                                                                                                                                                                                                                                                                                                                                                                                                                                                                                                                                                                                                                                                                                                                                                                                                                                                                                                                                                                                                                                                                                                                                                                   | 999263   |
| 34 | case reports/ or case study/ or case report\$.jx. or case report\$.jw.                                                                                                                                                                                                                                                                                                                                                                                                                                                                                                                                                                                                                                                                                                                                                                                                                                                                                                                                                                                                                                                                                                                                                                                                                                                                                                                                                                                                               | 183345   |
| 35 | (Ephemera or "Introductory Journal Article" or News or "Newspaper Article" or Editorial or Comment or Overall).pt. or in vitro Techniques/ or in vitro study/ or (commentary or editorial or comment or letter or mice or rat or mouse or animal or murine).ti.                                                                                                                                                                                                                                                                                                                                                                                                                                                                                                                                                                                                                                                                                                                                                                                                                                                                                                                                                                                                                                                                                                                                                                                                                      | 3532781  |
| 36 | review.pt. not (systematic or (meta and analy*) or ((indirect or mixed) and 'treatment comparison')).ti,ab.                                                                                                                                                                                                                                                                                                                                                                                                                                                                                                                                                                                                                                                                                                                                                                                                                                                                                                                                                                                                                                                                                                                                                                                                                                                                                                                                                                          | 2723782  |
| 37 | or/33-36                                                                                                                                                                                                                                                                                                                                                                                                                                                                                                                                                                                                                                                                                                                                                                                                                                                                                                                                                                                                                                                                                                                                                                                                                                                                                                                                                                                                                                                                             | 7213498  |
| 38 | 32 not 37                                                                                                                                                                                                                                                                                                                                                                                                                                                                                                                                                                                                                                                                                                                                                                                                                                                                                                                                                                                                                                                                                                                                                                                                                                                                                                                                                                                                                                                                            | 7886     |
| 39 | conference abstract.pt.                                                                                                                                                                                                                                                                                                                                                                                                                                                                                                                                                                                                                                                                                                                                                                                                                                                                                                                                                                                                                                                                                                                                                                                                                                                                                                                                                                                                                                                              | 4494927  |
| 40 | 38 not 39                                                                                                                                                                                                                                                                                                                                                                                                                                                                                                                                                                                                                                                                                                                                                                                                                                                                                                                                                                                                                                                                                                                                                                                                                                                                                                                                                                                                                                                                            | 5262     |
| 41 | (Andorra or Antigua or Barbuda or Aruba or Australia or Austria or Bahamas or Bahrain or Barbados or Belgium or Bermuda or British Virgin Islands or Brunei Darussalam or Canada or Cayman Islands or Channel Islands or Chile or Croatia or Curacao or Cyprus or Czech Republic or Denmark or Estonia or Faroe Islands or Finland or France or French Polynesia or Germany or Gibraltar or Greece or Greenland or Guam or Hong Kong or Hungary or Iceland or Ireland or Isle of Man or Israel or Italy or Japan or Korea or Kuwait or Latvia or Liechtenstein or Lithuania or Luxembourg or Macao or Malta or Monaco or Nauru or Netherlands or New Caledonia or New Zealand or Northern Mariana Islands or Norway or Oman or Palau or Poland or Portugal or Puerto Rico or Qatar or San Marino or Saudi Arabia or Seychelles or Singapore or Sint Maarten or Slovak Republic or Slovenia or Spain or "St. Kitts and Nevis" or "St. Martin" or Sweden or Switzerland or Taiwan or Trinidad or Tobago or "Turks and Caicos" or United Arab Emirates or United Kingdom or United States or Uruguay or Virgin Islands or Latin America\$ or Belize or Costa Rica or El Salvador or Guatemala or Honduras or Mexico or Nicaragua or Panama or Argentina or Bolivia or Brazil or Colombia or Ecuador or French Guiana or Guyana or Paraguay or Peru or Suriname or Venezuela or Cuba or Dominican Republic or Haiti or Guadeloupe or Martinique or Saint-Barthelemy or Saint-Martin).af. | 35324928 |
| 42 | exp africa/ or (Afghanistan or Burkina Faso or Burundi or Central African Republic or Chad or Congo or Eritrea or Ethiopia or Gambia or Guinea or Guinea-Bissau or Korea or Liberia or Madagascar or Malawi or Mali or Mozambique or Niger or Rwanda or Sierra Leone or Somalia or Sudan or Syrian Arab Republic or Togo or Uganda or Yemen or Angola or Algeria or Bangladesh or Benin or Bhutan or Cabo Verde or Cambodia or Cameroon or Comoros or Congo or Cote d'Ivoire or Djibouti or Egypt or Eswatini or Ghana or India or                                                                                                                                                                                                                                                                                                                                                                                                                                                                                                                                                                                                                                                                                                                                                                                                                                                                                                                                                   | 1506736  |

|    | <b>Search Terms</b>                                                                                                                                                                                                                                                                                                                                                                                                                                                                                                                                                                                                                                                                                                                                                                                                                                                                                                                                                                                      | <b>Results</b> |
|----|----------------------------------------------------------------------------------------------------------------------------------------------------------------------------------------------------------------------------------------------------------------------------------------------------------------------------------------------------------------------------------------------------------------------------------------------------------------------------------------------------------------------------------------------------------------------------------------------------------------------------------------------------------------------------------------------------------------------------------------------------------------------------------------------------------------------------------------------------------------------------------------------------------------------------------------------------------------------------------------------------------|----------------|
|    | Indonesia or Iran or Kenya or Kiribati or Kyrgyz Republic or Lesotho or Mauritania or Micronesia or Mongolia or Morocco or Myanmar or Nepal or Nigeria or Pakistan or Papua New Guinea or Philippines or Samoa or "Sao Tome and Principe" or Senegal or Solomon Islands or Sri Lanka or Tanzania or Tajikistan or Timor-Leste or Tunisia or Ukraine or Uzbekistan or Vanuatu or Vietnam or "West Bank and Gaza" or Zambia or Zimbabwe or Albania or American Samoa or Armenia or Azerbaijan or Belarus or "Bosnia and Herzegovina" or Botswana or Bulgaria or China or Dominica or Equatorial Guinea or Fiji or Gabon or Grenada or Guyana or Iraq or Jamaica or Jordan or Kazakhstan or Kosovo or Lebanon or Libya or Malaysia or Maldives or Marshall Islands or Mauritius or Moldova or Montenegro or Namibia or North Macedonia or Romania or Russia\$ or Serbia or South Africa or "St. Lucia" or "St. Vincent and the Grenadines" or Thailand or Tonga or Turkey or Turkmenistan or Tuvalu).ti,ab. |                |
| 43 | 41 not 42                                                                                                                                                                                                                                                                                                                                                                                                                                                                                                                                                                                                                                                                                                                                                                                                                                                                                                                                                                                                | 34120916       |
| 44 | 40 and 43                                                                                                                                                                                                                                                                                                                                                                                                                                                                                                                                                                                                                                                                                                                                                                                                                                                                                                                                                                                                | 4196           |
| 45 | limit 44 to yr="2012 -Current"                                                                                                                                                                                                                                                                                                                                                                                                                                                                                                                                                                                                                                                                                                                                                                                                                                                                                                                                                                           | 1751           |

7

8

9 Table S2. PECOS criteria

|                        | Study Inclusion                                                                                                                                                                                                                                                                                                                                                                                                             |                                                                                                                                                                                                                                                                                                                                                                                                                             |                                                                                                                                                                                                                                                                                                                                                                                                                             | Study Exclusion                                                                                                                                                                                                                                        |
|------------------------|-----------------------------------------------------------------------------------------------------------------------------------------------------------------------------------------------------------------------------------------------------------------------------------------------------------------------------------------------------------------------------------------------------------------------------|-----------------------------------------------------------------------------------------------------------------------------------------------------------------------------------------------------------------------------------------------------------------------------------------------------------------------------------------------------------------------------------------------------------------------------|-----------------------------------------------------------------------------------------------------------------------------------------------------------------------------------------------------------------------------------------------------------------------------------------------------------------------------------------------------------------------------------------------------------------------------|--------------------------------------------------------------------------------------------------------------------------------------------------------------------------------------------------------------------------------------------------------|
|                        | IMD Risk                                                                                                                                                                                                                                                                                                                                                                                                                    | IMD Prevention (Engagement in Preventive Practices)                                                                                                                                                                                                                                                                                                                                                                         | IMD Control (Disease Control)                                                                                                                                                                                                                                                                                                                                                                                               |                                                                                                                                                                                                                                                        |
| <b>Population</b>      | <b>IMD cases or carriers and controls (susceptible or not infected) of all ages</b>                                                                                                                                                                                                                                                                                                                                         | <b>IMD cases or carriers and controls (susceptible or not infected) of all ages</b>                                                                                                                                                                                                                                                                                                                                         | <b>IMD cases, long-term survivors of IMD, caregivers of IMD cases and long-term survivors of all ages</b>                                                                                                                                                                                                                                                                                                                   | Populations not related to IMD or at-risk of IMD<br>Patients with influenza/bacterial infections caused by Haemophilus influenzae<br>Patients with pneumonia/bacterial infections caused by Streptococcus pneumoniae<br>Patients with viral meningitis |
|                        | IMD cases/carriers/IMD patient population would include adults/adolescents/children/infants with one or more of the following descriptions:<br>Patients with meningococcal disease/meningitis/ bacterial meningitis/meningococcaemia/septicaemia meningococcal sepsis/Waterhouse–Friderichsen syndrome<br>Patients with bacterial infections caused by Neisseria meningitidis<br>Patients with IMD caused by all serogroups | IMD cases/carriers/IMD patient population would include adults/adolescents/children/infants with one or more of the following descriptions:<br>Patients with meningococcal disease/meningitis/ bacterial meningitis/meningococcaemia/septicaemia meningococcal sepsis/Waterhouse–Friderichsen syndrome<br>Patients with bacterial infections caused by Neisseria meningitidis<br>Patients with IMD caused by all serogroups | IMD cases/carriers/IMD patient population would include adults/adolescents/children/infants with one or more of the following descriptions:<br>Patients with meningococcal disease/meningitis/ bacterial meningitis/meningococcaemia/septicaemia meningococcal sepsis/Waterhouse–Friderichsen syndrome<br>Patients with bacterial infections caused by Neisseria meningitidis<br>Patients with IMD caused by all serogroups |                                                                                                                                                                                                                                                        |
| <b>Exposure**</b><br>* | Exposures may have included, but were not limited to: social, economic, environmental, and other factors of health including the following:<br>Person’s individual characteristics and behaviors:                                                                                                                                                                                                                           | Mental health<br>Age<br>Exposure to crime and violence<br>Social and economic factors:<br>Social deprivation<br>Wealth                                                                                                                                                                                                                                                                                                      | Working life conditions<br>Basic amenities<br>Unemployment and job security<br>Food security<br>Early childhood development<br>Structural conflict                                                                                                                                                                                                                                                                          | Exposures that were not considered as factors that attribute to inequalities of health                                                                                                                                                                 |

|                   |                                                                                                                                                                                                                                                                             |                                                                                                                                                                                                                               |                                                                                                                                                                                                                                                                                                                                                                                                                                                                                                                                                                                                                                                                                                                                                                                                                                                                                                                                                                   |                                                                                                                                                                                                                           |
|-------------------|-----------------------------------------------------------------------------------------------------------------------------------------------------------------------------------------------------------------------------------------------------------------------------|-------------------------------------------------------------------------------------------------------------------------------------------------------------------------------------------------------------------------------|-------------------------------------------------------------------------------------------------------------------------------------------------------------------------------------------------------------------------------------------------------------------------------------------------------------------------------------------------------------------------------------------------------------------------------------------------------------------------------------------------------------------------------------------------------------------------------------------------------------------------------------------------------------------------------------------------------------------------------------------------------------------------------------------------------------------------------------------------------------------------------------------------------------------------------------------------------------------|---------------------------------------------------------------------------------------------------------------------------------------------------------------------------------------------------------------------------|
|                   | Ethnicity<br>Sex/sexual orientation<br>Religion<br>Physical disability                                                                                                                                                                                                      | Socioeconomic status<br>Insurance status and type<br>Education level<br>Occupation                                                                                                                                            | Access to affordable health services of decent quality<br>Physical environment:<br>Geographic location/region<br>Housing and household size                                                                                                                                                                                                                                                                                                                                                                                                                                                                                                                                                                                                                                                                                                                                                                                                                       |                                                                                                                                                                                                                           |
| <b>Comparator</b> | Alternative levels within each exposure (e.g., rural/urban or differing levels of education). A “no comparator” was also to be used if applicable (e.g., employed vs. not employed)                                                                                         |                                                                                                                                                                                                                               |                                                                                                                                                                                                                                                                                                                                                                                                                                                                                                                                                                                                                                                                                                                                                                                                                                                                                                                                                                   | NA                                                                                                                                                                                                                        |
| <b>Outcomes</b>   | <p>Studies reporting on the association between exposures and IMD risk for any of the following outcomes:</p> <ul style="list-style-type: none"> <li>IMD incidence</li> <li>IMD prevalence</li> <li>Carriage</li> <li>Mortality</li> <li>Sequelae</li> <li>HRQoL</li> </ul> | <p>Studies reporting on differences in exposures in relation to the following outcomes:</p> <ul style="list-style-type: none"> <li>Vaccine uptake</li> <li>Vaccine adherence/Compliance</li> <li>Series completion</li> </ul> | <p>Studies reporting on differences in exposures in relation to the following outcomes s:</p> <ul style="list-style-type: none"> <li>HCRU due to complications during acute phase and due to long-term sequelae</li> <li>Hospitalisations</li> <li>ICU visits</li> <li>ER visits</li> <li>Outpatient care</li> <li>Specialist visits</li> <li>Differences in access to healthcare services for survivors and caregivers including, but not limited to, the following: <ul style="list-style-type: none"> <li>Age-specific</li> <li>Sex-related</li> <li>Racial and ethnic</li> <li>Cost and affordability</li> <li>Geography/location related</li> <li>Insurance status and insurance type</li> </ul> </li> <li>Economic costs due to sequelae treatment for survivors and caregivers</li> <li>All direct costs including: <ul style="list-style-type: none"> <li>Treatment costs</li> <li>Medication costs</li> <li>Hospitalisation costs</li> </ul> </li> </ul> | <p>Publications that report the following type of outcomes</p> <ul style="list-style-type: none"> <li>Clinical efficacy</li> <li>Safety</li> <li>Effectiveness of treatments/vaccines</li> <li>Clinical burden</li> </ul> |

|                                               |                                                                                                                                                                                                                                                                                                                                                                                                                                                                                              |  |                                                                                                                                                                                       |                                                                                                                                                    |
|-----------------------------------------------|----------------------------------------------------------------------------------------------------------------------------------------------------------------------------------------------------------------------------------------------------------------------------------------------------------------------------------------------------------------------------------------------------------------------------------------------------------------------------------------------|--|---------------------------------------------------------------------------------------------------------------------------------------------------------------------------------------|----------------------------------------------------------------------------------------------------------------------------------------------------|
|                                               |                                                                                                                                                                                                                                                                                                                                                                                                                                                                                              |  | Other medical services costs<br>All indirect costs including:<br>Special education costs<br>Productivity losses for survivors and caregivers (absenteeism, presenteeism, income loss) |                                                                                                                                                    |
| <b>Study type</b>                             | Observational studies (i.e., cohort, case control, cross-sectional, case series); Database studies; Modelling studies; Economic evaluations; SLRs or TLRs (for reference chasing only)                                                                                                                                                                                                                                                                                                       |  |                                                                                                                                                                                       | RCTs; Non-randomised and single-armed designs; In vitro/ ex vivo/ animal/ pharmacokinetic studies; Narrative reviews                               |
| <b>Sub-analysis and subgroups of interest</b> | Based on the following countries/Country specific subgroups in adults/adolescents/children:<br>US*<br>EU5 (France, Germany, Italy, Spain and the United Kingdom)<br>Japan<br>Other high-income countries<br>Latin America^<br>COVID-19<br>Exposure as per Dahlgren model<br>Outcomes (based on IMD risk, prevention and control)<br>Age-based subgroups (e.g., infants vs. children vs. adolescents vs. adults vs. older adults, etc.)<br>Different serogroups<br>Study type-based subgroups |  |                                                                                                                                                                                       | African region/Sub-Sahara<br>Africa<br>Middle and low-income countries**                                                                           |
| <b>Publication type</b>                       | Full-text publications<br>Conference abstracts and posters (2020–present)                                                                                                                                                                                                                                                                                                                                                                                                                    |  |                                                                                                                                                                                       | Conference abstracts published prior to 2020; Editorials; Erratum; Trial protocols; Guidelines; Narrative reviews; Systematic reviews <sup>‡</sup> |
| <b>Limits</b>                                 |                                                                                                                                                                                                                                                                                                                                                                                                                                                                                              |  |                                                                                                                                                                                       |                                                                                                                                                    |
| <b>Time Period</b>                            | 2012–present                                                                                                                                                                                                                                                                                                                                                                                                                                                                                 |  |                                                                                                                                                                                       | Studies published prior to 2012                                                                                                                    |
| <b>Language</b>                               | English, French, Spanish, Italian, Portuguese                                                                                                                                                                                                                                                                                                                                                                                                                                                |  |                                                                                                                                                                                       | Studies in other languages will be tagged but not extracted                                                                                        |
| <b>Countries</b>                              | High-income countries including US, EU5 (France, Germany, Italy, Spain and the United Kingdom), Latin America <sup>‡</sup>                                                                                                                                                                                                                                                                                                                                                                   |  |                                                                                                                                                                                       | African region/Sub-Sahara<br>Africa                                                                                                                |

|  |  |                                   |
|--|--|-----------------------------------|
|  |  | Middle- and low-income countries* |
|--|--|-----------------------------------|



## 11 Study characteristics summary (see Table S3)

12 Study populations included IMD patients,<sup>19,20,28,30,32</sup> MSM,<sup>24,25,29</sup> healthy volunteers,<sup>23,55</sup>  
13 students,<sup>31,56</sup> the general population (vaccinated or not),<sup>34</sup> insured populations,<sup>21</sup>  
14 parents/carers of IMD patients,<sup>36</sup> susceptible populations,<sup>22</sup> and healthcare providers  
15 (HCPs).<sup>52</sup>

16 Most studies (n=16) included nationwide data, while other studies were conducted in  
17 particular states e.g., California, Maryland, Minnesota, New York, Ohio, Oregon and Rhode  
18 Island (**Figure S2**).

### 19 **Figure S2. US Geographical Locations Across the Included Studies**

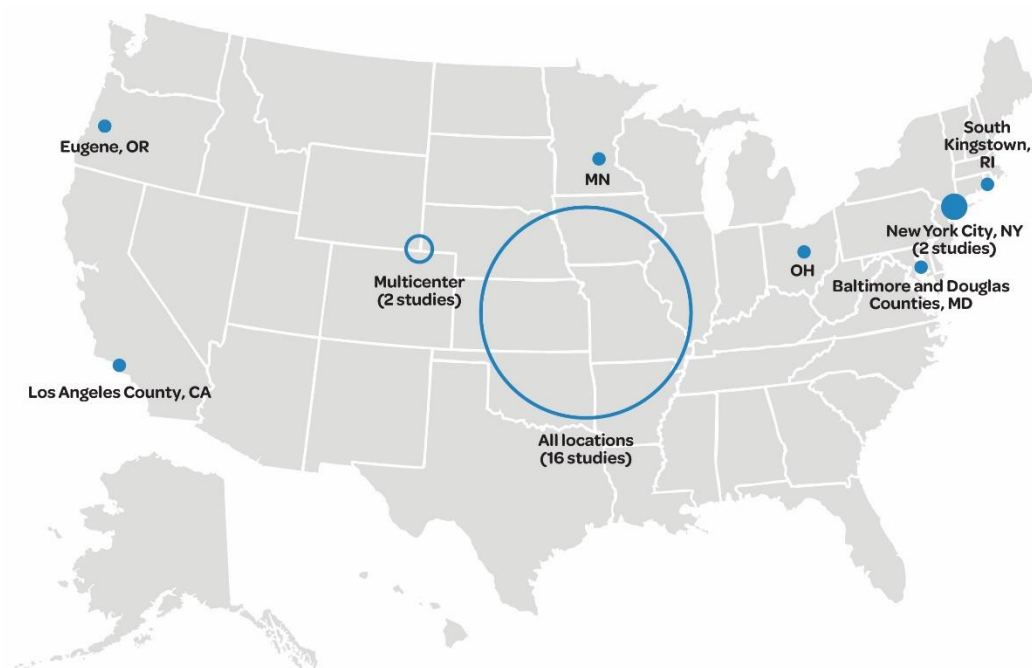

20

21 CA: California; MD: Maryland; MN: Minnesota; NY: New York; OH: Ohio; OR: Oregon; RI: Rhode Island

22 Most study designs were retrospective cohort<sup>19,20,22,29,31,32,34</sup> or cross-sectional studies,

23 <sup>21,24,28,36,56</sup> while others included prospective cohorts<sup>23,55</sup> or case controls.<sup>25,30</sup> Sample sizes

24 ranged from 34 IMD patients<sup>19</sup> to 32,9 million commercially-insured adults patients.<sup>21</sup> Data

25 collection periods ranged from 13 years (i.e., from 2005 to 2018)<sup>37,57</sup> to <1 year.<sup>27,34,36,39,52,56</sup>

26 Study data sources included the National Notifiable Diseases Surveillance System  
27 (NNDSS),<sup>19,29</sup> Enhanced Meningococcal Disease Surveillance,<sup>28,31</sup> Active Bacterial Core  
28 surveillance and state health departments,<sup>32</sup> the National Immunization Survey-Teen (NIS-  
29 Teen) data,<sup>10,26,38,39</sup> and the NYC Department of Health and Mental Hygiene.<sup>20,25</sup> Medicaid  
30 and commercial claims databases were included.<sup>21,22,30,33,37,56,57</sup> Data were also collected from  
31 universities,<sup>27,30,52,56</sup> patient records,<sup>34</sup> surveys,<sup>36</sup> high schools,<sup>23</sup> and vaccination campaigns.<sup>55</sup>

32

Table S3. Study characteristics

| Study Name<br>Author, Year | Country                                                | Brief Patient Description                                                           | Study Design               | Sample Size                               | Data Source                                                    | Data<br>Collection<br>Years | Outcomes<br>Reported  |
|----------------------------|--------------------------------------------------------|-------------------------------------------------------------------------------------|----------------------------|-------------------------------------------|----------------------------------------------------------------|-----------------------------|-----------------------|
| <b>Basta, 2019</b>         | US (Minnesota)                                         | Parents of teens attending high school in 2017-2018                                 | Cross-sectional study      | 445                                       | University of Minnesota's Driven to Discover research facility | 2017                        | IMD Prevention        |
| <b>Blain, 2021</b>         | US (all locations)                                     | Meningococcal disease patients who were previously vaccinated with MenACWY vaccine  | Retrospective cohort study | 34                                        | NNDSS                                                          | 2014-2018                   | IMD Risk, IMD Control |
| <b>Bloch, 2018</b>         | US (NYC)                                               | Persons aged $\geq 15$ years diagnosed with IMD                                     | Retrospective cohort study | 151                                       | DOHMH                                                          | 2008-2016                   | IMD Risk, IMD Control |
| <b>Breakwell, 2018</b>     | US (South Kingstown, Rhode Island)                     | Undergraduate students tested for meningococcal carriage                            | Cross-sectional study      | 1,837                                     | Survey at a Rhode Island university                            | 2015                        | IMD Risk              |
| <b>Cheng, 2020</b>         | US (all locations)                                     | Adolescents aged 17 years                                                           | Cross-sectional study      | Unweighted: 22,928<br>Weighted: 3,948,025 | NIS-Teen                                                       | 2011-2016                   | IMD Prevention        |
| <b>Folaranmi, 2017</b>     | US (all locations)                                     | MSM and non-MSM having meningococcal disease                                        | Retrospective cohort study | 527                                       | NNDSS                                                          | 2012-2015                   | IMD Risk              |
| <b>Ghaswalla, 2022</b>     | US (Multicentre, from a variety of geographic regions) | People with a new diagnosis of HIV who were eligible for MenACWY vaccine            | Retrospective cohort study | 1,208                                     | Optum Research Database                                        | 2016-2018                   | IMD Prevention        |
| <b>Ghaswalla, 2021</b>     | US (all locations)                                     | Patients with newly diagnosed asplenia and eligible for MenACWY or MenB vaccination | Retrospective cohort study | MenACWY: 2,273<br>MenB: 741               | Optum Research Database                                        | 2005-2018                   | IMD Prevention        |

|                           |                                                                  |                                                                                                       |                            |                                                                                                                                                                          |                                                                    |           |                |
|---------------------------|------------------------------------------------------------------|-------------------------------------------------------------------------------------------------------|----------------------------|--------------------------------------------------------------------------------------------------------------------------------------------------------------------------|--------------------------------------------------------------------|-----------|----------------|
| <b>Hansen, 2021</b>       | US (all locations)                                               | Adolescents aged 17 years                                                                             | Cross-sectional study      | 7,288                                                                                                                                                                    | NIS-Teen                                                           | 2017-2018 | IMD Prevention |
| <b>Harrison, 2015</b>     | US (Baltimore County, Maryland and Douglas County)               | High school students vaccinated with MCV4                                                             | Prospective cohort study   | 3,311                                                                                                                                                                    | High school vaccination record                                     | 2006-2007 | IMD Risk       |
| <b>Holloway, 2018</b>     | US (Los Angeles County)                                          | MSM who might or might not have received the MenACWY vaccine                                          | Cross-sectional study      | 368                                                                                                                                                                      | NR                                                                 | 2016-2017 | IMD Prevention |
| <b>Huang, 2020</b>        | US (Multicentre, Lightspeed/All Global panel of >55,600 US HCPs) | Patients who received or did not receive MenB vaccine within the previous 6 months                    | Retrospective cohort study | 1,521                                                                                                                                                                    | Patient chart review conducted by HCPs                             | 2017      | IMD Prevention |
| <b>Kempe, 2018</b>        | US (all locations)                                               | Paediatricians and family physicians                                                                  | Cross-sectional study      | 660                                                                                                                                                                      | University of Colorado Denver                                      | 2016      | IMD Prevention |
| <b>Krishnarajah, 2014</b> | US (all locations)                                               | Adult Medicaid and commercially insured populations                                                   | Cross-sectional study      | Medicaid: 1,658,054<br>Commercial: 2,800,0862                                                                                                                            | Truven MarketScan® Medicaid and commercial databases               | 2006-2010 | IMD Risk       |
| <b>Kurosky, 2019</b>      | US (all locations)                                               | Younger adolescents aged 10.5 through 13 years and older adolescents aged 15.5 years through 18 years | Retrospective cohort study | Commercial Claims and Encounters<br>Younger adolescents: 376,825<br>Older adolescents: 419,814<br>Medicaid<br>Younger adolescents: 310,383<br>Older adolescents: 206,301 | Commercial Claims and Encounters and Medicaid MarketScan Databases | 2011-2016 | IMD Prevention |
| <b>La, 2021</b>           | US (all locations)                                               | Adolescents aged 17 years                                                                             | Cross-sectional study      | 7,288                                                                                                                                                                    | NIS-Teen                                                           | 2017-2018 | IMD prevention |

|                       |                     |                                                                                                              |                            |                                         |                                                                                                         |           |                |
|-----------------------|---------------------|--------------------------------------------------------------------------------------------------------------|----------------------------|-----------------------------------------|---------------------------------------------------------------------------------------------------------|-----------|----------------|
| <b>Mandal, 2013</b>   | US (Ohio)           | Confirmed meningococcal disease (cases) and matched controls                                                 | Case control study         | 42                                      | University                                                                                              | 2008-2010 | IMD Risk       |
| <b>Marshall, 2022</b> | US (all locations)  | Patients with complement component deficiencies and eligible for MenACWY or MenB vaccination                 | Retrospective cohort study | MenACWY: 1,470<br>MenB: 396             | Optum Research Database                                                                                 | 2005-2018 | IMD Prevention |
| <b>Mbaeyi, 2019</b>   | US (all locations)  | All confirmed and probable meningococcal cases in students aged 18 to 24 years                               | Retrospective cohort study | 163                                     | NNDSS and EMDS                                                                                          | 2014-2016 | IMD Risk       |
| <b>Mbaeyi, 2019</b>   | US (all locations)  | Cases of meningococcal disease (sporadic and outbreak-associated)                                            | Retrospective cohort study | 3,686                                   | NNDSS, Active Bacterial Core surveillance and state health departments                                  | 2009-2013 | IMD Risk       |
| <b>McNamara, 2017</b> | US (Eugene, Oregon) | Healthy participants (to assess carriage rate)                                                               | Prospective cohort study   | 4,225                                   | Vaccination campaign in response to a university serogroup B meningococcal disease outbreak             | 2015-2016 | IMD Risk       |
| <b>Packnett, 2022</b> | US (all locations)  | Adolescents and young adults with private (Commercial) and Medicaid insurance who initiated MenB vaccination | Retrospective cohort study | Commercial: 156,080<br>Medicaid: 57,082 | IBM MarketScan Commercial Claims and Encounters databases; IBM MarketScan Multi-State Medicaid Database | 2014-2020 | IMD Prevention |
| <b>Pingali, 2021</b>  | US (all locations)  | Adolescents aged 13-17 years                                                                                 | Cross-sectional study      | NR                                      | NIS-Teen                                                                                                | 2020      | IMD Prevention |
| <b>Ridpath, 2015</b>  | US (NYC)            | MSM with outbreak-related serogroup C meningococcal disease                                                  | Case control study         | 68                                      | NYC DOHMH                                                                                               | 2012-2013 | IMD Risk       |
| <b>Rudmann, 2022</b>  | US (all locations)  | PEH and non-PEH with IMD                                                                                     | Cross-sectional study      | 1,409                                   | NNDSS and EMDS                                                                                          | 2016-2019 | IMD Risk       |

|                         |                    |                                                                                                                       |                       |     |                                                                          |      |                |
|-------------------------|--------------------|-----------------------------------------------------------------------------------------------------------------------|-----------------------|-----|--------------------------------------------------------------------------|------|----------------|
| <b>Srivastava, 2020</b> | US (all locations) | Adult parents or guardians (aged within the range of 35 to $\geq 65$ years) of $\geq 1$ dependent aged 16 to 19 years | Cross-sectional study | 619 | Survey (participants were identified through the Ipsos Knowledge Panel®) | 2016 | IMD Prevention |
|-------------------------|--------------------|-----------------------------------------------------------------------------------------------------------------------|-----------------------|-----|--------------------------------------------------------------------------|------|----------------|

34 **DOHMH:** Department of Health and Mental Hygiene; **EMDS:** Enhanced Meningococcal Disease Surveillance; **HCP:** healthcare provider; **IMD:** invasive meningococcal  
35 disease; **MCV4:** quadrivalent meningococcal conjugate vaccine; **MenACWY:** quadrivalent meningococcal conjugate vaccine (serogroups A, C, W, Y); **MenB:**  
36 meningococcal serogroup B; **MSM:** men who have sex with men; **NIS-Teen:** National Immunization Survey-Teen; **NNDSS:** National Notifiable Diseases Surveillance  
37 System; **NR:** not reported; **NYC:** New York City; **PEH:** people experiencing homelessness; **US:** United States

38 **Table S4. Quality Assessment Scores Using Newcastle Ottawa**  
 39 **Scales**

| <b>Author, Year</b>                 | <b>Total Score</b> |
|-------------------------------------|--------------------|
| <b>NOS - Case Control (n=2)</b>     |                    |
| Mandal, 2013                        | 5                  |
| Ridpath, 2015                       | 6                  |
| <b>NOS - Cohort (n=13)</b>          |                    |
| Blain, 2021                         | 7                  |
| Bloch, 2018                         | 7                  |
| Folaranmi, 2017                     | 6                  |
| Ghaswalla, 2021                     | 9                  |
| Ghaswalla, 2022                     | 8                  |
| Harrison, 2015                      | 7                  |
| Huang, 2020                         | 5                  |
| Kurosky, 2019                       | 6                  |
| Marshall, 2022                      | 7                  |
| Mbaeyi, 2019 (refID 861)            | 7                  |
| Mbaeyi, 2019 (refID 957)            | 7                  |
| McNamara, 2017                      | 5                  |
| Packnett, 2022                      | 9                  |
| <b>NOS - Cross-sectional (n=11)</b> |                    |
| Basta, 2019                         | 6                  |
| Breakwell, 2018                     | 6                  |
| Cheng, 2020                         | 8                  |
| Hansen, 2021                        | 8                  |
| Holloway, 2018                      | 9                  |
| Kempe, 2018                         | 5                  |
| Krishnarajah, 2014                  | 9                  |
| La, 2021                            | 8                  |
| Pingali, 2021                       | 7                  |
| Rudmann, 2022                       | 7                  |
| Srivastava, 2020                    | 7                  |

40 Abbreviations: NOS = Newcastle Ottawa Scale  
 41

## File S1. Complementary results

Results showing no association between characteristics and IMD risk and prevention, or an association but not likely to have a high impact on equity.

### IMD risk and prevention and individual characteristics/behaviors

#### IMD prevention by race/ethnicity:

In an MSM population with HIV (12.8%), no association between ethnicity/race and MenACWY vaccine uptake was reported (aOR: non-Hispanic White [reference]; non-Hispanic Black/African American: 1.3 [95% CI 0.51–3.36]; Hispanic: 1.53 [95% CI 0.69–3.38]; Others: 0.51 [95% CI 0.18–1.45]).<sup>24</sup>

MenB vaccination coverage in adolescents aged 17 years tended to be higher (non-significant) in Hispanic versus non-Hispanic White adolescents (OR 1.31 [0.92-1.86]) and lower (non-significant) in Black versus non-Hispanic White adolescents (OR 0.74 [0.48-1.14]) (NIS-Teen 2017–2018 data), but multivariate models showed no associated with race/ethnicity.<sup>10,38</sup>

#### Age

##### Inequalities in IMD risk by age:

###### *Incidence*

Incidence of IMD is highest in infants and young children,<sup>58</sup> however, no studies assessed inequalities in these age groups. Among adults, the incidence of IMD increased with age across both Medicaid and commercially-insured populations, with the lowest incidence (per



100,000 persons) in 19-34-year-olds (male 11.1 and female 7.8 with Medicaid; male 1.2 and female 1.5 with Commercial) and the highest in 55-64-year-olds (male 39.4 and female 42.6 with Medicaid; male 3.9 and female 4 with Commercial).<sup>21</sup>

There was a positive correlation between IMD incidence and age, up to the age of 64 years, for both sporadic and outbreak MenB cases, after which incidence decreased in individuals  $\geq 65$  years. Serogroup B was responsible for most organization-based outbreak cases aged 11-24 years, and serogroup C for most community outbreak cases aged median 1-42 years.<sup>32</sup>

Among adult MSM in New York City (NYC), Los Angeles, and Chicago, as well as sporadic cases across the US, the proportion with IMD peaked in 26-35-year-olds (43.2%) and decreased thereafter in 36-55-year-old age groups (16.2-18.9%), with the lowest proportion in 56-64-year-olds (1.4%). Most cases in MSM were due to serogroup C and occurred in age groups not currently recommended to receive MenACWY. Among non-MSM, the highest proportion with IMD was in 18-25-year-olds (31.4%) decreasing thereafter, with significant differences ( $p < 0.001$ ) in proportions with IMD by age groups between MSM and non-MSM.<sup>29</sup>

### *Mortality*

No difference in IMD mortality by age was found in a study in NYC (from 2008-2016): compared to the age group 25-44 years (reference group), the adjusted relative risk (aRR) of IMD mortality was aRR 0.55 (95% CI 0.24–1.22) for ages  $\geq 65$  years; aRR 0.79 (95% CI 0.40–1.56) for ages 45–64 years; aRR 0.61 (95% CI 0.27–1.34) for ages 15–24 years.<sup>20</sup>

### *Carriage*

Older high school students were at higher risk of meningococcal carriage than younger age groups (odds ratio OR 1.3, 95% CI 1.2–1.5) across eight high schools in Maryland and

Georgia.<sup>23</sup> IMD carriage in university students in Oregon (2015-2016) was significantly higher in 20-year-olds versus other age groups (prevalence ratio 1.6, 95% confidence interval [95% CI] 1.1–2.3).<sup>55</sup> However, in university students in Rhode Island (2015), no significant association between IMD carriage and age group was reported (prevalence ratio 1.00, 95% CI 0.98–1.03).<sup>56</sup>

### Inequalities in IMD prevention by age:

#### *MenACWY*

Older adolescents (aged 15.5-18 years) were less likely to receive MenACWY compared with younger adolescents (aged 10.5-13 years), based on data from the Commercial Claims and Encounters (CCAЕ) and Medicaid MarketScan Databases (adjusted odds ratio aOR 0.68 [0.67-0.69]).<sup>33</sup> By contrast, the 2017-2018 NIS-Teen data reported MenACWY vaccination coverage was higher in adolescents aged 15 and 17 years versus 13, 14 or 16 years.<sup>39</sup>

#### *MenB*

MenB (MenB-4C and MenB-FHbp) series completion rates in 16-23-year-olds were significantly higher with MenB-4C versus MenB-FHbp (61.1% vs 49.8% and 47.8% vs 33.9% in commercial and Medicaid populations, respectively), and both MenB-4C and younger age were independently associated with a higher likelihood of series completion in commercial and Medicaid populations (e.g., aRR 0.57 [0.52–0.62] and aRR 0.43 [0.32–0.57] for 23 versus 16-year-olds in commercially-insured and Medicaid populations, respectively).<sup>35</sup>

Assessment of MenB vaccination practices in primary care showed a higher likelihood of pediatricians and family physicians strongly recommending MenB vaccination for healthy

16-18-year-olds and adolescents/young adults entering college than for healthy 11-12-year-olds.<sup>52</sup>

#### *MenACWY/MenB in chronic conditions*

MenACWY coverage ( $\geq 1$  dose) in newly diagnosed asplenia patients was significantly lower in patients aged  $\geq 19$  years versus those aged 2-10 years (HR 0.21 [95% CI 0.14–0.31]).<sup>37</sup> Similarly, MenB coverage ( $\geq 1$  dose) in newly diagnosed asplenia patients aged  $\geq 19$  years was significantly lower than in 10-18-year-olds (HR 0.34 [0.15–0.79]).<sup>37</sup> In patients with complement component deficiencies, MenACWY vaccination was much more likely in children and adolescents than adults (11.3% for 2–10 years of age; 29.7% for 11–18 years; 1.6% for 19–55 years; and 1.2% for  $\geq 56$  years); and no adults had received MenB vaccination versus 13.0% of those aged 10–18 years.<sup>57</sup> In patients with a new diagnosis of HIV eligible for MenACWY, patients aged  $\geq 56$  years were significantly less likely to receive MenACWY than patients aged 2-55 years (HR 0.42 [95% CI 0.18–0.97]).<sup>22</sup> Among MSM in Los Angeles County, those aged  $\geq 30$  years had a significantly higher MenACWY vaccine uptake compared with those aged 18-29 years (aOR 2.57 [95% CI 1.31–5.03])

#### *IMD risk by sex/sexual orientation:*

No difference in mortality was found for MSM versus non-MSM (32.4% vs. 23.5%) in NYC (2012-2015).<sup>29</sup>

## *Sex/ Sexual Orientation*

### **Inequalities in IMD risk by sex/ sexual orientation:**

#### *Incidence*

IMD outbreak cases across 16 US states between 2009 and 2013, reported 65% of cases were in men.<sup>32</sup> In NYC, mean annual IMD incidence (per 100,000) between 2008 and 2016 was higher in men (0.3) than in women (0.2).<sup>20</sup>

The mean annual US IMD incidence (per 100,000 persons from 2012-2015) was higher in 18-64-year-old MSM compared with non-MSM (annualized incidence rate 0.56 vs. 0.14, relative risk [RR] 4.0 [95% CI 3.1–5.1]).<sup>29</sup> Incidence among sporadic cases were higher in MSM versus non-MSM (annualized incidence rate 0.26 vs. 0.14, RR 1.9 [95% CI 1.3–2.8]).<sup>29</sup> Similarly, the median number of community outbreak cases among MSM (13) was higher than in non-MSM (3) over the period 2009-2013.<sup>32</sup>

#### *Mortality*

In a population aged  $\geq 15$  years in NYC (2008-2016), IMD case-fatality rate (CFR) was higher in women than men (37% vs. 19%, risk of death 2.1 [95% CI 1.2–3.8]).<sup>20</sup> There was an association between sex and IMD after controlling for age, race/ethnicity, neighborhood-level poverty, serogroup, altered mental status, petechiae, Hepatitis C and shock.<sup>20</sup> Women with IMD were 13.7 times as likely to die as men (95% CI 3.2–58.1), compared with women without IMD, who were 1.9 times as likely to die as men (95% CI 1.1–3.5).<sup>20</sup>

#### *Carriage*

In university students in Rhode Island (2015), male students were at a higher risk of meningococcal carriage than female students (OR 1.66 [95% CI 1.29–2.14]).<sup>29</sup> Similarly,

among outbreak cases in university students in Oregon (2015-2016), males were associated with increased carriage compared with females (prevalence ratio 1.2 [95% CI 1.0–1.5]).<sup>55</sup>

### Inequalities in IMD prevention by sex/sexual orientation:

#### *MenACWY*

Females aged 17 years were less likely to complete the primary and booster dose of the MenACWY vaccine (OR 0.63 [95% CI 0.56–0.71]) and comply with ACIP meningococcal vaccination recommendations (0.67 [0.60–0.76]) than males, based on NIS-Teen 2011-2016 data.<sup>26</sup> Female adolescents also had a higher likelihood of  $\geq 1$  missed opportunities for receipt of  $\geq 1$  MenACWY vaccine versus males (aOR 1.08 [95%CI 1.07–1.09]).<sup>33</sup>

In newly diagnosed HIV patients (2016 to 2018), males were associated with increased uptake of the MenACWY vaccine compared with females (HR 2.72 [95% CI 1.18–6.26]).<sup>22</sup>

In newly diagnosed asplenia patients, males also had a higher likelihood of receiving  $\geq 1$  dose of MenACWY vaccine than females (HR 1.24 [1.05–1.46]).<sup>37</sup>

There was no association between MenACWY vaccination coverage and the number of sexual partners in the previous six months, for adult MSM.<sup>24</sup>

#### *MenB*

In 16-23-year-olds, MenB series completion was significantly higher for females versus males in MenB-4C vs. MenB-FHbp, for both commercial and Medicaid populations (aRR 1.02 [1.02–1.03] for commercial and aRR 1.05 [1.03–1.06] for Medicaid).<sup>35</sup>

Among adult parents or guardians of  $\geq 1$  dependent aged 16 to 19 years, male parents/guardians were mostly not aware of MenB vaccines, compared with female parents/guardians (OR 0.43, 95% CI 0.26–0.7).<sup>36</sup>

While HCPs were more likely to prescribe MenB vaccines to males, males and females were equally likely to receive MenB vaccination (OR 0.84).<sup>34</sup> Results from NIS-Teen and a parental survey also showed no association between receipt (OR 1.00 [0.76–1.32])<sup>10,38</sup> or coverage (OR 0.89 [0.68–1.15])<sup>38</sup> of  $\geq 1$  dose of MenB vaccine for female versus male adolescents.

MenB vaccination coverage in newly diagnosed asplenia patients (Optum Research Database 2016–2018) observed no association between sex and MenB uptake.<sup>37</sup>

## *Students*

### **Inequalities in IMD risk in students:**

#### *Incidence*

IMD outbreak cases in a university in Ohio were associated with attending bars (85.7% cases vs. 37.1% controls, matched OR 8.06 [95% CI 1.12– $\infty$ ]).<sup>30</sup>

In university students, IMD outbreak cases (2008-2010) were associated with having more than one kissing partner, in univariate analysis (66.7% cases vs. 22.9% controls, matched OR 13.66 [95% CI 1.23–708.7]).<sup>30</sup>

In university students who were freshman (78%) living in residential halls, or non-students who socialized or interacted with university students, Greek society/fraternity/sorority membership was associated with IMD incidence (42.9% cases vs. 2.9% controls, matched OR 15.0 [95% CI 1.2–787.5]).<sup>30</sup>

No association was found among MSM outbreak cases in NYC between 2012 and 2013 (70% cases vs. 52.5% controls, matched OR adjusted for HIV infection 1.8 [95% CI 0.4–10.6]).<sup>25</sup>

A non-significant association between IMD outbreak and “sex with >1 man during month before illness” was reported in MSM in NYC (2012-2013) (61.5% cases vs. 35.3% controls, matched OR adjusted for HIV infection, 2.8 [95% CI 0.7–13.7]).<sup>25</sup>

In university students who were freshman (78%) living in residential halls, or non-students who socialized or interacted with university students, no associations were found for sports team members 42.9% cases vs. 22.9% controls, matched OR 15.0 [95% CI 0.31–13.54]) or other club members (14.3% vs. 37.1%, matched OR 0.3 [95% CI 0.006–2.8]).<sup>30</sup> No association was found with having more than one sexual partner, in univariate analysis (42.9% cases vs. 25.7% controls, matched OR 1.97 [95% CI 0.27–12.56]).<sup>30</sup>

### Carriage

University students in Rhode Island (2015)<sup>56</sup> and Oregon (2015-2016)<sup>55</sup> with more frequent social events (e.g., bars/parties) were at higher risk of IMD carriage (**Figure S3**).

**Figure S3. IMD carriage (prevalence ratio) by frequency of socializing**

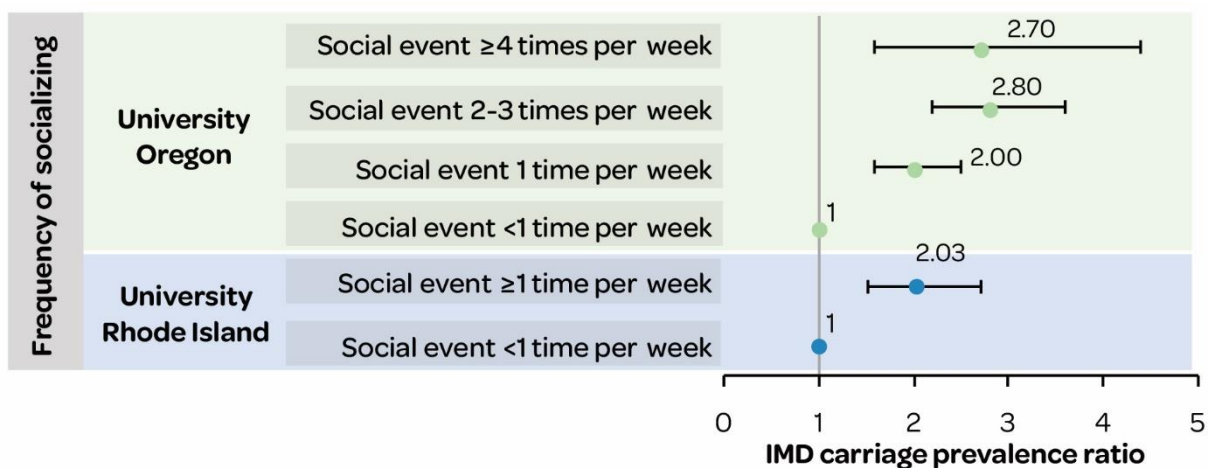

### Illegal Drug Use

Inequalities in IMD risk by drug use:

### Incidence

Use of methamphetamine or cocaine during the month before IMD onset was associated with IMD outbreak cases in MSM, after controlling for HIV (methamphetamine cases vs. controls: 41.2% vs. 0%, matched OR 16.6 [95% CI 3.1–∞]; cocaine cases vs. controls: 28.6% vs. 0%, matched OR 11.2 [95% CI 1.8–∞]).<sup>30</sup>

IMD outbreak cases were not associated with marijuana use in university students (2008-2010) (42.9% cases vs. 28.6% controls, matched OR 1.85 [95% CI 0.23–12.81]); or in MSM in NYC (2012-2013) (20% cases vs. 25.5% controls, matched OR 0.5 [95% CI 0.1–2.4]).<sup>30</sup>

### IMD prevention by drug use:

No association was observed between illicit drug use and vaccine uptake among MSM during an IMD outbreak (aOR 1.21 [95% CI 0.65–2.24]).<sup>24</sup>

### *Chronic conditions*

#### Inequalities in IMD risk for chronic conditions:

##### *Incidence*

HIV infection was associated with increased IMD incidence in MSM in NYC (2012-2013) (58.8% cases vs. 25.5% controls, matched OR 6.4 [95% CI 1.5–45.1]);<sup>25</sup> and in MSM aged 18 to 64 years across the US (2012-2015) i.e., annualized incidence rate per 100,000 in non-HIV infected MSM (0.23) vs. HIV-infected (2.28) (RR 10.1 [95% CI 6.1–16.6]).<sup>29</sup>

No difference was observed in IMD mortality in immunosuppressed (13%) versus non-immunosuppressed (15%) populations, among individuals who received one or more doses of MenACWY vaccine in the US between 2014 and 2018.<sup>19</sup>



## Inequalities in IMD prevention for chronic conditions:

### *MenACWY*

A history of asthma was associated with a higher odds of MenACWY primary and booster dose compliance in adolescents aged 17 years (NIS-Teen data) (OR 1.17 [1.00–1.37]).<sup>26</sup>

### *MenB*

In primary care, MenB vaccination was strongly recommended by more HCPs for  $\geq 10$ -year-olds with an increased risk for meningococcal disease (81% of pediatricians and 56% of family physicians) versus for healthy 11- to 12-year-olds (11% of pediatricians and 33% of family physicians), healthy 16- to 18-year-olds (58% of pediatricians and 50% of family physicians, non-significant) or healthy adolescents/young adults entering college (66% of pediatricians and 56% of family physicians, non-significant).<sup>52</sup>

Having other high-risk health conditions was not associated with MenACWY primary and booster dose completion or compliance (MenACWY compliance OR 1.23 [0.98–1.54]).<sup>26</sup>

A history of asthma had no association with MenACWY booster vaccination.<sup>26</sup>

No association was found between HIV status and MenACWY vaccine uptake in an adult MSM population (aOR 1.12, 95% CI 0.43–2.91).<sup>24</sup>

Pre-index HIV versus no HIV was not significantly associated with MenB vaccination series completion rates in 16-23-year-olds, from commercial insurance and Medicaid populations (OR 1.16 [0.78–0.1.73]).<sup>35</sup>

## *Smoking*

### **Inequalities in IMD risk by smoking:**

#### *Carriage*

IMD carriage was associated with current smokers versus non-smokers (12% vs. 5.0%, OR 1.6 [95% CI 1.1–2.4]) in high school students in Georgia and Maryland.<sup>23</sup> Similarly in university students in Oregon in 2015, an association was found between smoking status and IMD carriage (any serogroup; MenB): (prevalence ratio 1.4 [95% CI 1.2–1.7]; 2.0, [95% CI 1.1–3.6]);<sup>55</sup> and in undergraduate students in a Rhode Island university in 2015 (adjusted prevalence ratio 1.53, 95% CI 1.21–1.94).<sup>56</sup>

A difference in IMD carriage was reported in high school students who lived in households with other smokers compared with those who did not (7.4% vs. 4.6%).<sup>23</sup>

No association with IMD carriage was found in university students with versus without second-hand smoke exposure in the past 30 days (adjusted prevalence ratio 1.17 [95% CI 0.91–1.51]).<sup>56</sup>

#### *Access to care*

### **IMD prevention by access to care:**

A non-significant trend of lower MenB vaccination rates ( $\geq 1$  dose) was observed in individuals who had not received their last check-up at age 16 or 17 years (not aged 16/17 at last-checkup 6.9% [4.0–11.6] vs. 16.8% [15.0–18.7]), OR yes vs. no 1.78 [0.97–3.04],  $p=0.0645$ ) (NIS-Teen data 2017–2018).<sup>10,38</sup>

## IMD risk and prevention and socioeconomic factors

### IMD prevention by insurance type/status

No association was found between MenACWY primary and booster dose completion and health insurance.<sup>26</sup>

### IMD prevention by social deprivation

No association was found for MenACWY primary and booster dose compliance and income.<sup>26</sup>

Among MSM, during an IMD outbreak in Southern California, there was no association between household income and MenACWY vaccine uptake (aOR 0.77 [95% CI 0.33–1.8]); either by residing region (aOR 1.29, 95% CI 0.67–2.49) nor residing in a ZIP code where  $\geq 20\%$  of all families were living below the federal poverty level (aOR 0.97, 95% CI 0.48–1.93).<sup>24</sup>

### IMD risk by education level

No difference in IMD mortality was found (12.4% vs. 13%,  $p=0.83$ ). Incidence of serogroups C, W and Y were low, but more prominent in those with serogroup B (0.17 vs. 0.05, RR 3.54 [2.21-5.41]).<sup>31</sup> No association was found between incidence of outbreak-related IMD cases and grade point average in university students.<sup>30</sup>

No association for IMD carriage and class years (freshman, sophomore, junior and senior) was found in universities in Rhode Island and Oregon (2015-2016).<sup>55,56</sup>

In an MSM population, education status was not associated with MenACWY vaccine uptake (aOR 0.91 [0.48–1.74]).<sup>24</sup>

## IMD risk by homelessness

There was no difference in the number of deaths across the PEH (4.4%) and non-PEH (12.5%) groups.<sup>28</sup>

## IMD risk and prevention and environmental factors

### IMD risk by housing/household size

Among US freshmen university students (78%) and lived in residential halls, or non-students who socialized or interacted with university students: no difference was found in IMD incidence by living in residence halls (100% cases vs. 97.1% controls, OR 0.20 [95% CI 0.005–∞]).<sup>30</sup>

There was no difference in IMD carriage among university students in Rhode Island (2015) who lived in residence halls versus those who did not live in residence halls (prevalence ratio 0.85 [95% CI 0.66–1.10]);<sup>56</sup> or among university students in Oregon (2015-2016) who lived on-campus versus off-campus (prevalence ratio 1.3 [95% CI 0.7–2.2]);<sup>55</sup> or due to number of roommates (roommates 0-3+, 1.0 [0.7–1.4]; 2 roommates, 1.0 [0.7–1.5]; 3+ roommates, 1.2 [0.8–1.7]).<sup>55</sup>

Table S5. Inequalities in IMD incidence by individual characteristics/behaviors

| Author Year                     | Patients                                                                                      | Exposure                | IMD incidence                                                                                                                                                                                                                                                                                                                                                          | Interpretation of impact on inequality                                                                                                                                                                                                                                                                                                                                             |
|---------------------------------|-----------------------------------------------------------------------------------------------|-------------------------|------------------------------------------------------------------------------------------------------------------------------------------------------------------------------------------------------------------------------------------------------------------------------------------------------------------------------------------------------------------------|------------------------------------------------------------------------------------------------------------------------------------------------------------------------------------------------------------------------------------------------------------------------------------------------------------------------------------------------------------------------------------|
| Krishnarajah 2014 <sup>21</sup> | Medicaid: 1,658,054 adults<br>Commercial: 2,800,0862 adults<br>Years 2006-2010<br>Ages 19-64y | Age (stratified by sex) | Mean incidence proportions (per 100,000)<br>Medicaid<br>19-34y male: 11.1 vs. female: 7.8<br>35-44y male: 18.7 vs. female: 13.4<br>45-54y male: 27.2 vs. female: 28.7<br>55-64y, male: 39.4 vs. female: 42.6<br>Commercial<br>19-34y male: 1.2 vs. female: 1.5<br>35-44y male: 1.4 vs. female: 1.8<br>45-54y male: 2 vs. female: 2.7<br>55-64y male: 3.9 vs. female: 4 | The incidence of IMD increased with age in both male and female, and in Medicaid and Commercially insured populations.<br>There is inequality due to age and insurance type on the incidence proportion of IMD.                                                                                                                                                                    |
| Mbaeyi 2019 <sup>32</sup>       | N=3,686 IMD cases (sporadic and outbreaks) aged <1y-≥65y                                      | Age                     | Incidence proportion n (%)<br>Sporadic<br><1 year: 415 (11.8)<br>1-10 years: 447 (12.8)<br>11-24 years: 706 (20.1)<br>25-64 years: 1,250 (35.7)<br>≥65 years: 688 (19.6)<br>Outbreak-associated<br><1 year: 8 (4.4)<br>1-10 years: 36 (20.0)<br>11-24 years: 63 (35.0)<br>25-64 years: 63 (35.0)<br>≥65 years: 10 (5.6)                                                | Age was positively correlated with incidence till the age group of ≥65 years, for both, sporadic and outbreak-associated cases. Outbreak-associated cases reported to have more cases from the age groups of 11-24 and 25-64, while sporadic cases observed to have more of 25-64 age group individuals. Numerically, there was inequality in IMD incidence as per age categories. |
| Folaranmi 2017 <sup>29</sup>    | N=527 MSM and non-MSM with IMD                                                                | Age                     | Proportion of individuals n (%):<br>MSM<br>18-25y: 15 (20.3)<br>26-35y: 32 (43.2)<br>36-45y: 14 (18.9)<br>46-55y: 12 (16.2)<br>56-64y: 1 (1.4)<br>Non-MSM<br>18-25y: 142 (31.4)<br>26-35y: 99 (21.8)                                                                                                                                                                   | The largest proportion of IMD cases reported as MSM occurred among men aged 26–35 years (43.2%) and for non-MSM cases among men aged 18–25 years (31.4%). There is inequality in IMD incidence across age groups in MSM and non-MSM groups.                                                                                                                                        |

|                              |                                                          |                         |                                                                                                                                                                                                                                                                                                              |                                                                                                                                                                                                       |
|------------------------------|----------------------------------------------------------|-------------------------|--------------------------------------------------------------------------------------------------------------------------------------------------------------------------------------------------------------------------------------------------------------------------------------------------------------|-------------------------------------------------------------------------------------------------------------------------------------------------------------------------------------------------------|
|                              |                                                          |                         | 36-45y: 61 (13.5)<br>46-55y: 87 (19.2)<br>56-64y: 64 (14.1)<br>p<0.001                                                                                                                                                                                                                                       |                                                                                                                                                                                                       |
| Folaranmi 2017 <sup>29</sup> | N=527 MSM and non-MSM with IMD                           | Sex /sexual orientation | Proportion of individuals n (%)<br>MSM (as per serogroup)<br>B: 5 (6.8)<br>C: 62 (83.8)<br>W: 2 (2.7)<br>Y: 3 (4.1)<br>Other: 1 (1.4)<br>Unknown: 1 (1.4)<br>Non-MSM (as per serogroup)<br>B: 125 (27.6)<br>C: 98 (21.6)<br>W: 51 (11.3)<br>Y: 75 (16.6)<br>Other: 32 (7.1)<br>Unknown: 72 (15.9)<br>p<0.001 | The largest proportion of IMD cases reported in MSM had serogroup C and serogroup B for non-MSM. There were inequalities in incidence of different IMD serogroups for MSM and non-MSM groups.         |
| Folaranmi 2017 <sup>29</sup> | N=527 MSM and non-MSM with IMD                           | Sex /sexual orientation | RR (95% CI) (MSM vs. Non-MSM): 4.0 (3.1-5.1);<br>p<0.001                                                                                                                                                                                                                                                     | IMD incidence was significantly higher in MSM compared to non-MSM. Hence, there is an inequality in IMD risk between these two groups.                                                                |
| Bloch 2018 <sup>20</sup>     | N=151 aged ≥15y with IMD                                 | Sex /sexual orientation | Annual incidence rate per 100,000 persons:<br>Males: 0.3 per 100,000 persons<br>Females: 0.2 per 100,000 persons                                                                                                                                                                                             | Incidence rate was similar between sexes.                                                                                                                                                             |
| Mbaeyi 2019 <sup>32</sup>    | N=3,686 IMD cases (sporadic and outbreaks) aged <1y-≥65y | Sex /sexual orientation | Incidence proportion n (%):<br>For sporadic cases; 1,719 (49.4) in male; 1,758 (50.6) in females<br>For outbreak-associated cases; 117 (65.4) in male; 62 (34.6) in females                                                                                                                                  | Outbreak-associated cases reported to have more males (numerically), while sporadic cases observed to have similar proportion of either sex. There is an inequality in IMD sporadic cases as per sex. |
| Mbaeyi 2019 <sup>32</sup>    | N=112 IMD cases (sporadic and outbreaks) aged <1y-≥65y   | Sex /sexual orientation | Median number (range) of cases in outbreaks: 13 (4-22) for MSM cohort; 3 (2-14) for non-MSM cohort                                                                                                                                                                                                           | MSM reported to have higher number of meningococcal disease cases as compared to non-MSM population. Numerically, there is an inequality in incidence of IMD cases as per sexual orientation.         |
| Mandal 2013 <sup>30</sup>    | N=42 confirmed IMD (n=7) and matched controls (n=35)     | Sex /sexual orientation | Proportion n (%): 5 (71.4) and 18 (51.4) males in cases and controls, respectively; OR (95% CI) (cases vs. controls): 2.36 (0.32–29.6)                                                                                                                                                                       | Proportion of males did not differ significantly between cases and controls                                                                                                                           |

|                              |                                                              |                         |                                                                                                                                                                                                                                                                                   |                                                                                                                                                                                                                                                 |
|------------------------------|--------------------------------------------------------------|-------------------------|-----------------------------------------------------------------------------------------------------------------------------------------------------------------------------------------------------------------------------------------------------------------------------------|-------------------------------------------------------------------------------------------------------------------------------------------------------------------------------------------------------------------------------------------------|
| Mandal 2013 <sup>30</sup>    | N=42 confirmed IMD (n=7) and matched controls (n=35)         | Sex /sexual orientation | Proportion n (%):3 (42.9) and 9 (25.7) >1 sexual partner in cases and controls, respectively; OR (95% CI) (cases vs. controls): 1.97 (0.27-12.56)                                                                                                                                 | Having >1 sexual partner was not significantly different between cases and controls.                                                                                                                                                            |
| Ridpath 2015 <sup>25</sup>   | N=68 MSM with outbreak MenC (n=17) vs MSM with no IMD (n=51) | Sex /sexual orientation | Matched OR (95% CI): 2.8 (0.7–13.7) for cohort of sex with >1 man during month before illness onset; 1.8 (0.4–10.6) for cohort of met a male sex partner during month before illness onset online or at bar or party versus other ways                                            | Having sex with >1 man during month before illness onset or meeting a male sex partner during month before illness onset online or at bar or party versus other ways was not associated with the risk of IMD in this cohort of MSM individuals. |
| Ridpath 2015 <sup>25</sup>   | N=68 MSM with outbreak MenC (n=17) vs MSM with no IMD (n=51) | Sex /sexual orientation | Proportion of individuals n (%)<br>Gay: 15/17 (88.2) in cases; 45/50 (90.0) in controls<br>Bisexual: 2/17 (11.8) in cases; 5/50 (10.0) in controls                                                                                                                                | There was no difference in case proportion in gay and bisexual.                                                                                                                                                                                 |
| Folaranmi 2017 <sup>29</sup> | N=527 MSM and non-MSM with IMD                               | Ethnicity/ Race         | Proportion of individuals n (%)<br>MSM<br>Hispanic: 20 (27)<br>Non-Hispanic: 50 (67.6)<br>Unknown: 4 (5.4)<br>Non-MSM<br>Hispanic: 82 (18.1)<br>Non-Hispanic: 276 (60.9)<br>Unknown: 95 (21)<br>MSM vs non-MSM p=0.003                                                            | The largest proportion of IMD cases reported in MSM and non-MSM occurred among the non-Hispanic group when compared to the Hispanic and unknown groups. There is inequality in IMD incidence across ethnicities for both MSM and non-MSM.       |
| Folaranmi 2017 <sup>29</sup> | N=527 MSM and non-MSM with IMD                               | Ethnicity/ Race         | Proportion of individuals n (%)<br>MSM<br>White: 37 (50)<br>Black: 29 (39.2)<br>Asian: 2 (2.7)<br>Other: 3 (4.1)<br>Unknown: 3 (4.1)<br><br>Non-MSM<br>White: 268 (59.2)<br>Black: 92 (20.3)<br>Asian: 5 (1.1)<br>Other: 19 (4.2)<br>Unknown: 69 (15.2)<br>MSM vs non-MSM p<0.001 | The largest proportion of IMD cases reported in MSM and non-MSM occurred among the White group as compared to Black, Asian, Other or Unknown groups. There are inequalities in IMD incidence across racial and ethnic groups.                   |
| Ridpath 2015 <sup>25</sup>   | N=68 MSM with outbreak MenC (n=17)                           | Ethnicity/ Race         | Matched OR (95% CI): 8.0 (1.6–63.7) for Black race; p<0.05                                                                                                                                                                                                                        | Black race was significantly associated with IMD infection. Hence, there is an inequality in IMD incidence by race.                                                                                                                             |

|                            |                                                                                               |                 |                                                                                                                                                                                                                                                                                                       |                                                                                                                                                                                       |
|----------------------------|-----------------------------------------------------------------------------------------------|-----------------|-------------------------------------------------------------------------------------------------------------------------------------------------------------------------------------------------------------------------------------------------------------------------------------------------------|---------------------------------------------------------------------------------------------------------------------------------------------------------------------------------------|
|                            | vs MSM with no IMD (n=51)                                                                     |                 |                                                                                                                                                                                                                                                                                                       |                                                                                                                                                                                       |
| Mbaeyi 2019 <sup>32</sup>  | N=3,686 IMD cases (sporadic and outbreaks) aged <1y-≥65y                                      | Ethnicity/ Race | Incidence proportion n (%)<br>Sporadic<br>White: 2,251 (76.7)<br>Black: 492 (16.8)<br>Other: 191 (6.5)<br>Hispanic: 492 (18.7)<br>Not Hispanic: 2,141 (81.3)<br><br>Outbreak-associated<br>White: 104 (70.3)<br>Black: 30 (20.3)<br>Other: 14 (9.4)<br>Hispanic: 35 (24.3)<br>Not Hispanic: 109 (9.4) | Similar trend of having more cases of White and not Hispanics was observed across both outbreak-associated and sporadic population. An inequality was reported as per ethnicity/race. |
| Mandal 2013 <sup>30</sup>  | N=42 confirmed IMD (n=7) and matched controls (n=35)                                          | Ethnicity/ Race | Proportion n (%): 7 (100) and 31 (88.6) White non-Hispanic in cases and controls, respectively; OR (95% CI) (cases vs. controls): 1.06 (0.13-∞)                                                                                                                                                       | Proportion of White non-Hispanic did not differ significantly between cases and controls.                                                                                             |
| Mandal 2013 <sup>30</sup>  | N=42 confirmed IMD (n=7) and matched controls (n=35)                                          | Smoking         | Proportion n (%): 2 (28.6) and 4 (11.4) Regular smoker (on average ≥1 cigarette/d) in cases and controls, respectively; OR (95% CI) (cases vs. controls): 3.45 (0.22-53.02)                                                                                                                           | Proportion of regular smokers did not differ significantly between cases and controls                                                                                                 |
| Mandal 2013 <sup>30</sup>  | N=42 confirmed IMD (n=7) and matched controls (n=35)                                          | Smoking         | Proportion n (%): 5 (71.4) and 15 (42.9) second-hand smoke exposure in cases and controls, respectively; OR (95% CI) (cases vs. controls): 4.73 (0.46-244.1)                                                                                                                                          | Proportion of second-hand smokers did not differ significantly between cases and controls.                                                                                            |
| Ridpath 2015 <sup>25</sup> | N=68 MSM with outbreak MenC (n=17) vs MSM with no IMD (n=51)                                  | Smoking         | Matched OR (95% CI): 0.9 (0.2–3.3) for tobacco smoking                                                                                                                                                                                                                                                | Smoking was not associated with an increased risk of infection.                                                                                                                       |
| Ridpath 2015 <sup>25</sup> | N=68 MSM with outbreak MenC (n=17) vs MSM with no IMD (n=51) meningococcal disease (controls) | Alcohol         | Matched OR (95% CI): 1.2 (0.3–5.5) for shared a drink                                                                                                                                                                                                                                                 | Sharing a drink was not associated with increased risk of infection.                                                                                                                  |
| Mandal 2013 <sup>30</sup>  | N=42 confirmed IMD (n=7) and matched controls (n=35)                                          | Alcohol         | Proportion n (%): 7 (100) and 31 (88.6) Drinks alcohol in cases and controls, respectively; OR (95% CI) (cases vs. controls): 1.13 (0.11-∞)                                                                                                                                                           | Proportion of students who drink alcohol did not differ significantly between cases and controls                                                                                      |



|                            |                                                              |                           |                                                                                                                                                                                   |                                                                                                                                                                                                          |
|----------------------------|--------------------------------------------------------------|---------------------------|-----------------------------------------------------------------------------------------------------------------------------------------------------------------------------------|----------------------------------------------------------------------------------------------------------------------------------------------------------------------------------------------------------|
| Mandal 2013 <sup>30</sup>  | N=42 confirmed IMD (n=7) and matched controls (n=35)         | Alcohol                   | Proportion n (%): 7 (100) and 26 (74.3) Binge drinks in cases and controls, respectively; OR (95% CI) (cases vs. controls): 2.83 (0.39-∞)                                         | Proportion of binge drinkers did not differ significantly between cases and controls                                                                                                                     |
| Mandal 2013 <sup>30</sup>  | N=42 confirmed IMD (n=7) and matched controls (n=35)         | Pub/nightclub visits      | Proportion n (%): 6 (85.7) and 13 (37.1) Attends bars in cases and controls, respectively; OR (95% CI) (cases vs. controls): 8.06 (1.12-∞); (mOR, 8.06; P = 0.04)                 | A significantly greater proportion of cases attend bars than controls. There is inequality in IMD risk due to behaviours of 'attending bars' in university students.                                     |
| Mandal 2013 <sup>30</sup>  | N=42 confirmed IMD (n=7) and matched controls (n=35)         | Pub/nightclub visits      | Proportion n (%): 7 (100) and 30 (85.7) Attends parties in cases and controls, respectively; OR (95% CI) (cases vs. controls): 1.78 (0.13-∞)                                      | Proportion of cases and controls that attend parties did not differ significantly                                                                                                                        |
| Mandal 2013 <sup>30</sup>  | N=42 confirmed IMD (n=7) and matched controls (n=35)         | Illegal drug use          | Proportion n (%): 3 (42.9) and 10 (28.6) Uses marijuana in cases and controls, respectively; OR (95% CI) (cases vs. controls): 1.85 (0.23-12.81)                                  | Proportion of marijuana use did not differ significantly between cases and controls                                                                                                                      |
| Ridpath 2015 <sup>25</sup> | N=68 MSM with outbreak MenC (n=17) vs MSM with no IMD (n=51) | Illegal drug use          | Matched OR (95% CI): 0.5 (0.1-2.4); 16.6 (3.1-∞) (p<0.05) and 11.2 (1.8-∞) (p<0.05) for use of marijuana, methamphetamine and cocaine in month before illness onset, respectively | Use of methamphetamine and cocaine was significantly associated with the risk of IMD incidence in this cohort of MSM individuals. Hence, there is an inequality in IMD incidence by illegal drug usage.  |
| Mandal 2013 <sup>30</sup>  | N=42 confirmed IMD (n=7) and matched controls (n=35)         | Kissing                   | Proportion n (%): 4/6 (66.7) and 8 (22.9) >1 kissing partner in cases and controls, respectively; OR (95% CI) (cases vs. controls): 13.66 (1.23-708.7); (mOR, 13.66; P = 0.03)    | The proportion of cases having more than 1 kissing partner was significantly greater than for controls. There is inequality in IMD risk due to behaviors of '>1 kissing partner' in university students. |
| Ridpath 2015 <sup>25</sup> | N=68 MSM with outbreak MenC (n=17) vs MSM with no IMD (n=51) | Immuno-suppression status | Proportion of patients n (%) HIV-Infected: 10/17 (58.8) in cases; 13/51 (25.5) in controls                                                                                        | Numerically, higher proportion of cases were HIV-infected than controls. There is an inequality in IMD cases by immunosuppressive status.                                                                |

**Table S6. Inequalities in IMD mortality by individual characteristics/behaviors**

| Author Year              | Patients                 | Exposure                | IMD mortality                                                                                                                                                                 | Interpretation of impact on inequality                                                                                                           |
|--------------------------|--------------------------|-------------------------|-------------------------------------------------------------------------------------------------------------------------------------------------------------------------------|--------------------------------------------------------------------------------------------------------------------------------------------------|
| Bloch 2018 <sup>20</sup> | N=151 aged ≥15y with IMD | Age                     | Adjusted risk ratio (95% CI):<br>15-24 years: 0.61 (0.27-1.34); p >0.05<br>25-44 years: Ref<br>45-64 years: 0.79 (0.40-1.56); p >0.05<br>≥65 years: 0.55 (0.24-1.22); p >0.05 | Age was not associated with IMD mortality                                                                                                        |
| Bloch 2018 <sup>20</sup> | N=151 aged ≥15y with IMD | Sex /sexual orientation | Adjusted risk ratio (95% CI):<br>Male: Ref<br>Female: 2.14 (1.19-3.84); p<0.05                                                                                                | Adjusted risk ratio for mortality was significantly higher in females compared to males. Hence, there is inequality in IMD mortality due to sex. |

|                              |                                                                         |                           |                                                                                                                                                                                                                                               |                                                                                                                                                         |
|------------------------------|-------------------------------------------------------------------------|---------------------------|-----------------------------------------------------------------------------------------------------------------------------------------------------------------------------------------------------------------------------------------------|---------------------------------------------------------------------------------------------------------------------------------------------------------|
| Bloch 2018 <sup>20</sup>     | N=147 aged ≥15y with IMD                                                | Sex /sexual orientation   | Adjusted risk ratio (95% CI):<br>Male: Ref<br>Female: 13.70 (3.23-58.05); p<0.05                                                                                                                                                              | Among those with meningitis, females had significantly higher mortality than males. There is an inequality in IMD meningitis mortality due to sex.      |
| Bloch 2018 <sup>20</sup>     | N=151 aged ≥15y with IMD                                                | Ethnicity/ Race           | Adjusted risk ratio (95% CI):<br>Non-Hispanic White: Ref<br>Non-Hispanic Black: 1.46 (0.72-2.93); p>0.05<br>Hispanic: 0.74 (0.34-1.59); p>0.05<br>Asian/Pacific Islander: 1.24 (0.33-4.63); p>0.05<br>Unknown/other: 1.09 (0.34-3.47); p>0.05 | Race/ethnicity was not associated with IMD mortality.                                                                                                   |
| Folaranmi 2017 <sup>29</sup> | N=527 MSM and non-MSM with IMD                                          | Sex /sexual orientation   | Proportion of individuals n (%)<br>MSM: 24 (32.4)<br>Non-MSM: 90 (23.5)<br>p=0.112                                                                                                                                                            | Mortality was not significantly different between the MSM and non-MSM group.                                                                            |
| Blain 2021 <sup>19</sup>     | N=34 IMD patients previously vaccinated with MenACWY (aged 12-62 years) | Immuno-suppression status | Mortality proportion n (%)<br>Immunosuppressed: 1 (13)<br>Not known to be immunosuppressed: 4 (15); p=NS                                                                                                                                      | No significant difference in case fatality ratio between previously vaccinated immunosuppressed patients and patients not known to be immunosuppressed. |

**Table S7. Inequalities in IMD carriage by individual characteristics/behaviors**

| Author Year                  | Patients                       | Exposure | IMD carriage                                                                                                                                                                                                                                                  | Interpretation of impact on inequality                                                                                                                                                                             |
|------------------------------|--------------------------------|----------|---------------------------------------------------------------------------------------------------------------------------------------------------------------------------------------------------------------------------------------------------------------|--------------------------------------------------------------------------------------------------------------------------------------------------------------------------------------------------------------------|
| Harrison 2015 <sup>23</sup>  | N=3,311 high school students   | Age      | Carriage rate: 8.0% of students in grades 11 or 12, compared with 3.4% in grades 9 or 10 (P < .0001); older age (OR, 1.3; 95% CI, 1.2–1.5)                                                                                                                    | Positive association was found between carriage rate and students in higher grades. Per unit increase in age increases the risk of being a carrier by 1.3 times There is an inequality in carriage rate due to age |
| Breakwell 2018 <sup>56</sup> | N=1,837 undergraduate students | Age      | Prevalence ratios (95% CI) (median increase of age in years): 1.00 (0.98-1.03); p=0.75                                                                                                                                                                        | There was no association between IMD carriage and median increase in age.                                                                                                                                          |
| McNamara 2017 <sup>55</sup>  | N=4,225 healthy participants   | Age      | Prevalence ratio (95% CI):<br>18 years: Ref<br>19 years: 1.2 (0.9-1.6); p=0.3<br>20 years: 1.6 (1.1-2.3); p=0.02<br>21 years: 1.1 (0.7-1.8); p= 0.7<br>22 years: 0.8 (0.5-1.5); p=0.6<br>23-29 years: 0.8 (0.4-1.5); p=0.5<br>30+ years: 1.8 (0.7-5.2); p=0.4 | Participants 20 years of age had significant higher prevalence ratio of carriage than at 18 years. There is an inequality in carriage rate as per age category.                                                    |

|                              |                                |                         |                                                                                                                                                                                      |                                                                                                                                                                                                                                                                                                 |
|------------------------------|--------------------------------|-------------------------|--------------------------------------------------------------------------------------------------------------------------------------------------------------------------------------|-------------------------------------------------------------------------------------------------------------------------------------------------------------------------------------------------------------------------------------------------------------------------------------------------|
| McNamara 2017 <sup>55</sup>  | N=4,225 healthy participants   | Age                     | Prevalence ratio (95% CI):<br>18 years: Ref<br>19 years: 2.0 (0.9-4.6); p=0.09<br>20 years: 2.2 (0.9-5.6); p=0.1<br>21 years: 0.9 (0.3-3.0); p=0.9<br>22 years: 2.6 (0.9-7.4); p=0.1 | There was no association between MenB carriage rate and age.                                                                                                                                                                                                                                    |
| Breakwell 2018 <sup>56</sup> | N=1,837 undergraduate students | Sex /sexual orientation | Adjusted prevalence ratios (95% CI) (male vs. female):<br>1.66 (1.29-2.14); p<0.01                                                                                                   | Prevalence of IMD carriage is significantly greater in males than females indicating an inequality between sexes.                                                                                                                                                                               |
| McNamara 2017 <sup>55</sup>  | N=4,225 healthy participants   | Sex /sexual orientation | Prevalence ratio (95% CI):<br>Female: Ref<br>Male: 1.2 (1.0-1.5); p=0.03                                                                                                             | Males had significantly higher carriage prevalence rate than females. There is an inequality in carriage rate between sexes.                                                                                                                                                                    |
| McNamara 2017 <sup>55</sup>  | N=4,225 healthy participants   | Sex /sexual orientation | Prevalence ratio (95% CI):<br>Female: Ref<br>Male: 1.0 (0.6-1.6); p=0.9                                                                                                              | There was no association between MenB carriage rate and sex.                                                                                                                                                                                                                                    |
| Harrison 2015 <sup>23</sup>  | N=3,311 high school students   | Ethnicity/Race          | Carriage rate: 8% White race vs. 2.1% other races (P < .0001); [OR], 3.2; 95% CI, 2.1–4.9                                                                                            | Positive correlations were reported between race and carriage rate: Participants from White race had significantly 3.2 times higher carriage rate compared to other races. Race was a risk factor for IMD carriage. There is an inequality in carriage rate due to race in high school students |
| Harrison 2015 <sup>23</sup>  | N=3,311 high school students   | Smoking                 | Carriage rate: 12.1% of current smokers, compared with 5.0% of non-smokers (P < .0001); being a current smoker (OR, 1.6; 95% CI, 1.1–2.4)                                            | Positive association was reported between carriage rate and being a current smoker. Smokers had significantly 1.6 times higher carriage rates compared to non-smokers. Smoking was a risk factor for IMD carriage. There is an inequality in carriage rate due to smoking status                |
| Breakwell 2018 <sup>56</sup> | N=1,837 undergraduate students | Smoking                 | Adjusted prevalence ratios (95% CI):<br>No tobacco or marijuana use in the past 30 days: Ref<br>Tobacco or marijuana use in past 30 days: 1.53 (1.21-1.94); p<0.01                   | Tobacco/marijuana use in the past 30 days was significantly associated with adjusted carrier prevalence ratio. There is an inequity in carriage prevalence ratio as per smoking behaviour.                                                                                                      |
| Breakwell 2018 <sup>56</sup> | N=1,837 undergraduate students | Smoking                 | Adjusted prevalence ratios (95% CI):<br>No second-hand smoke exposure in the past 30 days: Ref<br>Second-hand smoke exposure in the past 30 days: 1.17 (0.91-1.51); p=0.23           | There was no association between carriage prevalence ratio and exposure to second-hand smoke.                                                                                                                                                                                                   |
| McNamara 2017 <sup>55</sup>  | N=4,225 healthy participants   | Smoking                 | Prevalence ratio (95% CI):<br>No: Ref<br>Yes: 1.4 (1.2-1.7); p= 0.0008                                                                                                               | Smokers had significantly higher carriage rate than non-smokers. There is an inequality in carriage rate as per smoking status.                                                                                                                                                                 |

|                              |                                |                      |                                                                                                                                                               |                                                                                                                                                                                                                                                                                                                             |
|------------------------------|--------------------------------|----------------------|---------------------------------------------------------------------------------------------------------------------------------------------------------------|-----------------------------------------------------------------------------------------------------------------------------------------------------------------------------------------------------------------------------------------------------------------------------------------------------------------------------|
| McNamara 2017 <sup>55</sup>  | N=4,225 healthy participants   | Smoking              | Prevalence ratio (95% CI):<br>Never: Ref<br>Some days: 1.1 (0.9-1.3); p=0.4<br>Every day: 1.2 (0.8-1.7); p=0.4                                                | There was no association between exposure to second-hand smoke and IMD carriage.                                                                                                                                                                                                                                            |
| McNamara 2017 <sup>55</sup>  | N=4,225 healthy participants   | Smoking              | Prevalence ratio (95% CI):<br>No: Ref<br>Yes: 2.0 (1.1-3.6); p=0.02                                                                                           | Smokers had significantly higher MenB carriage rate than non-smokers. There is an inequality in MenB carriage rate as per smoking status.                                                                                                                                                                                   |
| McNamara 2017 <sup>55</sup>  | N=4,225 healthy participants   | Smoking              | Prevalence ratio (95% CI):<br>Second-hand smoke<br>Never: Ref<br>Some days: 1.3 (0.8-2.0); p=0.3<br>Every day: 1.6 (0.6-4.1); p=0.5                           | There was no association between MenB carriage rate and exposure to second-hand smoke.                                                                                                                                                                                                                                      |
| Breakwell 2018 <sup>56</sup> | N=1,837 undergraduate students | Pub/nightclub visits | Adjusted prevalence ratios (95% CI):<br>Frequents bars/parties <1 time/week: Ref<br>Frequents bars/parties ≥1 time/week: 2.03 (1.52-2.72); p<001              | There was a positive correlation of IMD carriage with frequency of visiting bar/parties. Adjusted carrier prevalence ratio was significantly higher in participants visiting bar/parties ≥1 time/week, hence, there is an inequity in carriage prevalence ratio as per social gathering behaviour (attending bars/parties). |
| McNamara 2017 <sup>55</sup>  | N=4,225 healthy participants   | Pub/nightclub visits | Prevalence ratio (95% CI):<br><1/week or never: Ref<br>1/week: 2.0 (1.6-2.5); p<0.0001<br>2-3/week: 2.8 (2.2-3.6); p<0.0001<br>≥4/week: 2.7 (1.6-4.4); p=0.01 | Participants attending bars, clubs, parties had significantly higher carriage rate than those attending <1/week/never. There is an inequality in carriage rate as per frequency of social outings.                                                                                                                          |
| McNamara 2017 <sup>55</sup>  | N=4,225 healthy participants   | Pub/nightclub visits | Prevalence ratio (95% CI):<br><1/week or never: Ref<br>1/week: 1.3 (0.7-2.4); p=0.5<br>2-3/week: 2.3 (1.1-1.46); p=0.04<br>≥4/week: 3.0 (0.9-9.7); p=0.2      | Attending bars/clubs/parties 2-3 times a week had significantly higher MenB carriage prevalence rate than other categories. There is an inequality in MenB carriage rate as per frequency of social outings.                                                                                                                |

Table S8. Inequalities in IMD mortality by socioeconomic factors

| Author Year                | Patients                                                                                          | Exposure           | IMD mortality                                                                                                                                                                                | Interpretation of impact on inequality                                                                                                                |
|----------------------------|---------------------------------------------------------------------------------------------------|--------------------|----------------------------------------------------------------------------------------------------------------------------------------------------------------------------------------------|-------------------------------------------------------------------------------------------------------------------------------------------------------|
| Bloch 2018 <sup>20</sup>   | N=151 aged ≥15y with IMD                                                                          | Social deprivation | Adjusted risk ratio (95% CI):<br>Neighborhood poverty level<br>0-<10%: Ref<br>10%-<20%: 1.43 (0.60-3.41); p>0.05<br>20%-<30%: 1.70 (0.62-4.70); p>0.05<br>30%-100%: 1.86 (0.71-4.86); p>0.05 | IMD-related mortality was not associated with neighborhood poverty level.                                                                             |
| Mbaeyi 2019 <sup>31</sup>  | N=163 confirmed/<br>probable IMD in<br>students (ages 18-24y)                                     | Education level    | Mortality proportion: 10 (13%) in college students vs. 9 (11.8%) in non-college students                                                                                                     | No difference observed in the proportion who died between college and non-college groups.                                                             |
| Rudmann 2022 <sup>28</sup> | PEH and not known to<br>be experiencing<br>homelessness (non-PEH)<br>with IMD<br>Ages <18 or ≥18y | Homelessness       | Mortality n (%): 2 (4.4%) in PEH cohort vs. 166 (12.5%) in non-PEH cohort; p=NS                                                                                                              | Case fatality ratio (CFR) was not significantly different between the two groups although the CFR among PEH was less than half of that among non-PEH. |

Table S9. Inequalities in IMD incidence by socioeconomic factors

| Author Year                      | Patients                                                                                                                                         | Included in the Analysis                      | Specific Exposure         | Summary Statistic: Analysis Type, Statistical Data                                                                                                                                                                                                                                                                                                                                                                                                                                                         | Interpretation of impact on Inequality                                                                                                                                                                                  |
|----------------------------------|--------------------------------------------------------------------------------------------------------------------------------------------------|-----------------------------------------------|---------------------------|------------------------------------------------------------------------------------------------------------------------------------------------------------------------------------------------------------------------------------------------------------------------------------------------------------------------------------------------------------------------------------------------------------------------------------------------------------------------------------------------------------|-------------------------------------------------------------------------------------------------------------------------------------------------------------------------------------------------------------------------|
| Krishnarajah, 2014 <sup>21</sup> | Adult Medicaid and commercially insured populations (from 2006 to 2010, aged within the range of 19-64 years)                                    | Medicaid: 1,658,054<br>Commercial: 2,800,0862 | Insurance status and type | Mean incidence proportion (per 100,000) for year 2006-2010: 14.7 (95% CI: 13.9-15.6) for Medicaid vs. 2.2 (95% CI: 2.2-2.3) for Commercial<br><br>Medicaid<br>2006: 8.2 (95% CI: 7.1-9.6)<br>2007: 12.8 (95% CI: 11.0-14.8)<br>2008: 21.1 (95% CI: 18.9-23.6)<br>2009: 14.9 (95% CI: 13.1-16.8)<br>2010: 18.1 (95% CI: 16.1-20.3)<br><br>Commercial<br>2006: 1.6 (95% CI: 1.4-1.8)<br>2007: 2.3 (95% CI: 2.2-2.5)<br>2008: 2.3 (95% CI: 2.1-2.5)<br>2009: 2.8 (95% CI: 2.6-3)<br>2010: 2.1 (95% CI: 2-2.3) | Medicaid population had a numerically higher incidence of meningococcal disease compared to the commercial population. There is inequality due to type of insurance on the incidence proportion of meningococcal cases. |
| Krishnarajah, 2014 <sup>21</sup> | Adult Medicaid and commercially insured populations (from 2006 to 2010, aged within the range of 19-64 years)                                    | Medicaid: 1,629,543<br>Commercial: 32,929,132 | Insurance status and type | Mean Incidence proportion (95% CI) (per 100,000) for year 2010: 26.2 (95% CI: 22.9-29.8) for Medicaid vs. 2.0 (95% CI: 1.9-2.2) for Commercial; p<0.001                                                                                                                                                                                                                                                                                                                                                    | Incidence of meningococcal disease was significantly higher in Medicaid population. There is inequality due to type of insurance on the incidence proportion of meningococcal cases.                                    |
| Ridpath, 2015 <sup>25</sup>      | Men who have sex with men (MSM) with outbreak-related serogroup C meningococcal disease (cases) and MSM without meningococcal disease (controls) | 68 (17 cases, 51 controls)                    | Insurance status and type | Proportion of individuals n (%)<br>Health insurance: yes: 9/14 (64.3) in cases; 48/51 (94.1) in controls                                                                                                                                                                                                                                                                                                                                                                                                   | Numerically, lower proportion of cases were insured than the controls indicating that those who can afford insurance are less likely to get IMD. There is an inequality in IMD cases by insurance status.               |
| Ridpath, 2015 <sup>25</sup>      | Men who have sex with men (MSM) with outbreak-related serogroup C                                                                                | 68 (17 cases, 51 controls)                    | Education level           | Proportion of individuals n (%)<br>High school, GED or less: 5/15 (33.3) in cases; 5/50 (10.0) in controls                                                                                                                                                                                                                                                                                                                                                                                                 | Numerically, greater proportion of cases had education level of high school, GED or less, and fewer cases were in the college group than                                                                                |

|                            |                                                                                |                           |                                                   |                                                                                                                                                                                                                                                                                                                                                                                                                                                                                                                                                                                                                                                                                                                                                                                                                                                                                                                                        |                                                                                                                                                                                                                                                                          |
|----------------------------|--------------------------------------------------------------------------------|---------------------------|---------------------------------------------------|----------------------------------------------------------------------------------------------------------------------------------------------------------------------------------------------------------------------------------------------------------------------------------------------------------------------------------------------------------------------------------------------------------------------------------------------------------------------------------------------------------------------------------------------------------------------------------------------------------------------------------------------------------------------------------------------------------------------------------------------------------------------------------------------------------------------------------------------------------------------------------------------------------------------------------------|--------------------------------------------------------------------------------------------------------------------------------------------------------------------------------------------------------------------------------------------------------------------------|
|                            | meningococcal disease (cases) and MSM without meningococcal disease (controls) |                           |                                                   | At least some college: 10/15 (66.7) in cases; 45/50 (90.0) in controls                                                                                                                                                                                                                                                                                                                                                                                                                                                                                                                                                                                                                                                                                                                                                                                                                                                                 | controls. There is an inequality in IMD cases by education level.                                                                                                                                                                                                        |
| Mandal, 2013 <sup>30</sup> | Confirmed meningococcal disease (cases) and matched controls                   | 42 (7 cases, 35 controls) | Education level                                   | Proportion n (%): 2 (28.6) and 16 (45.7) Honours student, GPA $\geq$ 3.5 in cases and controls, respectively; OR (95% CI) (cases vs. controls): 0.45 (0.03-3.58)                                                                                                                                                                                                                                                                                                                                                                                                                                                                                                                                                                                                                                                                                                                                                                       | Proportion of honours students did not differ significantly between cases and controls                                                                                                                                                                                   |
| Mbaeyi, 2019 <sup>31</sup> | All confirmed and probable meningococcal cases in students aged 18-24 years    | 163                       | Education level (stratified by age and serogroup) | <p>Relative risk:<br/> All cases (college students vs. non-college students)<br/> 18 to 24 years: 1.67<br/> 18 to 19 years: 2<br/> 20 to 21 years: 1.42<br/> 22 to 24 years: 0.36</p> <p>Serogroup B (college students vs. non-college students)<br/> 18 to 24 years: 3.54<br/> 18 to 19 years: 3.1<br/> 20 to 21 years: 4.14<br/> 22 to 24 years: 0.28</p> <p>Serogroups C, W or Y (college students vs. non-college students)<br/> 18 to 24 years: 0.56<br/> 18 to 19 years: 2.76<br/> 20 to 21 years: 0.48<br/> 22 to 24 years: 0.16</p> <p>Average annual incidence (cases per 100,000 population)<br/> All cases 18 to 24 years: 0.2315 for college student vs. 0.1384 for non-college students<br/> Stratified by age groups:<br/> 18 to 19 years:<br/> College students: 0.3777<br/> Non-college students: 0.1888<br/> 20 to 21 years:<br/> College students: 0.2333<br/> Non-college students: 0.1639<br/> 22 to 24 years:</p> | College students were at an increased numerical risk for meningococcal disease compared with non-college students aged 18 to 24 years, especially in serogroup B cases. There is an inequality in incidence of IMD in freshman college students and non-college students |

|                             |                                                                                                                 |                            |                                                  |                                                                                                                                                                                                                                                                                                                                                                                                                                                                                                                                                                                                                                                                                                                                                                                                                              |                                                                                                   |
|-----------------------------|-----------------------------------------------------------------------------------------------------------------|----------------------------|--------------------------------------------------|------------------------------------------------------------------------------------------------------------------------------------------------------------------------------------------------------------------------------------------------------------------------------------------------------------------------------------------------------------------------------------------------------------------------------------------------------------------------------------------------------------------------------------------------------------------------------------------------------------------------------------------------------------------------------------------------------------------------------------------------------------------------------------------------------------------------------|---------------------------------------------------------------------------------------------------|
|                             |                                                                                                                 |                            |                                                  | <p>College students: 0.0393<br/>Non-college students: 0.1077</p> <p>Stratified by serogroup and age:<br/>Serogroup B<br/>18 to 24 years<br/>College students: 0.1673<br/>Non-college students: 0.0485<br/>18 to 19 years<br/>College students: 0.2795<br/>Non-college students: 0.0903<br/>20 to 21 years<br/>College students: 0.1770<br/>Non-college students: 0.0428<br/>22 to 24 years<br/>College students: 0.0098<br/>Non-college students: 0.0348</p> <p>Serogroups C, W or Y<br/>18 to 24 years<br/>College students: 0.0279<br/>Non-college students: 0.0502<br/>18 to 19 years<br/>College students: 0.0453<br/>Non-college students: 0.0164<br/>20 to 21 years<br/>College students: 0.0241<br/>Non-college students: 0.0499<br/>22 to 24 years<br/>College students: 0.0098<br/>Non-college students: 0.0634</p> |                                                                                                   |
| Mandal, 2013 <sup>30</sup>  | Confirmed meningococcal disease (cases) and matched controls                                                    | 42 (7 cases, 35 controls)  | Education level of parents in the case of minors | Proportion n (%): 6/6 (100) and 28 (80) Parental college education in cases and controls, respectively; OR (95% CI) (cases vs. controls): 2.41 (0.27-∞)                                                                                                                                                                                                                                                                                                                                                                                                                                                                                                                                                                                                                                                                      | % of parents with a college education was not significantly different between cases and controls. |
| Ridpath, 2015 <sup>25</sup> | Men who have sex with men (MSM) with outbreak-related serogroup C meningococcal disease (cases) and MSM without | 68 (17 cases, 51 controls) | Unemployment and job security                    | Proportion of individuals n (%)<br>Employed: 12/17 (70.6) in cases; 41/51 (80.4) in controls                                                                                                                                                                                                                                                                                                                                                                                                                                                                                                                                                                                                                                                                                                                                 | The proportion of cases and controls in the employed group did not differ.                        |



|                             |                                                                                                                                                  |                            |                                                       |                                                                                                                                                                                                                                                                                                                                                                                                                                                                                                                                  |                                                                                                                                                                                                                                              |
|-----------------------------|--------------------------------------------------------------------------------------------------------------------------------------------------|----------------------------|-------------------------------------------------------|----------------------------------------------------------------------------------------------------------------------------------------------------------------------------------------------------------------------------------------------------------------------------------------------------------------------------------------------------------------------------------------------------------------------------------------------------------------------------------------------------------------------------------|----------------------------------------------------------------------------------------------------------------------------------------------------------------------------------------------------------------------------------------------|
|                             | meningococcal disease (controls)                                                                                                                 |                            |                                                       |                                                                                                                                                                                                                                                                                                                                                                                                                                                                                                                                  |                                                                                                                                                                                                                                              |
| Ridpath, 2015 <sup>25</sup> | Men who have sex with men (MSM) with outbreak-related serogroup C meningococcal disease (cases) and MSM without meningococcal disease (controls) | 68 (17 cases, 51 controls) | Wealth                                                | Proportion of individuals n (%)<br>Annual household income:<br><\$29,999: 9/13 (69.3) in cases; 15/46 (32.6) in controls<br>\$30,000 – 59,999: 3 /13 (23.1) in cases; 8/46 (17.4) in controls<br>>\$60,000: 1/13 (7.7) in cases; 23/46 (50.0) in controls                                                                                                                                                                                                                                                                        | A numerically greater proportion of cases than controls in the <\$29,999; but also, there is a numerically smaller proportion of cases than controls in the >\$60,000. There is an inequality in IMD cases by annual household income level. |
| Rudmann, 2022 <sup>28</sup> | PEH and not known to be experiencing homelessness (non-PEH) with IMD aged either less than or more than or equal to 18 years                     | 1409                       | Homelessness (overall and stratified by age subgroup) | Estimated incidence (per 100,000): 2.12 in people experiencing homelessness (PEH) vs. 0.11 in non-PEH; RR (95% CI): 19.8 (14.8-26.7)<br><br>Sporadic case incidence (per 100,000): 1.27 in PEH vs. 0.10 in non-PEH; RR (95% CI): 12.8 (8.8-18.8)<br><br>Estimated incidence in adults aged 18 and older (per 100,000): 2.54 in PEH vs. 0.10 in non-PEH; RR (95% CI): 24.6 (18.1- 33.3)<br><br>Sporadic case incidence in adults aged 18 and older (per 100,000): 1.60 in PEH vs. 0.09 in non-PEH; RR (95% CI): 16.8 (11.5- 24.7) | IMD incidence risk was higher in the PEH cohort than non-PEH. The risk was also higher in the adult PEH cohort. There is inequity in IMD risk among PEH compared with non-PEH.                                                               |
| Mandal, 2013 <sup>30</sup>  | Confirmed meningococcal disease (cases) and matched controls                                                                                     | 42 (7 cases, 35 controls)  | Organisation/community                                | Proportion n (%): 3 (42.9) and 1 (2.9) Greek society member; OR (95% CI) (cases vs. controls): 15 (1.2-787.5); p = 0.03                                                                                                                                                                                                                                                                                                                                                                                                          | A significantly greater proportion of cases had Greek society membership than controls. There is an inequality for students with Greek society membership.                                                                                   |
| Mandal, 2013 <sup>30</sup>  | Confirmed meningococcal disease (cases) and matched controls                                                                                     | 42 (7 cases, 35 controls)  | Organisation/community                                | Proportion n (%): 3 (42.9) and 8 (22.9) Sports team member in cases and controls, respectively; OR (95% CI) (cases vs. controls): 2.18 (0.31-13.54)                                                                                                                                                                                                                                                                                                                                                                              | % of individuals who are part of a sports team was not significantly different between cases and controls.                                                                                                                                   |
| Mandal, 2013 <sup>30</sup>  | Confirmed meningococcal disease (cases) and matched controls                                                                                     | 42 (7 cases, 35 controls)  | Organisation/community                                | Proportion n (%): 1 (14.3) and 13 (37.1) Other club member (e.g., academic/literary/performing arts) in cases and controls, respectively; OR (95% CI) (cases vs. controls): 0.30 (0.006-2.8)                                                                                                                                                                                                                                                                                                                                     | % of individuals having another club membership was not significantly different between cases and controls                                                                                                                                   |

Table S10. Inequalities in IMD carriage by socioeconomic factors

| Study Name<br>Author, Year    | Brief Patient<br>Characteristics                         | Included<br>in the<br>Analysis | Specific<br>Exposure | Summary Statistic: Analysis Type, Statistical Data                                                                                                                 | Interpretation of Impact on Inequality                                   |
|-------------------------------|----------------------------------------------------------|--------------------------------|----------------------|--------------------------------------------------------------------------------------------------------------------------------------------------------------------|--------------------------------------------------------------------------|
| McNamara, 2017 <sup>55</sup>  | Healthy participants (to assess carriage rate)           | 4,225                          | Education level      | Prevalence ratio (95% CI):<br>Freshman: Ref<br>Sophomore: 0.8 (0.6-1.1); p=0.2<br>Junior: 0.7 (0.5-1.1); p=0.2<br>Senior: 0.8 (0.5-1.4); p=0.5                     | There was no association between year in school and carriage prevalence. |
| McNamara, 2017 <sup>55</sup>  | Healthy participants (to assess carriage rate)           | 4,225                          | Education level      | Prevalence ratio (95% CI):<br>Freshman: Ref<br>Sophomore: 1.6 (0.9-2.8); p=0.09<br>Junior: 0.9 (0.5-1.8); p=0.8<br>Senior: 1.3 (0.7-2.3); p=0.4                    | There was no association between MenB carriage rate and education level. |
| Breakwell, 2018 <sup>56</sup> | Undergraduate students tested for meningococcal carriage | 1,837                          | Education level      | Prevalence ratios (95% CI) (Freshman as reference):<br>Sophomore: 1.19 (0.84-1.70); p=0.32<br>Junior: 1.01 (0.69-1.47); p=0.97<br>Senior: 1.07 (0.76-1.52); p=0.69 | There was no association between IMD carriage and education level.       |

Table S11. Inequalities in IMD mortality by environmental factors

| Study Name<br>Author, Year | Brief Patient Characteristics                                                       | Included<br>in the<br>Analysis | Specific<br>Exposure       | Summary Statistic: Analysis Type, Statistical Data                               | Interpretation of Impact on Inequality                                                                                                                               |
|----------------------------|-------------------------------------------------------------------------------------|--------------------------------|----------------------------|----------------------------------------------------------------------------------|----------------------------------------------------------------------------------------------------------------------------------------------------------------------|
| Mbaeyi, 2019 <sup>32</sup> | Cases of meningococcal disease (sporadic and outbreak-associated) aged <1-≥65 years | 180                            | Organisation/<br>community | Mortality n (%): 13 (19.1%) in organisation cases; 30 (27.3%) in community cases | Numerically, higher number of individuals died in community-based outbreaks as compared to organisation-based ones. There was inequality reported for IMD mortality. |

Table S12. Inequalities in IMD incidence by environmental factors

| Study Name<br>Author, Year    | Brief Patient Characteristics                                                                                                                    | Included<br>in the<br>Analysis | Specific<br>Exposure       | Summary Statistic: Analysis Type, Statistical<br>Data                                                                                                                                                                       | Interpretation of Impact on Inequality                                                                                                                                               |
|-------------------------------|--------------------------------------------------------------------------------------------------------------------------------------------------|--------------------------------|----------------------------|-----------------------------------------------------------------------------------------------------------------------------------------------------------------------------------------------------------------------------|--------------------------------------------------------------------------------------------------------------------------------------------------------------------------------------|
| Mbaeyi, 2019 <sup>32</sup>    | Cases of meningococcal disease (sporadic and outbreak-associated) aged <1-≥65 years                                                              | 68                             | Organisation/co<br>mmunity | Median number (range) of cases in outbreaks: 3 (2-10) for university; 3 (2-8) for other organisation                                                                                                                        | Similar numbers of meningococcal cases were observed across both university and other organisation type outbreaks.                                                                   |
| Mandal, 2013 <sup>30</sup>    | Confirmed meningococcal disease (cases) and matched controls                                                                                     | 42 (7 cases, 35 controls)      | Housing and household size | Proportion n (%): 7 (100) and 34 (97.1) lived in a residence hall in cases and controls, respectively; OR (95% CI) (cases vs. controls): 0.20 (0.005-∞)                                                                     | Proportion of students living in a residence hall did not differ significantly between cases and controls                                                                            |
| Ridpath, 2015 <sup>25</sup>   | Men who have sex with men (MSM) with outbreak-related serogroup C meningococcal disease (cases) and MSM without meningococcal disease (controls) | 68 (17 cases, 51 controls)     | Housing and household size | Matched OR (95% CI): 3.7 (1.0–18.0) for household with >1 other person                                                                                                                                                      | Household size was not associated with risk of infection.                                                                                                                            |
| Ridpath, 2015 <sup>25</sup>   | Men who have sex with men (MSM) with outbreak-related serogroup C meningococcal disease (cases) and MSM without meningococcal disease (controls) | 68 (17 cases, 51 controls)     | Geographic location/region | Proportion of individuals n (%)<br>Brooklyn: 9/16 (56.3) in cases; 11/51 (21.6) in controls<br>Manhattan: 5/16 (31.3) in cases; 30/51 (58.8) in controls<br>Queens or Bronx: 2/16 (11.8) in cases; 10/51 (19.6) in controls | Numerically, the proportion of cases was highest in Brooklyn. There is an inequality in IMD cases by geographic area.                                                                |
| Folaranmi, 2017 <sup>29</sup> | Men who have sex with men (MSM) and non-MSM having meningococcal disease                                                                         | 527                            | Geographic location/region | RR (95% CI) (MSM vs. Non-MSM):<br>Geography subgroup<br>New York City: 15.2 (8.3-27.8); p<0.001<br>Los Angeles County: 14.6 (6.8-31.1); p<0.001<br>Chicago: 31.8 (9.8-103.3); p<0.001                                       | Incidence of IMD in MSM was significantly greater than non-MSM across US cities. This suggests inequalities in IMD incidence between MSM and non-MSM is not influenced by geography. |

Table S13. Inequalities in IMD carriage by environmental factors

| Study Name<br>Author, Year       | Brief Patient<br>Characteristics                         | Included<br>in the<br>Analysis | Specific<br>Exposure       | Summary Statistic: Analysis Type, Statistical Data                                                                                                                                      | Interpretation of Impact on Inequality                                             |
|----------------------------------|----------------------------------------------------------|--------------------------------|----------------------------|-----------------------------------------------------------------------------------------------------------------------------------------------------------------------------------------|------------------------------------------------------------------------------------|
| Breakwell, 2018<br><sup>56</sup> | Undergraduate students tested for meningococcal carriage | 1,837                          | Housing and household size | Adjusted prevalence ratios (95% CI):<br>Does not live in residence hall: Reference<br>Lives in residence hall: 0.85 (0.66-1.10); p= 0.23                                                | There was no association between IMD carriage and living in halls of residence.    |
| McNamara, 2017<br><sup>55</sup>  | Healthy participants (to assess carriage rate)           | 4,225                          | Housing and household size | Prevalence ratio (95% CI):<br>On-campus: Ref<br>Off-campus: 1.3 (0.7-2.2); p=0.4                                                                                                        | There was no association between living on/off-campus and carriage prevalence.     |
| McNamara, 2017<br><sup>55</sup>  | Healthy participants (to assess carriage rate)           | 4,225                          | Housing and household size | Prevalence ratio (95% CI):<br>Residence hall: Ref<br>Apartment/house: 0.9 (0.5-1.8); p=0.8<br>Sorority/fraternity: 1.3 (0.7-2.4); p=0.4                                                 | There was no association between housing type and carriage prevalence.             |
| McNamara, 2017<br><sup>55</sup>  | Healthy participants (to assess carriage rate)           | 4,225                          | Housing and household size | Prevalence ratio (95% CI):<br>On-campus: Ref<br>Off-campus: 1.2 (0.8-1.9); p=0.4                                                                                                        | There was no association between MenB carriage rate and living on- vs. off-campus. |
| McNamara, 2017<br><sup>55</sup>  | Healthy participants (to assess carriage rate)           | 4,225                          | Housing and household size | Prevalence ratio (95% CI):<br>Residence hall: Ref<br>Apartment/house: 1.4 (0.8-2.2); p=0.2<br>Sorority/fraternity: 2.0 (0.8-5.2); p=0.2                                                 | There was no association between MenB carriage rate and types of residence.        |
| McNamara, 2017<br><sup>55</sup>  | Healthy participants (to assess carriage rate)           | 4,225                          | Sharing bed/room           | Prevalence ratio (95% CI):<br>Number of roommates<br>0: Ref<br>1: 1.0 (0.7-1.4); p=1.0<br>2: 1.0 (0.7-1.5); p=1.0<br>3+: 1.2 (0.8-1.7); p=0.3<br>Live with family: 0.6 (0.3-1.4); p=0.2 | There was no association between number of roommates and carriage prevalence.      |
| McNamara, 2017<br><sup>55</sup>  | Healthy participants (to assess carriage rate)           | 4,225                          | Sharing bed/room           | Prevalence ratio (95% CI):<br>Roommates<br>0: Ref<br>1: 1.3 (0.5-3.7); p=0.6<br>2: 0.7 (0.2-2.7); p=0.7<br>3+: 1.5 (0.5-4.1); p=0.4                                                     | There was no association between MenB carriage rate and number of roommates.       |

Table S14. Inequalities in IMD prevention

| Study Name Author, Year   | Brief Patient Characteristics                       | Included in the Analysis | IMD Outcome                 | Exposure                                           | Specific Exposure                  | Summary Statistic: Analysis Type, Statistical Data                                                                                                                                                                                                                                                                                                                                                                                                                                                                                                                                                                                                                                                                                                                                                                                                                                                                                                                                                                                                                                                                               | Interpretation of Impact on Inequality                                                                                                                                                                                                                                                                                                                                                                                                                                              |
|---------------------------|-----------------------------------------------------|--------------------------|-----------------------------|----------------------------------------------------|------------------------------------|----------------------------------------------------------------------------------------------------------------------------------------------------------------------------------------------------------------------------------------------------------------------------------------------------------------------------------------------------------------------------------------------------------------------------------------------------------------------------------------------------------------------------------------------------------------------------------------------------------------------------------------------------------------------------------------------------------------------------------------------------------------------------------------------------------------------------------------------------------------------------------------------------------------------------------------------------------------------------------------------------------------------------------------------------------------------------------------------------------------------------------|-------------------------------------------------------------------------------------------------------------------------------------------------------------------------------------------------------------------------------------------------------------------------------------------------------------------------------------------------------------------------------------------------------------------------------------------------------------------------------------|
| Basta, 2019 <sup>27</sup> | Parents of teens attending high school in 2017-2018 | 445                      | Willingness to vaccinate    | Person's individual characteristics and behaviours | Childhood development              | <p>OR (95% CI):</p> <p>1) Willingness to vaccinate their child with MenB vaccine<br/>           Parents who were aware of at least one of the MenB vaccines compared with those who were not aware: 3.8 (1.2-12.2); p=0.03<br/>           Participants who were at least somewhat concerned about meningococcal disease compared to those not at all concerned: 3.1 (1.5-6.3); p=0.002</p> <p>2) Willingness to vaccinate their child with MenACWY vaccine<br/>           Parents who were aware of at least one of the MenACWY vaccines compared with those who were not aware: 6.3 (1.3-29.4); p=0.002<br/>           Participants who were at least somewhat concerned about meningococcal disease compared to those not at all concerned: 3.9 (1.8-8.4); p&lt;0.001</p> <p>3) Willingness to fully vaccinate their child<br/>           Parents who were aware of at least one of the vaccines compared with those who were not aware: 1.9 (1.1-3.2); p=0.02<br/>           Participants who were at least somewhat concerned about meningococcal disease compared to those not at all concerned: 2.0 (1.3-3.2); p=0.002</p> | Inequality in willingness to vaccinate child as per parental vaccine/disease awareness; Parents who were aware of at least one of the MenB/MenACWY vaccines compared with those who were not aware or who were at least somewhat concerned about meningococcal disease compared to those not at all concerned had significantly higher odds of being willing to vaccinate their child with MenB vaccine, with MenACWY vaccine and with enough doses to fully vaccinate their child. |
| Cheng, 2020 <sup>26</sup> | Adolescents aged 17 years                           | Unweighted: 22,928       | Vaccine uptake (completion) | Person's individual characteristics and behaviours | Gender identity/sexual orientation | <p>OR (95% CI):</p> <p>Male: Reference<br/>           Female: 0.63 (0.56-0.71); p &lt;0.001</p>                                                                                                                                                                                                                                                                                                                                                                                                                                                                                                                                                                                                                                                                                                                                                                                                                                                                                                                                                                                                                                  | Adolescents of female sex had significantly lower odds of series completion which indicates inequality in the completion rate of MenACWY primary and booster dose due to sex.                                                                                                                                                                                                                                                                                                       |

|  |  |                            |                             |                                                    |                                                                               |                                                                                                                                                                                                    |                                                                                                                                                                                                                                  |
|--|--|----------------------------|-----------------------------|----------------------------------------------------|-------------------------------------------------------------------------------|----------------------------------------------------------------------------------------------------------------------------------------------------------------------------------------------------|----------------------------------------------------------------------------------------------------------------------------------------------------------------------------------------------------------------------------------|
|  |  | Weighted:<br>3,948,<br>025 | Vaccine uptake (completion) | Person's individual characteristics and behaviours | Ethnicity/Race                                                                | OR (95% CI):<br>Non-Hispanic White: Reference<br>Non-Hispanic Black: 1.3 (1.05-1.61); p=0.016<br>Non-Hispanic other: 1.37 (1.09-1.71); p=0.006<br>Hispanic: 1.16 (1.02-1.32); p=0.024              | Significantly higher odds of series completion were found among adolescents who were Hispanic, non-Hispanic Black and non-Hispanic other race compared to non-Hispanic White indicates inequality as per ethnicity/race.         |
|  |  |                            | Vaccine uptake (completion) | Physical environment                               | Geographic location/region                                                    | Proportion (%)<br>Northeast: 28.7<br>Midwest: 24.7<br>South: 19.6<br>West: 23.5<br>P=NR                                                                                                            | No analyses were performed; however, the difference was reported numerically. Among Census regions, the lowest MenB vaccine coverage was in the South and the highest in the Northeast which indicates inequality as per region. |
|  |  |                            | Vaccine uptake (completion) | Social and economic factors                        | Insurance status and type                                                     | Proportion (%)<br>Private only: 24.8<br>Any Medicaid: 23.8<br>Other: 20.9<br>Uninsured: 11.1                                                                                                       | No analyses were performed; however, the difference was reported numerically. Lower vaccination completion rate was observed among uninsured adolescents which indicates inequity.                                               |
|  |  |                            | Vaccine uptake (completion) | Social and economic factors                        | Marital status                                                                | OR (95% CI):<br>Mother's marital status; married: 1.14 (1.01-1.28); p=0.035<br>Mother's marital status; not married: Reference                                                                     | Significantly higher odds of series completion were found among adolescents who had married mothers which indicates inequality due to marital status in the completion rate                                                      |
|  |  |                            | Vaccine uptake (completion) | Social and economic factors                        | Number of children <18 in household                                           | OR (95% CI):<br>Number of children <18 in household (ref.: 1)<br>2-3: 1.14 (1.03-1.27); p=0.013<br>≥4: 1.14 (0.97-1.34); p=0.102                                                                   | Significantly higher vaccination completion rate was observed in households with 2-3 <18-year-olds than households with 1 <18-year-olds which indicates inequality in vaccine completion rate.                                   |
|  |  |                            | Vaccine uptake (completion) | Social and economic factors                        | Wealth                                                                        | OR (95% CI):<br>Family income:<br>≤\$30,000: Reference<br>\$30,001-\$75,000: 1.05 (0.92-1.2); p=0.487<br>>\$75,000: 1.21 (1.02-1.45); p=0.033                                                      | Significantly higher odds of series completion were found among adolescents who had family income >\$75,000. There is an inequity due to family income in the completion rate of MenACWY primary and booster dose.               |
|  |  |                            | Vaccine uptake (completion) | Person's individual characteristics and behaviours | Access to care (Number of visits to healthcare professional in the past year) | OR (95% CI):<br>Number of visits to healthcare professional in the past year:<br>None: Reference<br>1: 1.36 (1.11-1.67); p=0.003<br>2-5: 1.52 (1.25-1.85); p<0.001<br>≥6: 1.44 (1.1-1.88); p=0.008 | Significantly higher odds of series completion were found among adolescents who had one or more visits to the healthcare professional in the past year compared to none.                                                         |
|  |  |                            | Vaccine uptake (completion) | Physical environment                               | Geographic location/region                                                    | Proportion (%)                                                                                                                                                                                     | No analyses were performed; however, the difference was reported numerically. Higher                                                                                                                                             |

|                             |                                                    |                                    |                                                                                                                                                                                                                                                                                                      |                                                                                                                                                                                                    |                                                                                                                                                  |
|-----------------------------|----------------------------------------------------|------------------------------------|------------------------------------------------------------------------------------------------------------------------------------------------------------------------------------------------------------------------------------------------------------------------------------------------------|----------------------------------------------------------------------------------------------------------------------------------------------------------------------------------------------------|--------------------------------------------------------------------------------------------------------------------------------------------------|
|                             |                                                    |                                    |                                                                                                                                                                                                                                                                                                      | Residence in a state with one-dose vaccination mandate by age 15; Yes: 30.3<br>Residence in a state with one-dose vaccination mandate by age 15; No: 20.2                                          | vaccine completion rate was observed among adolescents residing in a state with one-dose vaccination mandate by age 15 which indicates inequity. |
| Vaccine uptake (completion) | Physical environment                               | Geographic location/region         | OR (95% CI):<br>Residence in a state with booster dose vaccination mandate by age 17; Yes: 2.08 (1.48-2.93); p <0.001<br>Residence in a state with booster dose vaccination mandate by age 17; No: Reference                                                                                         | Significantly higher vaccine compliance rate was observed among adolescents residing in a state with booster dose vaccination mandate by age 17 which indicates inequality based on state mandate. |                                                                                                                                                  |
| Vaccine uptake (completion) | Social and economic factors                        | Healthcare expenditure             | OR (95% CI):<br>Paediatricians per 10,000 population ages 0–18 (per 10-unit increase)<br>0 to <7.6 (1st quartile): ref<br>7.6 to <8.9 (2nd quartile): 1.08 (0.75–1.57); p=0.664<br>8.9 to <11.8 (3rd quartile): 1.39 (0.89–2.18); p=0.151<br>11.8 to <56.5 (4th quartile): 1.69 (1.16–2.46); p=0.007 | Significantly higher completion rate when there are more paediatricians per 10,000 population ages 0–18 (per 10-unit increase) which indicates in inequality.                                      |                                                                                                                                                  |
| Vaccine uptake (completion) | Person's individual characteristics and behaviours | Access to care                     | OR (95% CI):<br>Whether teen had a 11–12-year-old well-child exam (ref.: No)<br>Yes: 1.41 (1.14–1.76); p=0.002                                                                                                                                                                                       | Significantly higher completion rate when teen had a 11–12-year-old well-child exam; which indicates inequality in vaccine completion rate.                                                        |                                                                                                                                                  |
| Vaccine uptake (completion) | Person's individual characteristics and behaviours | Comorbidity                        | Proportion (%)<br>Asthma history<br>Yes: 25.9<br>No: 22.5                                                                                                                                                                                                                                            | Children with a history of asthma had numerically higher vaccination completion rate than those without a history of asthma (no stats performed); which indicates numerical inequality.            |                                                                                                                                                  |
| Vaccine uptake (completion) | Person's individual characteristics and behaviours | Comorbidity                        | Proportion (%)<br>Any high-risk health conditions<br>Yes: 25.5<br>No: 23.0                                                                                                                                                                                                                           | Children with any high-risk health conditions had numerically higher vaccination completion rate than those without (no stats performed) which indicates numerical inequality in completion rate.  |                                                                                                                                                  |
| Vaccine uptake (completion) | Person's individual characteristics and behaviours | Comorbidity                        | OR (95% CI): Any high-risk health conditions among household members (ref.: No)<br>Yes 0.90 (0.79-1.01); p=0.083                                                                                                                                                                                     | No association of vaccine completion rate with presence of high-risk health conditions among household members.                                                                                    |                                                                                                                                                  |
| Vaccine uptake (completion) | Social and economic factors                        | Type of healthcare (Facility type) | OR (95% CI):<br>Facility type of vaccine providers (ref: Public)<br>Private: 1.56 (1.29–1.90); p<0.001<br>Hospital: 1.42 (1.10–1.83); p=0.007                                                                                                                                                        | Significantly higher completion rate for private, hospital, other/mixed/unknown compared to public provider. There is an inequity in vaccination completion rate.                                  |                                                                                                                                                  |

|                               |                                                    |  |                                                                 |                       |                                                                                                                                                                                                                                          |                                                                                                                                                                                                                                                          |
|-------------------------------|----------------------------------------------------|--|-----------------------------------------------------------------|-----------------------|------------------------------------------------------------------------------------------------------------------------------------------------------------------------------------------------------------------------------------------|----------------------------------------------------------------------------------------------------------------------------------------------------------------------------------------------------------------------------------------------------------|
|                               |                                                    |  |                                                                 | of vaccine providers) | Other/Mixed/Unknown: 1.49 (1.24–1.78); p<0.001                                                                                                                                                                                           |                                                                                                                                                                                                                                                          |
| Vaccine uptake (completion)   | Social and economic factors                        |  | Type of healthcare                                              |                       | OR (95% CI):<br>Whether teen’s providers report vaccinations to immunisation registry (ref: No providers)<br>Some providers: 1.15 (0.86-1.55); p=0.354<br>All providers: 1.31 (1.11-1.55); p=0.002<br>Unknown: 1.11 (0.91-1.34); p=0.299 | Significantly higher completion rate when all providers report vaccinations to immunisation registry compared to no providers which indicates inequality in vaccination completion.                                                                      |
| Vaccine uptake (completion)   | Person’s individual characteristics and behaviours |  | Access to care (Up-to-date Hep A vaccine)                       |                       | OR (95% CI):<br>Up-to-date Hep A vaccine<br>Yes: 2.37 (2.07-2.71); p<0.001<br>No: ref                                                                                                                                                    | Significantly higher completion rate when teen had up-to-date Hep A vaccine which indicates inequality in completion rate.                                                                                                                               |
| Vaccine uptake (completion)   | Person’s individual characteristics and behaviours |  | Access to care (Up-to-date Hep B vaccine)                       |                       | OR (95% CI):<br>Up-to-date Hep B vaccine<br>Yes: 1.77 (1.16-2.69); p=0.008<br>No: Ref                                                                                                                                                    | Significantly higher completion rate when teen had up-to-date Hep B vaccine which indicates inequality in completion rate.                                                                                                                               |
| Vaccine uptake (completion)   | Person’s individual characteristics and behaviours |  | Access to care (Up-to-date Varicella vaccine)                   |                       | OR (95% CI):<br>Up-to-date Varicella vaccine<br>Yes: 1.39 (1.19-1.63); p<0.001<br>No: ref                                                                                                                                                | Significantly higher completion rate when teen had up-to-date Varicella vaccine which indicates inequality in completion rate.                                                                                                                           |
| Vaccine uptake (completion)   | Person’s individual characteristics and behaviours |  | Access to care (Up-to-date HPV vaccine)                         |                       | OR (95% CI):<br>Up-to-date HPV vaccine<br>Yes: 2.77 (2.38-3.21); p<0.001<br>No: ref                                                                                                                                                      | Significantly higher completion rate when teen had up-to-date HPV vaccine which indicates inequality in completion rate.                                                                                                                                 |
| Vaccine uptake (completion)   | Person’s individual characteristics and behaviours |  | Access to care (Up-to-date Pneumococcal polysaccharide vaccine) |                       | Proportion (%)<br>Up-to-date Pneumococcal polysaccharide vaccine<br>Yes: 39.3<br>No: 22.4                                                                                                                                                | There is an inequality where a higher numerical vaccination completion rate is observed for teenagers who have up-to-date pneumococcal polysaccharide vaccination.                                                                                       |
| Vaccine uptake (completion)   | Person’s individual characteristics and behaviours |  | Access to care (Up-to-date Tdap vaccine)                        |                       | OR (95% CI):<br>Up-to-date Tdap vaccine<br>Yes: 3.03 (2.51-3.67); p<0.001<br>No: ref                                                                                                                                                     | Significantly higher completion rate when teen had up-to-date Tdap vaccine which indicates inequality in completion rate.                                                                                                                                |
| Vaccine adherence/ Compliance | Person’s individual characteristics and behaviours |  | Gender identity/sexual orientation                              |                       | OR (95% CI):<br>Male: Reference<br>Female: 0.67 (0.6-0.76); p<0.001                                                                                                                                                                      | Adolescents of female sex had significantly lower odds of compliance. There is inequality due to sex in the compliance rate of MenACWY primary and booster dose, where in adolescents of female sex had lower odds of compliance when compared to males. |



|  |  |  |                               |                                                    |                                     |                                                                                                                                                              |                                                                                                                                                                                                                                                                             |
|--|--|--|-------------------------------|----------------------------------------------------|-------------------------------------|--------------------------------------------------------------------------------------------------------------------------------------------------------------|-----------------------------------------------------------------------------------------------------------------------------------------------------------------------------------------------------------------------------------------------------------------------------|
|  |  |  | Vaccine adherence/ Compliance | Person's individual characteristics and behaviours | Ethnicity/Race                      | Proportion (%)<br>Hispanic: 13.7<br>Non-Hispanic White: 11.6<br>Non-Hispanic Black: 11.6<br>Non-Hispanic other: 12.1; p=NR                                   | No analyses were performed however, there was numerical difference. Higher vaccine compliance rate was observed among Hispanics when compared to other races/ethnic classes; inequality due to ethnicity/race                                                               |
|  |  |  | Vaccine adherence/ Compliance | Physical environment                               | Geographic location/region          | Proportion (%)<br>Northeast: 16.1<br>Midwest: 11.2<br>South: 10.4<br>West: 12.7; p=NR                                                                        | No analyses were performed however, there was numerical difference. Among Census regions, the lowest MenB vaccine compliance rate was in the South and the highest in the Northeast; inequality due to census region                                                        |
|  |  |  | Vaccine adherence/ Compliance | Social and economic factors                        | Insurance status and type           | OR (95% CI):<br>Private only: Reference<br>Any Medicaid: 1.05 (0.88-1.26); p=0.58<br>Other: 1.48 (1.22-1.79); p<0.001<br>Uninsured: 0.58 (0.4-0.85); p=0.005 | Adolescents having other type of insurance had significantly higher likelihood of compliance, while those who were uninsured had a significantly lower likelihood of compliance compared to those who were privately insured which indicates inequality in compliance rate. |
|  |  |  | Vaccine adherence/ Compliance | Social and economic factors                        | Marital status                      | Proportion (%)<br>Mother's marital status; married: 12.5<br>Mother's marital status; not married: 11.4; p=NR                                                 | Lower vaccine compliance rate was observed among adolescents having unmarried mothers; however, no analyses was performed.                                                                                                                                                  |
|  |  |  | Vaccine adherence/ Compliance | Social and economic factors                        | Number of children <18 in household | OR (95% CI):<br>Number of children <18 in household (ref.: 1)<br>2-3: 1.12 (1.01-1.24); p= 0.031<br>≥4: 1.05 (0.86-1.28); p= 0.622                           | Significantly higher odds of vaccination compliance in households with 2-3 < 18-year-olds compared to households with 1 18 year-old which indicates inequality in vaccine compliance rate.                                                                                  |
|  |  |  | Vaccine adherence/ Compliance | Social and economic factors                        | Wealth                              | Proportion (%)<br>Family income:<br>≤\$30,000: 10.3<br>\$30,001-\$75,000: 10.6<br>>\$75,000: 14.3; p=NR                                                      | Higher vaccine compliance rate was observed among adolescents having family income >\$75,000; however, no analyses was performed.                                                                                                                                           |
|  |  |  | Vaccine adherence/ Compliance | Person's individual characteristics and behaviours | Access to care                      | Proportion (%)<br>Number of visits to healthcare professional in the past year:<br>None: 7.8<br>1: 13.1<br>2-5: 12.9<br>≥6: 12.9; p=NR                       | Higher vaccine compliance rate was observed among adolescents who had made a single visit to the healthcare professional in the past year; however, no analyses was performed.                                                                                              |

|  |  |  |                               |                                                    |                            |                                                                                                                                                                                                 |                                                                                                                                                                                                                                                                                       |
|--|--|--|-------------------------------|----------------------------------------------------|----------------------------|-------------------------------------------------------------------------------------------------------------------------------------------------------------------------------------------------|---------------------------------------------------------------------------------------------------------------------------------------------------------------------------------------------------------------------------------------------------------------------------------------|
|  |  |  | Vaccine adherence/ Compliance | Physical environment                               | Geographic location/region | Proportion (%)<br>Residence in a state with one-dose vaccination mandate by age 15; Yes: 17.8<br>Residence in a state with one-dose vaccination mandate by age 15; No: 9.7; p=NR                | There is an inequality in vaccine compliance rate where a higher vaccine completion rate was observed among adolescents residing in a state with one-dose vaccination mandate by age 15.                                                                                              |
|  |  |  | Vaccine adherence/ Compliance | Physical environment                               | Geographic location/region | Proportion (%)<br>Residence in a state with booster dose vaccination mandate by age 17; Yes: 17<br>Residence in a state with booster dose vaccination mandate by age 17; No: 11.8; p=NR         | Higher vaccine compliance rate was observed among adolescents residing in a state with booster dose vaccination mandate by age 17; however, no analyses was performed.                                                                                                                |
|  |  |  | Vaccine adherence/ Compliance | Person's individual characteristics and behaviours | Access to care             | Proportion (%)<br>Whether teen had a 11–12-year-old well-child exam<br>Yes: 13.0<br>No: 5.2; p=NR                                                                                               | There is an inequality where teens who had a 11–12-year-old well-child exam had a higher vaccine compliance rate.                                                                                                                                                                     |
|  |  |  | Vaccine adherence/ Compliance | Person's individual characteristics and behaviours | Comorbidity                | aOR (95% CI):<br>Asthma history (ref.: No)<br>Yes: 1.17 (1.00-1.37); p=0.044                                                                                                                    | There is an inequality where children with a history of asthma had a significantly higher vaccination compliance rate than those without a history of asthma                                                                                                                          |
|  |  |  | Vaccine adherence/ Compliance | Person's individual characteristics and behaviours | Comorbidity                | OR (95% CI):<br>Any high-risk health conditions (ref.: No)<br>Yes: 1.23 (0.98-1.54); p=0.08                                                                                                     | No association between children with any high-risk health conditions and vaccination compliance rate. There is a numerical inequality where children with any high-risk health conditions had numerically higher vaccination completion rate than those without (not stats performed) |
|  |  |  | Vaccine adherence/ Compliance | Person's individual characteristics and behaviours | Comorbidity                | OR (95% CI):<br>Any high-risk health conditions among household members (ref.: No)<br>Yes: 0.84 (0.76-0.94); p=0.022                                                                            | Significantly higher vaccination compliance if there are any high-risk health conditions among household members which indicates inequality.                                                                                                                                          |
|  |  |  | Vaccine adherence/ Compliance | Social and economic factors                        | Type of healthcare         | OR (95% CI):<br>Facility type of vaccine providers (ref: Public)<br>Private: 1.81 (1.48-2.20); p<0.001<br>Hospital: 1.53 (1.21-1.93); p<0.001<br>Other/Mixed/Unknown: 1.46 (1.19-1.80); p<0.001 | Significantly higher compliance rate for private, hospital, other/mixed/unknown compared to public provider which indicates inequality in vaccination compliance rate.                                                                                                                |
|  |  |  | Vaccine adherence/ Compliance | Social and economic factors                        | Type of healthcare         | Proportion (%)<br>Whether teen's providers report vaccinations to immunisation registry<br>No providers: 10.1<br>Some providers: 10.3                                                           | There is an inequality where vaccination compliance is numerically higher where all providers report vaccinations to immunisation registry compared to no providers                                                                                                                   |

|                                |                 |       |                               |                                                    |                                                                 |                                                                                                                                             |                                                                                                                                                                                                                 |
|--------------------------------|-----------------|-------|-------------------------------|----------------------------------------------------|-----------------------------------------------------------------|---------------------------------------------------------------------------------------------------------------------------------------------|-----------------------------------------------------------------------------------------------------------------------------------------------------------------------------------------------------------------|
|                                |                 |       |                               |                                                    |                                                                 | All providers: 13.7<br>Unknown: 10.4; p=NR                                                                                                  |                                                                                                                                                                                                                 |
|                                |                 |       | Vaccine adherence/ Compliance | Person's individual characteristics and behaviours | Access to care (Up-to-date Hep A vaccine)                       | OR (95% CI):<br>Up-to-date Hep A vaccine<br>Yes: 2.20 (1.87-2.59)<br>No: ref; p <0.001                                                      | Significantly higher compliance rate when teen had up-to-date Hep A vaccine; There is an inequality where a higher vaccination completion rate is observed for teenagers who have up-to-date Hep A vaccination. |
|                                |                 |       | Vaccine adherence/ Compliance | Person's individual characteristics and behaviours | Access to care (Up-to-date Hep B vaccine)                       | Proportion (%)<br>Up-to-date Hep B vaccine<br>Yes: 13.0<br>No: 4.0; p=NR                                                                    | There is a numerical inequality where a higher vaccination completion rate is observed for teenagers who have up-to-date Hep B vaccination.                                                                     |
|                                |                 |       | Vaccine adherence/ Compliance | Person's individual characteristics and behaviours | Access to care (Up-to-date Varicella vaccine)                   | Proportion (%)<br>Up-to-date Varicella vaccine<br>Yes: 14.8<br>No: 4.2; p=NR                                                                | There is a numerical inequality where a higher vaccination completion rate is observed for teenagers who have up-to-date Varicella vaccination                                                                  |
|                                |                 |       | Vaccine adherence/ Compliance | Person's individual characteristics and behaviours | Access to care (Up-to-date HPV vaccine)                         | OR (95% CI):<br>Up-to-date HPV vaccine<br>Yes: 3.18 (2.82-3.6)<br>No: ref; p <0.001                                                         | Significantly higher compliance rate when teen had up-to-date HPV vaccine; There is an inequality where a higher vaccination completion rate is observed for teenagers who have up-to-date HPV vaccination      |
|                                |                 |       | Vaccine adherence/ Compliance | Person's individual characteristics and behaviours | Access to care (Up-to-date Pneumococcal polysaccharide vaccine) | Proportion (%)<br>Up-to-date Pneumococcal polysaccharide vaccine<br>Yes: 25.0<br>No: 11.5; p=NR                                             | There is a numerical inequality where a higher numerical vaccination completion rate is observed for teenagers who have up-to-date pneumococcal polysaccharide vaccination                                      |
|                                |                 |       | Vaccine adherence/ Compliance | Person's individual characteristics and behaviours | Access to care (Up-to-date Tdap vaccine)                        | OR (95% CI):<br>Up-to-date Tdap vaccine<br>Yes: 3.80 (2.75-5.25); p <0.001<br>No: ref                                                       | Significantly higher compliance rate when teen had up-to-date Tdap vaccine; There is an inequality where a higher vaccination completion rate is observed for teenagers who have up-to-date Tdap vaccination    |
|                                |                 |       | Vaccine adherence/ Compliance | Social and economic factors                        | Healthcare expenditure                                          | OR (95% CI):<br>Healthcare expenditures on physician and clinical services per capita (per \$100-unit increase): 1.06 (0.99-1.12); p= 0.075 | Higher numerical compliance rate when teen had a 11–12-year-old well-child exam; however, no association was found.                                                                                             |
|                                |                 |       | Vaccine adherence/ Compliance | Social and economic factors                        | Type of healthcare                                              | OR (95% CI):<br>Proportion of IIS use among adolescents (per 10 percent unit increase): 1.09 (1.02-1.17); p= 0.012                          | Significantly higher compliance rate with increased use of IIS among adolescents which indicates inequality in compliance rate.                                                                                 |
| Ghas walla, 2022 <sup>22</sup> | People aged two | 1,208 | Vaccine uptake                | Person's individual                                | Age                                                             | 2-55 years (reference) vs ≥56 years<br>HR: 0.42; 95% CI: 0.18-0.97; P = 0.04                                                                | Participants aged 56 years or older were associated with a reduced incidence of receipt of the MenACWY vaccine. There was an                                                                                    |

|                               |                                                                                     |                              |                |                                                    |                            |                                                                                                                                                                                                                          |                                                                                                                                                                                                                                                                                                                                                                         |
|-------------------------------|-------------------------------------------------------------------------------------|------------------------------|----------------|----------------------------------------------------|----------------------------|--------------------------------------------------------------------------------------------------------------------------------------------------------------------------------------------------------------------------|-------------------------------------------------------------------------------------------------------------------------------------------------------------------------------------------------------------------------------------------------------------------------------------------------------------------------------------------------------------------------|
|                               | years or older, with a new diagnosis of HIV who were eligible for MenACWY vaccine   |                              |                | characteristics and behaviours                     |                            |                                                                                                                                                                                                                          | inequality in vaccine uptake due to age in patients with a new diagnosis of HIV.                                                                                                                                                                                                                                                                                        |
|                               |                                                                                     |                              | Vaccine uptake | Person's individual characteristics and behaviours | Sex /sexual orientation    | Females (reference) vs males<br>HR: 2.72; 95% CI: 1.18-6.26; P = 0.02                                                                                                                                                    | Male sex was associated with an increased uptake of the MenACWY vaccine. There was an inequality in vaccine uptake due to sex in patients with a new diagnosis of HIV.                                                                                                                                                                                                  |
|                               |                                                                                     |                              |                | Person's individual characteristics and behaviours | Immunosuppressive status   | Attendance at well-care visit vs no attendance<br>HR: 3.67; 95% CI: 1.11-12.12; P = 0.03                                                                                                                                 | Attendance at a well-care visit was associated with an increased uptake of the MenACWY vaccine. There was an inequality in vaccine uptake based on attendance at a well-care visit in individuals with a new diagnosis of HIV.                                                                                                                                          |
|                               |                                                                                     |                              | Vaccine uptake | Physical environment                               | Geographic location/region | South (reference) vs West<br>HR: 2.24; 95% CI: 1.44-3.47; P <0.001                                                                                                                                                       | West geographical location was associated with an increased uptake of the MenACWY vaccine. There was an inequality in vaccine uptake based on region of residence in individuals with a new diagnosis of HIV.                                                                                                                                                           |
|                               |                                                                                     |                              |                |                                                    |                            | South (reference) vs Midwest<br>HR: 1.78; 95% CI: 1.16-2.71; P = 0.008                                                                                                                                                   | Midwest geographical location was associated with an increased uptake of the MenACWY vaccine. There was an inequality in vaccine uptake based on region of residence in individuals with a new diagnosis of HIV.                                                                                                                                                        |
| Ghaswalla, 2021 <sup>37</sup> | Patients with newly diagnosed asplenia and eligible for MenACWY or MenB vaccination | MenACWY: 2,273<br>MenB : 741 | Vaccine uptake | Person's individual characteristics and behaviours | Age                        | HR (95% CI):<br>For MenACWY<br>≥19 years vs 2-10 years: 0.21 (0.14-0.31); p <0.001<br>≥19 years vs 10-18 years: NA<br><br>For MenB<br>≥19 years vs 2-10 years: NA<br>≥19 years vs 10-18 years: 0.34 (0.15-0.79); p=0.013 | Age category ≥19 years was statistically significantly associated with less likelihood of receipt of ≥1 dose of MenACWY (vs 2-10 years)/MenB vaccines (vs 10-18 years); which indicates inequality in vaccination by age.                                                                                                                                               |
|                               |                                                                                     |                              | Vaccine uptake | Physical environment                               | Geographic location/region | HR (95% CI):<br>For MenB<br>Geographic region<br>Midwest (vs Northeast): 1.63 (1.20-2.22); p=0.002<br>Midwest (vs South): NA<br>West (vs South): NA<br><br>For MenB<br>Geographic region<br>Midwest (vs Northeast): NA   | Inequality in vaccination by geographic region; Geographic region was significantly associated with likelihood of receipt of ≥1 dose of MenACWY/MenB vaccines. Individuals in Midwest region had significantly higher odds of likelihood of receipt of ≥1 dose of MenACWY compared to Northeast. Similarly, for MenB vaccines, the likelihood of receipt of ≥1 dose was |

|                |                                                    |                                                        |                                                                                                                                                                                                                                                                                        |                                                                                                                                                                                                                                                                                                                                                                                                                                                                                |                                                                                |
|----------------|----------------------------------------------------|--------------------------------------------------------|----------------------------------------------------------------------------------------------------------------------------------------------------------------------------------------------------------------------------------------------------------------------------------------|--------------------------------------------------------------------------------------------------------------------------------------------------------------------------------------------------------------------------------------------------------------------------------------------------------------------------------------------------------------------------------------------------------------------------------------------------------------------------------|--------------------------------------------------------------------------------|
|                |                                                    |                                                        |                                                                                                                                                                                                                                                                                        | Midwest (vs South): 2.53 (1.19-5.41); p=0.016<br>West (vs South): 2.57 (1.13-5.86); p=0.025                                                                                                                                                                                                                                                                                                                                                                                    | significantly higher in individuals from Midwest and West compared with South. |
| Vaccine uptake | Person's individual characteristics and behaviours | Gender identity/sexual orientation                     | HR (95% CI):<br>For MenACWY<br>Male vs Female: 1.24 (1.05-1.46); p= 0.013<br>For MenB<br>Male vs Female: Not significant                                                                                                                                                               | Inequality in vaccination by sex; Males had significantly higher likelihood of receipt of ≥1 dose of MenACWY vaccine - there was no inequality for MenB.                                                                                                                                                                                                                                                                                                                       |                                                                                |
| Vaccine uptake | Social and economic factors                        | Education level                                        | HR (95% CI):<br>For MenACWY<br>Less than high school diploma/high school diploma (vs some college or associates degree): 0.78 (0.64-0.94); p=0.011<br><br>For MenB<br>Bachelors/graduate degree/professional degree (vs some college or associates degree): 2.24 (1.23-4.09); p= 0.008 | Inequity in vaccination by education; There was a significant difference in likelihood of receipt of ≥1 dose of MenACWY/MenB vaccine; As per univariate analysis, individuals with less than high school diploma/high school diploma (vs some college or associates degree) had less likelihood of receipt of ≥1 dose of MenACWY and Bachelors/graduate degree/professional degree (vs some college or associates degree) had higher likelihood of receipt of ≥1 dose of MenB. |                                                                                |
| Vaccine uptake | Social and economic factors                        | Socioeconomic status                                   | HR (95% CI):<br>For MenACWY<br>Household income < \$40,000 (vs ≥ \$100,000): 0.62 (0.47-0.83); p=0.001                                                                                                                                                                                 | There was a significant difference in likelihood of receipt of ≥1 dose of MenACWY vaccine; As per univariate analysis, individuals with less household income had less likelihood of receipt of ≥1 dose of MenACWY which indicates inequality in vaccination by household income level                                                                                                                                                                                         |                                                                                |
| Vaccine uptake | Social and economic factors                        | Childhood development (Baseline influenza vaccination) | HR (95% CI):<br>For MenACWY: not significant<br>For MenB: 1.94 (1.10-3.43); p=0.023                                                                                                                                                                                                    | Baseline influenza vaccination was significantly associated with receipt of MenB. There is inequality in vaccination by baseline influenza vaccination.                                                                                                                                                                                                                                                                                                                        |                                                                                |
| Vaccine uptake | Social and economic factors                        | Childhood development (Baseline inpatient stay)        | HR (95% CI):<br>For MenACWY: 0.79 (0.66-0.95); p=0.014<br>For MenB: not significant                                                                                                                                                                                                    | Baseline inpatient stay was significantly associated with receipt of MenACWY vaccine which indicates inequality in vaccination by baseline inpatient stay.                                                                                                                                                                                                                                                                                                                     |                                                                                |
| Vaccine uptake | Social and economic factors                        | Childhood development (Baseline office visits)         | HR (95% CI):<br>For MenACWY:<br>1-5 (vs 0): 0.46 (0.30-0.69); p <0.001<br>6-10 (vs 0): 0.40 (0.26-0.62); p <0.001<br>11-20 (vs 0): 0.40 (0.26-0.61); p <0.001                                                                                                                          | Baseline office visits was significantly associated with receipt of MenACWY vaccine. The likelihood of receipt of ≥1 dose of MenACWY decreased with the increase in                                                                                                                                                                                                                                                                                                            |                                                                                |

|                |                             |                                                             |                                                                                                                                                                                                                                                                                               |                                                                                                                                                                                                                                                                                                                                             |                                                                      |
|----------------|-----------------------------|-------------------------------------------------------------|-----------------------------------------------------------------------------------------------------------------------------------------------------------------------------------------------------------------------------------------------------------------------------------------------|---------------------------------------------------------------------------------------------------------------------------------------------------------------------------------------------------------------------------------------------------------------------------------------------------------------------------------------------|----------------------------------------------------------------------|
|                |                             |                                                             |                                                                                                                                                                                                                                                                                               | <p>≥21 (vs 0): 0.50 (0.33-0.76); p =0.001</p> <p>For MenB:<br/> 1–5 (vs 0): not significant<br/> 6–10 (vs 0): not significant<br/> 11–20 (vs 0): not significant<br/> ≥21 (vs 0): not significant</p>                                                                                                                                       | office visits. (Inequality in vaccination by baseline office visits) |
| Vaccine uptake | Social and economic factors | Childhood development (Baseline pharmacy fills)             | <p>HR (95% CI):<br/> For MenACWY:<br/> 14–31 (vs 0–3): not significant<br/> ≥32 (vs 0–3): not significant</p> <p>For MenB:<br/> 14–31 (vs 0–3): 0.28 (0.13-0.63); p=0.002<br/> ≥32 (vs 0–3): 0.22 (0.09-0.55); p=0.001</p>                                                                    | Baseline pharmacy fills was significantly associated with receipt of MenB vaccine. The likelihood of receipt of ≥1 dose of MenB decreased with the increase in pharmacy fills. (Inequality in vaccination by baseline pharmacy fills)                                                                                                       |                                                                      |
| Vaccine uptake | Social and economic factors | Childhood development (Well-care visit)                     | <p>HR (95% CI):<br/> For MenACWY: 6.63 (4.84-9.09); p&lt;0.001<br/> For MenB: 11.17 (3.02-41.26); p&lt;0.001</p>                                                                                                                                                                              | Attending a well-care visit was significantly associated with likelihood of receipt of ≥1 dose of MenACWY or MenB which inequality in vaccination by well-care visit.                                                                                                                                                                       |                                                                      |
| Vaccine uptake | Social and economic factors | Childhood development (PCV13/PPSV 23)                       | <p>HR (95% CI): For MenACWY: 26.02 (21.01-32.22); p&lt;0.001<br/> For MenB: 3.89 (2.07-7.29); p&lt;0.001</p>                                                                                                                                                                                  | Inequality in vaccination by baseline vaccination of PCV13/PPSV23; In multivariable Cox regression, the factors most associated with receipt of MenACWY and MenB were receipt of PCV13 or PPSV23 (HR 26.02; 95% CI 21.01–32.22; HR 3.89; 95% CI 2.07–7.29), respectively.                                                                   |                                                                      |
| Vaccine uptake | Social and economic factors | Childhood development (Baseline all-cause healthcare costs) | <p>HR (95% CI):<br/> For MenACWY:<br/> Baseline all-cause healthcare costs<br/> Medical costs- \$11,769.05–\$54,158.61 (vs \$0–\$2,260.02): 1.77 (1.42-2.23); p&lt;0.001<br/> Total costs (medical + pharmacy)- \$14,774.06–\$59,589.77 (vs \$0–\$3,220.23): 1.59 (1.26-2.00); p&lt;0.001</p> | Inequality in vaccination by Baseline all-cause healthcare costs; In univariable Cox regression analyses, medical costs (HR: 1.77 (1.42–2.23); p<0.001) and total costs (medical + pharmacy) (HR: 1.59 (1.26–2.00); p<0.001) was significantly associated with likelihood of receipt of ≥1 dose of MenACWY. There was no inequity for MenB. |                                                                      |
| Vaccine uptake | Social and economic factors | Childhood development (MenB vaccine receipt)                | <p>HR (95% CI):<br/> For MenACWY: 25.92 (18.54-36.22); p &lt;0.001</p>                                                                                                                                                                                                                        | Inequality in vaccination by receipt of MenB vaccination at baseline; In univariable Cox regression analyses, baseline receipt of MenB vaccination is significantly associated with likelihood of receipt of ≥1 dose of MenACWY.                                                                                                            |                                                                      |

|                            |                    |       |                |                                                    |                                                        |                                                                                                                                                                         |                                                                                                                                                                                                                                                                                           |
|----------------------------|--------------------|-------|----------------|----------------------------------------------------|--------------------------------------------------------|-------------------------------------------------------------------------------------------------------------------------------------------------------------------------|-------------------------------------------------------------------------------------------------------------------------------------------------------------------------------------------------------------------------------------------------------------------------------------------|
|                            |                    |       | Vaccine uptake | Social and economic factors                        | Childhood development (MenACWY vaccine receipt)        | HR (95% CI):<br>For MenB: 10.74 (5.95-19.39); p<0.001                                                                                                                   | Inequality in vaccination by receipt of MenACWY vaccination at baseline; In univariable Cox regression analyses, baseline receipt of MenACWY vaccination is significantly associated with likelihood of receipt of ≥1 dose of MenB                                                        |
| Hansen, 2021 <sup>38</sup> | General population | 7,288 | Vaccine uptake | Person's individual characteristics and behaviours | Gender identity/sexual orientation                     | Unadjusted odds ratio (95% CI):<br>Female: Reference<br>Male: 0.89 (0.68-1.15); p=NR                                                                                    | Sex was not significantly associated with MenB vaccine coverage among adolescents aged 17 years.                                                                                                                                                                                          |
|                            |                    |       | Vaccine uptake | Person's individual characteristics and behaviours | Ethnicity/Race                                         | Unadjusted odds ratio (95% CI):<br>Non-Hispanic White: Reference<br>Hispanic: 1.68 (1.21-2.32)<br>Non-Hispanic Black: 1.22 (0.82-1.83)<br>Other: 1.34 (0.84-2.15); p=NR | Race/ethnicity was significantly associated with MenB vaccine coverage among adolescents aged 17 years, wherein Hispanic adolescents were more likely to have been vaccinated when compared to other ethnic classes which indicates in equality.                                          |
|                            |                    |       | Vaccine uptake | Physical environment                               | Geographic location/region                             | Unadjusted odds ratio (95% CI):<br>Northeast: Reference<br>Midwest: 0.8 (0.61, 1.06)<br>South: 0.76 (0.58, 1)<br>West: 0.91 (0.59, 1.43); p=NR                          | Residing region was not significantly associated with MenB vaccine coverage among adolescents aged 17 years.                                                                                                                                                                              |
|                            |                    |       | Vaccine uptake | Person's individual characteristics and behaviours | Access to care (≥1 healthcare visit in past 12 months) | Unadjusted odds ratio (95% CI):<br>≥1 healthcare visit in past 12 months; Yes: 1.35 (0.87-2.08)<br>≥1 healthcare visit in past 12 months; No: Reference; p=NR           | Having a healthcare visit in the past year was significantly associated with MenB vaccine coverage among adolescents aged 17 years. There is inequality in vaccine coverage, where adolescents who had a healthcare visit in the past year had significantly higher MenB vaccine coverage |
|                            |                    |       | Vaccine uptake | Social and economic factors                        | Insurance status and type                              | aOR (95% CI):<br>Medicaid/other insurance/uninsured: Reference<br>Private insurance: 0.61 (0.46-0.79); p=NR                                                             | Insurance type as not significantly associated with MenB vaccine coverage among adolescents aged 17 years based on a multivariate analysis.                                                                                                                                               |
|                            |                    |       | Vaccine uptake | Person's individual characteristics and behaviours | Chronic health conditions                              | Unadjusted odds ratio (95% CI):<br>Yes: 1.40<br>No: 1.00 (Ref); p=NR                                                                                                    | Presence of chronic conditions was not significantly associated with vaccine uptake                                                                                                                                                                                                       |
|                            |                    |       | Vaccine uptake | Person's individual characteristics and behaviours | Access to care (HPV vaccination)                       | aOR (95% CI):<br>HPV vaccination<br>Yes: 1.74 (1.29-2.35)<br>No: 1.0 (Ref); p=NR                                                                                        | There is an inequality where MenB vaccination is significantly associated with receipt of other vaccines recommended for use in adolescents.                                                                                                                                              |

|                               |                                                                                                                  |     |                |                                                    |                                                     |                                                                                                                                                                                                                                                                                                                             |                                                                                                                                                                                                                                                      |
|-------------------------------|------------------------------------------------------------------------------------------------------------------|-----|----------------|----------------------------------------------------|-----------------------------------------------------|-----------------------------------------------------------------------------------------------------------------------------------------------------------------------------------------------------------------------------------------------------------------------------------------------------------------------------|------------------------------------------------------------------------------------------------------------------------------------------------------------------------------------------------------------------------------------------------------|
|                               |                                                                                                                  |     | Vaccine uptake | Person's individual characteristics and behaviours | Access to care (MenACWY vaccine doses)              | aOR (95% CI):<br>MenACWY Doses<br>0-1: 1.0 (Ref)<br>2: 5.81 (4.14-8.13); p=NR                                                                                                                                                                                                                                               | MenB vaccine receipt remained significantly associated with receipt of 2 MenACWY vaccine doses compared to 0-1 doses. There is an inequality where MenB vaccination is associated with receipt of other vaccines recommended for use in adolescents. |
|                               |                                                                                                                  |     | Vaccine uptake | Person's individual characteristics and behaviours | Access to care (up-to-date Tdap vaccination status) | Unadjusted odds ratio (95% CI):<br>Tdap vaccination:<br>Yes: 1.90 (1.01-3.56)<br>No: 1.0 (Ref); p=NR                                                                                                                                                                                                                        | MenB vaccine receipt remained significantly associated with up-to-date Tdap vaccination status. There is an inequality where MenB vaccination is associated with receipt of other vaccines recommended for use in adolescents                        |
| Hollo way, 2018 <sup>24</sup> | Men who have sex with men (MSM) aged 18 years or older, who might or might not have received the MenACWY vaccine | 350 | Vaccine uptake | Person's individual characteristics and behaviours | Age                                                 | Age group 18-29 (reference) vs age group ≥30<br>Adjusted OR: 2.57; 95% CI: 1.31-5.03; P = 0.006                                                                                                                                                                                                                             | Individuals in the higher age group of ≥30 group were significantly associated with greater MenACWY vaccine uptake compared to the younger age group of 18-29 years. There was an inequality in vaccine uptake due to age in MSM.                    |
|                               |                                                                                                                  |     | Vaccine uptake | Person's individual characteristics and behaviours | Ethnicity/Race                                      | Non-Hispanic White (reference) vs Non-Hispanic Black/African American<br>Adjusted OR: 1.3; 95% CI: 0.51-3.36; P = 0.42<br><br>Non-Hispanic White (reference) vs Hispanic<br>Adjusted OR: 1.53; 95% CI: 0.69-3.38; P = 0.11<br><br>Non-Hispanic White (reference) vs other<br>Adjusted OR: 0.51; 95% CI: 0.18-1.45; P = 0.06 | No association was observed between vaccine uptake and ethnicity/race.                                                                                                                                                                               |
|                               |                                                                                                                  |     | Vaccine uptake | Person's individual characteristics and behaviours | Illegal drug use                                    | No illicit drug use (reference) vs illicit drug use<br>Adjusted OR: 1.21; 95% CI: 0.65-2.24; P = 0.56                                                                                                                                                                                                                       | No association was observed between vaccine uptake and illicit drug use.                                                                                                                                                                             |
|                               |                                                                                                                  |     | Vaccine uptake | Person's individual characteristics and behaviours | Sex /sexual orientation                             | No. of sexual partners in previous 6 months, 0-5 (reference) vs no. of sexual partners in previous 6 months, 6-10<br>Adjusted OR: 0.57; 95% CI: 0.24-1.38; P = 0.33                                                                                                                                                         | No association was observed between vaccine uptake and the number of men with whom the MSM had sex (sexual partners) in previous 6 months.                                                                                                           |
|                               |                                                                                                                  |     | Vaccine uptake | Person's individual characteristics and behaviours | Sex /sexual orientation                             | No. of sexual partners in previous 6 months, 0-5 (reference) vs no. of sexual partners in previous 6 months, ≥11<br>Adjusted OR: 0.8; 95% CI: 0.32-2.01; P = 0.91                                                                                                                                                           |                                                                                                                                                                                                                                                      |
|                               |                                                                                                                  |     | Vaccine uptake | Person's individual                                | Immunosuppressive status                            | HIV status, negative (reference) vs HIV status, Positive                                                                                                                                                                                                                                                                    | No association was observed between vaccine uptake and HIV status.                                                                                                                                                                                   |



|                           |                                                                                                     |       |                |                                                    |                         |                                                                                                                                                                                                                                                                    |                                                                                                                                                                            |
|---------------------------|-----------------------------------------------------------------------------------------------------|-------|----------------|----------------------------------------------------|-------------------------|--------------------------------------------------------------------------------------------------------------------------------------------------------------------------------------------------------------------------------------------------------------------|----------------------------------------------------------------------------------------------------------------------------------------------------------------------------|
|                           |                                                                                                     |       |                | characteristics and behaviours                     |                         | Adjusted OR: 1.12; 95% CI: 0.43-2.91; P = 0.81                                                                                                                                                                                                                     |                                                                                                                                                                            |
|                           |                                                                                                     |       | Vaccine uptake | Social and economic factors                        | Education level         | ≤High school diploma (reference) vs ≥some college<br>Adjusted OR: 0.91; 95% CI: 0.48-1.74; P = 0.77                                                                                                                                                                | No association was observed between vaccine uptake and education level.                                                                                                    |
|                           |                                                                                                     |       | Vaccine uptake | Social and economic factors                        | Wealth                  | Annual household income, <\$20,000 (reference) vs ≥ annual household income, ≥\$20,000<br>Adjusted OR: 0.77; 95% CI: 0.33-1.8; P = 0.54                                                                                                                            | No association was observed between vaccine uptake and annual household income (\$).                                                                                       |
|                           |                                                                                                     |       | Vaccine uptake | Social and economic factors                        | Wealth                  | Resides in Hollywood or West Hollywood (reference) vs does not reside in Hollywood or West Hollywood<br>Adjusted OR: 1.29; 95% CI: 0.67-2.49; P = 0.44                                                                                                             | No association was observed between vaccine uptake and residing region.                                                                                                    |
|                           |                                                                                                     |       |                | Social and economic factors                        | Wealth                  | Resides in a ZIP code where ≥20% of all families were living below the federal poverty level (reference) vs does not reside in a ZIP code where ≥20% of all families were living below the federal poverty level<br>Adjusted OR: 0.97; 95% CI: 0.48-1.93; P = 0.93 | No association was observed between vaccine uptake and residing region.                                                                                                    |
| Huang, 2020 <sup>34</sup> | Individuals who received or did not receive meningococcal MenB vaccine within the previous 6 months | 1,521 | Vaccine uptake | Person's individual characteristics and behaviours | Sex /sexual orientation | Males (reference) vs females<br>OR: 0.840; 95% CI: NR; P = 0.051                                                                                                                                                                                                   | Females were less likely to be vaccinated than males. However, the difference did not quite reach statistical difference.                                                  |
|                           |                                                                                                     |       | Vaccine uptake | Person's individual characteristics and behaviours | Ethnicity/Race          | Non-Hispanic White (reference) vs non-Hispanic Black<br>OR: 0.755; 95% CI: NR; P = 0.026                                                                                                                                                                           | Non-Hispanic Black were significantly less likely to be vaccinated when compared with non-Hispanic White. There was an inequality in vaccine uptake due to race/ethnicity. |
|                           |                                                                                                     |       | Vaccine uptake |                                                    |                         | Non-Hispanic White (reference) vs Hispanic<br>OR: 0.694; 95% CI: NR; P = 0.006                                                                                                                                                                                     | Hispanic were significantly less likely to be vaccinated when compared with non-Hispanic White. There was an inequality in vaccine uptake due to race/ethnicity.           |
|                           |                                                                                                     |       | Vaccine uptake |                                                    |                         | Non-Hispanic White (reference) vs Asian<br>OR: 0.775; 95% CI: NR; P = 0.112                                                                                                                                                                                        | There was not significant difference in vaccine uptake in Asians compared with Non-Hispanic White.                                                                         |
|                           |                                                                                                     |       | Vaccine uptake |                                                    |                         | Non-Hispanic White (reference) vs Other/don't know/NA<br>OR: 0.788; 95% CI: NR; P = 0.173                                                                                                                                                                          | There was not significant difference in vaccine uptake in Other/Unknown races/ethnicities compared with Non-Hispanic White.                                                |
|                           |                                                                                                     |       | Vaccine uptake |                                                    |                         | Physical environment                                                                                                                                                                                                                                               | Housing and household size                                                                                                                                                 |

|                            |                                      |     |                        |                                                    |                           |                                                                                                                                                                                                                                                                                                                                                                                                                                                                                                                                                                                                                                                                                                                                                                                                                                                                                                                                                                                                                                                                                                                                                                                                                     |                                                                                                                                                                                                                                                                                                                                                                        |
|----------------------------|--------------------------------------|-----|------------------------|----------------------------------------------------|---------------------------|---------------------------------------------------------------------------------------------------------------------------------------------------------------------------------------------------------------------------------------------------------------------------------------------------------------------------------------------------------------------------------------------------------------------------------------------------------------------------------------------------------------------------------------------------------------------------------------------------------------------------------------------------------------------------------------------------------------------------------------------------------------------------------------------------------------------------------------------------------------------------------------------------------------------------------------------------------------------------------------------------------------------------------------------------------------------------------------------------------------------------------------------------------------------------------------------------------------------|------------------------------------------------------------------------------------------------------------------------------------------------------------------------------------------------------------------------------------------------------------------------------------------------------------------------------------------------------------------------|
|                            |                                      |     | Vaccine uptake         | Social and economic factors                        | Insurance status and type | 69.4% private/commercially insured, 7.3% in student healthcare plan, 18% in Medicaid, 2.4% in government/ Veterans Affairs hospital, 1.4% not insured, 0.3% in other insurances and 1.1% did not know of the insurance scheme/type                                                                                                                                                                                                                                                                                                                                                                                                                                                                                                                                                                                                                                                                                                                                                                                                                                                                                                                                                                                  | There was an inequality in vaccine uptake due to housing and household size.<br>Proportion of individuals covered under private/commercial insurance had reported to have more vaccine coverage. There was an inequality in vaccine uptake due to insurance status/type.                                                                                               |
| Kemp e, 2018 <sup>52</sup> | Paediatricians and family physicians | 660 | Vaccine recommendation | Person's individual characteristics and behaviours | Age                       | <p>Proportion n (%)</p> <p>Paediatricians</p> <ul style="list-style-type: none"> <li>- Strongly recommend</li> <li>Healthy 11-12 years old: 4</li> <li>Healthy 16-18 years old: 34</li> <li>Healthy adolescents/young adults entering college: 44</li> <li>- Recommend, but not strongly</li> <li>Healthy 11-12 years old: 7</li> <li>Healthy 16-18 years old: 24</li> <li>Healthy adolescents/young adults entering college: 22</li> <li>- Makes no recommendation</li> <li>Healthy 11-12 years old: 81</li> <li>Healthy 16-18 years old: 37</li> <li>Healthy adolescents/young adults entering college: 31</li> <li>- Recommend against</li> <li>Healthy 11-12 years old: 8</li> <li>Healthy 16-18 years old: 5</li> <li>Healthy adolescents/young adults entering college: 4</li> </ul> <p>Family physicians</p> <ul style="list-style-type: none"> <li>- Strongly recommend</li> <li>Healthy 11-12 years old: 18</li> <li>Healthy 16-18 years old: 29</li> <li>Healthy adolescents/young adults entering college: 38</li> <li>- Recommend, but not strongly</li> <li>Healthy 11-12 years old: 15</li> <li>Healthy 16-18 years old: 21</li> <li>Healthy adolescents/young adults entering college: 18</li> </ul> | Numerically higher number of paediatricians and family physicians strongly recommended MenB vaccination in cohort of healthy 16-18 years old and healthy adolescents/young adults entering college than healthy 11-12 years old. (Significance- unknown). Except for 11-12 year olds, paediatricians have a higher rate of strongly recommending vaccination than FPS. |

|                             |                                                                           |                                                           |                        |                                                    |                                    |                                                                                                                                                                                                                                                                                                                                                                                                                                                                                                                                                                                                                                                                                                                                                                                                                                                                                                                                                                                                                                                                                                                                                          |                                                                                                                                                                                                                                                                                                                                   |
|-----------------------------|---------------------------------------------------------------------------|-----------------------------------------------------------|------------------------|----------------------------------------------------|------------------------------------|----------------------------------------------------------------------------------------------------------------------------------------------------------------------------------------------------------------------------------------------------------------------------------------------------------------------------------------------------------------------------------------------------------------------------------------------------------------------------------------------------------------------------------------------------------------------------------------------------------------------------------------------------------------------------------------------------------------------------------------------------------------------------------------------------------------------------------------------------------------------------------------------------------------------------------------------------------------------------------------------------------------------------------------------------------------------------------------------------------------------------------------------------------|-----------------------------------------------------------------------------------------------------------------------------------------------------------------------------------------------------------------------------------------------------------------------------------------------------------------------------------|
|                             |                                                                           |                                                           |                        |                                                    |                                    | <p>- Makes no recommendation<br/>Healthy 11-12 years old: 63<br/>Healthy 16-18 years old: 47<br/>Healthy adolescents/young adults entering college: 42</p> <p>- Recommend against<br/>Healthy 11-12 years old: 4<br/>Healthy 16-18 years old: 3<br/>Healthy adolescents/young adults entering college: 2</p>                                                                                                                                                                                                                                                                                                                                                                                                                                                                                                                                                                                                                                                                                                                                                                                                                                             |                                                                                                                                                                                                                                                                                                                                   |
|                             |                                                                           | 660                                                       | Vaccine recommendation | Person's individual characteristics and behaviours | Immunosuppressive status           | <p>Proportion n (%)</p> <p>Paediatricians</p> <ul style="list-style-type: none"> <li>- Strongly recommend to <math>\geq 10</math> year olds with an increased risk for meningococcal disease: 65</li> <li>- Recommend, but not strongly to <math>\geq 10</math> year olds with an increased risk for meningococcal disease: 16</li> <li>- Makes no recommendation to <math>\geq 10</math> year olds with an increased risk for meningococcal disease: 18</li> <li>- Recommend against to <math>\geq 10</math> year olds with an increased risk for meningococcal disease: 1</li> </ul> <p>Family physicians</p> <ul style="list-style-type: none"> <li>- Strongly recommend to <math>\geq 10</math> year olds with an increased risk for meningococcal disease: 41</li> <li>- Recommend, but not strongly to <math>\geq 10</math> year olds with an increased risk for meningococcal disease: 16</li> <li>- Makes no recommendation to <math>\geq 10</math> year olds with an increased risk for meningococcal disease: 43</li> <li>- Recommend against to <math>\geq 10</math> year olds with an increased risk for meningococcal disease: 0</li> </ul> | Numerically higher number of paediatricians and family physicians strongly recommended MenB vaccination in cohort of $\geq 10$ year olds with an increased risk for meningococcal disease than healthy 11-12 years old. (Significance- unknown). Paediatricians have a higher rate of strongly recommending vaccination than FPs. |
| Kurosky, 2019 <sup>33</sup> | Younger adolescents aged 10.5 through 13 years and older adolescents aged | Commercial Claims and Encounters and Younger adolescents: | Vaccine uptake         | Person's individual characteristics and behaviours | Age                                | For Commercial Claims and Encounters<br>Adjusted odds ratio (95% CI):<br>Younger adolescents: Reference<br>Older adolescents: 0.68 (0.67-0.69); $p < 0.001$                                                                                                                                                                                                                                                                                                                                                                                                                                                                                                                                                                                                                                                                                                                                                                                                                                                                                                                                                                                              | In Commercial Claims and Encounters cohort, older adolescents were significantly associated with a decreased likelihood of receiving MenACWY (negative association). This indicates inequality where older adolescents have a decreased likelihood of receiving MenACWY.                                                          |
|                             |                                                                           |                                                           | Vaccine uptake         | Person's individual characteristics and behaviours | Gender identity/sexual orientation | For Commercial Claims and Encounters<br>Adjusted odds ratio (95% CI):<br>Male: Reference<br>Female: 1.00 (0.99-1.01); $p = \text{NR}$                                                                                                                                                                                                                                                                                                                                                                                                                                                                                                                                                                                                                                                                                                                                                                                                                                                                                                                                                                                                                    | In Commercial Claims and Encounters cohort, sex was not significantly associated with MenACWY vaccination uptake.                                                                                                                                                                                                                 |

|                             |                                                                                                      |                |                                                    |                                                      |                                                                                                                                                                                                                          |                                                                                                                                                                                                                                                                                                    |
|-----------------------------|------------------------------------------------------------------------------------------------------|----------------|----------------------------------------------------|------------------------------------------------------|--------------------------------------------------------------------------------------------------------------------------------------------------------------------------------------------------------------------------|----------------------------------------------------------------------------------------------------------------------------------------------------------------------------------------------------------------------------------------------------------------------------------------------------|
| 15.5 years through 18 years | 376,825 Older adolescents: 419,814 Medicaid: Younger adolescents: 310,383 Older adolescents: 206,301 | Vaccine uptake | Physical environment                               | Geographic location/region                           | For Commercial Claims and Encounters<br>Adjusted odds ratio (95% CI):<br>Northeast: Reference<br>North Central: 1.76 (1.73-1.79)<br>South: 1.79 (1.76-1.82)<br>West: 1.35 (1.32-1.37)<br>Missing/Unknown: 1.53 (1.3-1.8) | In Commercial Claims and Encounters cohort, region other than Northeast was significantly associated with increased likelihood of receiving MenACWY vaccine in younger compared to older adolescents which indicates inequalities in vaccine uptake between young and older adolescents by region. |
|                             |                                                                                                      | Vaccine uptake | Physical environment                               |                                                      | For Commercial Claims and Encounters<br>Adjusted odds ratio (95% CI):<br>Urban: Ref<br>Rural: 0.72<br>Unknown: 0.93                                                                                                      | In Commercial Claims and Encounters cohort, MenACWY uptake was significantly higher in the urban setting than rural setting which indicates inequalities in vaccine uptake as per rurality.                                                                                                        |
|                             |                                                                                                      | Vaccine uptake | Person's individual characteristics and behaviours | Age                                                  | For Medicaid<br>Adjusted odds ratio (95% CI):<br>Younger adolescents: Reference<br>Older adolescents: 0.64 (0.63-0.64); p=NR                                                                                             | In Medicaid cohort, older adolescents were significantly associated with a decreased likelihood of receiving MenACWY which indicates inequalities in vaccine uptake as per age.                                                                                                                    |
|                             |                                                                                                      | Vaccine uptake | Person's individual characteristics and behaviours | Gender identity/sexual orientation                   | For Medicaid<br>Adjusted odds ratio (95% CI):<br>Male: Reference<br>Female: 1.03 (1.02-1.05); p=NR                                                                                                                       | In Medicaid cohort, sex was not significantly associated with MenACWY vaccination uptake                                                                                                                                                                                                           |
|                             |                                                                                                      | Vaccine uptake | Person's individual characteristics and behaviours | Ethnicity/Race                                       | For Medicaid<br>Adjusted odds ratio (95% CI):<br>White: Reference<br>Black: 1.33 (1.31-1.35); p=NR<br>Other known: 1.06 (1.03-1.08); p=NR<br>Unknown: 1.27 (1.17-1.39); p=NR<br>Missing: 1.33 (1.29-1.36); p=NR          | There is an inequality where all non-whites have a higher likelihood of receiving MenACWY vaccination compared to whites.                                                                                                                                                                          |
|                             |                                                                                                      | Vaccine uptake | Physical environment                               | Geographic location/region                           | For Medicaid<br>Adjusted odds ratio (95% CI):<br>Urban: Ref<br>Rural: 0.78 (0.77-0.80); p=NR<br>Unknown: 0.60 (0.44-0.83); p=NR                                                                                          | In Medicaid cohort, no association between vaccine uptake by residential area between the young and older adolescents.                                                                                                                                                                             |
|                             |                                                                                                      | Vaccine uptake | Person's individual characteristics and behaviours | Access to care (Number of preventive care/well-child | For Commercial Claims and Encounters<br>Adjusted odds ratio (95% CI):<br>Number of preventive care/well-child visits (per individual): 1.63 (1.62-1.64); p<0.001                                                         | In Commercial Claims and Encounters cohort, number of preventive care/well-child visit was significantly associated with an increased likelihood for receiving MenACWY. There is an inequality where the greater the number of                                                                     |

|                |                                                    |                                                                             |                                                                                                    |  |                                                                                                                                                                                                                                                                                             |
|----------------|----------------------------------------------------|-----------------------------------------------------------------------------|----------------------------------------------------------------------------------------------------|--|---------------------------------------------------------------------------------------------------------------------------------------------------------------------------------------------------------------------------------------------------------------------------------------------|
|                |                                                    |                                                                             | visits per individual)                                                                             |  | preventive care/well-child visit was associated with an increased likelihood for receiving MenACWY                                                                                                                                                                                          |
| Vaccine uptake | Person's individual characteristics and behaviours | Access to care (Number of outpatient office visits)                         | For Commercial Claims and Encounters<br>Adjusted odds ratio (95% CI):<br>1 (1.00-1.00); p=NR       |  | In Commercial Claims and Encounters cohort, mean number of outpatient office visits were not associated with vaccine uptake,                                                                                                                                                                |
| Vaccine uptake | Person's individual characteristics and behaviours | Access to care (Total number of non-MenACWY vaccines received)              | For Commercial Claims and Encounters<br>Adjusted odds ratio (95% CI):<br>1.38 (1.37-1.38); p<0.001 |  | In Commercial Claims and Encounters cohort, number of non-MenACWY vaccines was significantly associated with an increased likelihood for receiving MenACWY vaccine which indicates inequality.                                                                                              |
| Vaccine uptake | Person's individual characteristics and behaviours | Access to care (Healthcare costs)                                           | For Commercial Claims and Encounters<br>Adjusted odds ratio (95% CI):<br>1 (1.00-1.00); p=NR       |  | In Commercial Claims and Encounters cohort, mean healthcare costs were not associated with vaccine uptake.                                                                                                                                                                                  |
| Vaccine uptake | Person's individual characteristics and behaviours | Access to care (Number of preventive care/well-child visits per individual) | For Medicaid<br>Adjusted odds ratio (95% CI): 1.42 (1.42-1.43);<br>p=NR                            |  | In Medicaid cohort, number of preventive care/well-child visit was associated with an increased likelihood for receiving MenACWY. There is an inequality where the greater the number of preventive care/well-child visit was associated with an increased likelihood for receiving MenACWY |
| Vaccine uptake | Person's individual characteristics and behaviours | Access to care (Number of outpatient office visits)                         | For Medicaid<br>Adjusted odds ratio (95% CI):<br>1 (1.0-1.0); p=NR                                 |  | In Medicaid cohort, mean number of outpatient office visits were not associated with vaccine uptake.                                                                                                                                                                                        |
| Vaccine uptake | Person's individual characteristics and behaviours | Access to care (Total number of non-MenACWY vaccines received)              | For Medicaid<br>Adjusted odds ratio (95% CI):<br>1.56 (1.56-1.57); p=NR                            |  | In Medicaid cohort, mean number of outpatient office visits were numerically higher in older adolescents when compared to younger ones which indicates inequality.                                                                                                                          |
| Vaccine uptake | Person's individual characteristics and behaviours | Access to care (Healthcare costs)                                           | For Medicaid<br>Adjusted odds ratio (95% CI):<br>1 (1.00-1.00); p=NR                               |  | In Medicaid cohort, mean healthcare costs were not associated with vaccine uptake.                                                                                                                                                                                                          |

|                        |                           |      |                |                                                    |                                           |                                                                                                                                                                                                                                                                                                                                                                                                                                                                                                                       |                                                                                                                                                                                                                                                                                                          |
|------------------------|---------------------------|------|----------------|----------------------------------------------------|-------------------------------------------|-----------------------------------------------------------------------------------------------------------------------------------------------------------------------------------------------------------------------------------------------------------------------------------------------------------------------------------------------------------------------------------------------------------------------------------------------------------------------------------------------------------------------|----------------------------------------------------------------------------------------------------------------------------------------------------------------------------------------------------------------------------------------------------------------------------------------------------------|
|                        |                           |      | Vaccine uptake | Social and economic factors                        | Insurance status and type                 | Adjusted odds ratio (95% CI):<br>For Commercial Claims and Encounters<br>Younger adolescents:<br>Comprehensive: 0.85 (0.81-0.88)<br>Exclusive provider organisation: 1.12 (1.07-1.17)<br>Health maintenance organisation: Ref<br>Point of service: 0.87 (0.85-0.89)<br>Preferred provider organisation: 1.02 (1.00-1.04)<br>Point of service with capitation: 1.00 (0.90-1.12)<br>Consumer-directed health plan: 1.21 (1.18-1.24)<br>High deductible health plan: 1.07 (1.04-1.11)<br>Missing: 1.20 (1.15-1.25); p=NR | In Commercial Claims and Encounters cohort, compared to HMO (ref) all health plans except Comprehensive and Point of Service were associated with an increased likelihood of receiving MenACWY vaccine. There is inequality in likelihood of receiving MenACWY vaccine depending on type of health plan. |
|                        |                           |      | Vaccine uptake | Person's individual characteristics and behaviours | Access to care (Attributed Provider Type) | Adjusted odds ratio (95% CI):<br>Family medicine provider: 0.41 (0.41-0.42)<br>Paediatrician: Ref<br>Internal medicine provider: 0.39 (0.38-0.41)<br>Obstetrician/gynaecologist: 0.22 (0.20-0.24)<br>Other provider type: 0.62 (0.61-0.63)<br>No consistent provider: 0.55 (0.55-0.56)<br>p<0.001                                                                                                                                                                                                                     | Attributed provider types other than paediatrician (ref) were significantly associated with a decreased likelihood of receiving MenACWY which indicates inequality in likelihood of receiving MenACWY vaccine.                                                                                           |
| La, 2021 <sup>10</sup> | Adolescents aged 17 years | 7288 | Vaccine uptake | Physical environment                               | Geographic location/region                | Proportion (%):<br>≥1 dose:<br>Northeast: 18.3<br>Midwest: 15.3<br>South: 14.6<br>West: 17<br><br>≥2 doses:<br>Northeast: 9.3<br>Midwest: 7.3<br>South: 6.3<br>West: 7.8; p=NR                                                                                                                                                                                                                                                                                                                                        | Among Census regions, numerically, the lowest MenB vaccine coverage was in the South and the highest in the Northeast. There is an inequality in coverage across regions where the lowest MenB vaccine coverage was in the South and the highest in the Northeast (census regions)                       |
|                        |                           |      | Vaccine uptake | Person's individual characteristics and behaviours | Gender identity/sexual orientation        | Proportion (%):<br>≥1 dose:<br>Male: 15.1<br>Female: 16.8; p=NR                                                                                                                                                                                                                                                                                                                                                                                                                                                       | Numerically, higher vaccination coverage rate was observed for females when compared to males. There is an inequality by sex, where females have a greater coverage than males based on proportions. But there is no significant association in the multivariate analysis                                |

|  |  |  |                |                                                    |                                                  |                                                                                                                                                                                                                                                                                                                   |                                                                                                                                                                                                                                                                |
|--|--|--|----------------|----------------------------------------------------|--------------------------------------------------|-------------------------------------------------------------------------------------------------------------------------------------------------------------------------------------------------------------------------------------------------------------------------------------------------------------------|----------------------------------------------------------------------------------------------------------------------------------------------------------------------------------------------------------------------------------------------------------------|
|  |  |  | Vaccine uptake | Person's individual characteristics and behaviours | Ethnicity/Race                                   | Proportion (%):<br>≥1 dose:<br>Hispanic: 20.8<br>Non-Hispanic White only: 13.5<br>Non-Hispanic Black only: 16.1<br>Non-Hispanic other/multiple races: 17.4; p=NR                                                                                                                                                  | There is an inequality by race/ethnicity where numerically higher vaccination coverage rates observed among adolescents of Hispanic ethnicity when compared to other races/ethnic classes. This was not statistically significant in the multivariate analysis |
|  |  |  | Vaccine uptake | Social and economic factors                        | Wealth                                           | Proportion (%):<br>≥1 dose:<br>Total combined family income, ≤\$25,000: 19.7<br>Total combined family income, \$25,001 to \$50,000: 15.3<br>Total combined family income, \$50,001 to \$75,000: 13<br>Total combined family income, ≥\$75,001: 14.9<br>Total combined family income, Don't know/refused: 19; p=NR | Numerically, higher vaccination coverage rate was observed for adolescents from lower income when compared to higher income categories.                                                                                                                        |
|  |  |  | Vaccine uptake | Social and economic factors                        | Social deprivation                               | Proportion (%):<br>≥1 dose:<br>Family's poverty status, above poverty >\$75,000: 14.9<br>Family's poverty status, above poverty ≤\$75,000: 14.1<br>Family's poverty status, below poverty: 19.6<br>Family's poverty status, unknown<br>Total combined family income, Don't know/refused: 21.7; p=NR               | Irrespective of the group for which poverty level was unknown, numerically, higher vaccination coverage rate was observed for adolescents with a "below poverty" family poverty status.                                                                        |
|  |  |  | Vaccine uptake | Social and economic factors                        | Education level of parents in the case of minors | Proportion (%):<br>≥1 dose:<br>Mother's educational attainment, <12 years: 22<br>Mother's educational attainment, 12 years: 16.5<br>Mother's educational attainment, >12 years; non-college graduate: 14.1<br>Mother's educational attainment, college graduate: 14.9; p=NR                                       | Numerically, higher vaccination coverage rate was observed for adolescents from lower maternal education level families.                                                                                                                                       |
|  |  |  | Vaccine uptake | Social and economic factors                        | Insurance status and type                        | Proportion (%):<br>≥1 dose:<br>Current health insurance status, private only: 13.3<br>Current health insurance status, any Medicaid: 21.9<br>Current health insurance status, other: 12.5                                                                                                                         | Numerically, lower vaccination coverage rate was observed among uninsured adolescents; There is an inequality in vaccination coverage by insurance status where a lower vaccination coverage rate was observed among uninsured adolescents.                    |

|                |                                                    |                                                                                                |                                                                                                                                                                                                                              |                                                                                                                                                                                                                                                                                                                                                                                         |  |
|----------------|----------------------------------------------------|------------------------------------------------------------------------------------------------|------------------------------------------------------------------------------------------------------------------------------------------------------------------------------------------------------------------------------|-----------------------------------------------------------------------------------------------------------------------------------------------------------------------------------------------------------------------------------------------------------------------------------------------------------------------------------------------------------------------------------------|--|
|                |                                                    |                                                                                                |                                                                                                                                                                                                                              | Current health insurance status, uninsured: 10.8; p=NR                                                                                                                                                                                                                                                                                                                                  |  |
| Vaccine uptake | Social and economic factors                        | Insurance status and type                                                                      | Proportion (%):<br>≥1 dose:<br>Never uninsured since age 11 years: 16.2<br>Uninsured at some point since age 11 years: 14.3; p=NR                                                                                            | Numerically, lower vaccination coverage rate was observed among adolescents who got uninsured at some point since age 11 years; There is an inequality in continuity of health insurance coverage where a lower vaccination coverage rate was observed among adolescents who got uninsured at some point since age 11 years.                                                            |  |
| Vaccine uptake | Person's individual characteristics and behaviours | Access to care (Aged 16 or 17 years at last check-up)                                          | Proportion (%):<br>≥1 dose:<br>Yes: 16.8<br>No: 6.9; p=NR                                                                                                                                                                    | Lower vaccination coverage rate was observed among those who had not had a check-up at the age of 16 or 17 years. There is an inequality in vaccination coverage by age of last check-up where a lower vaccination coverage was observed for adolescents who did not have a check-up aged 16 or 17 (This is no longer the case in the multivariate analysis)                            |  |
| Vaccine uptake | Person's individual characteristics and behaviours | Access to care (Number of physician or other healthcare professional visits in past 12 months) | Proportion (%):<br>≥1 dose:<br>Number of physician or other healthcare professional visits in past 12 months;<br>None: 12.7<br>1: 15.9<br>2-3: 16.1<br>4-5: 18<br>6-7: 13.4<br>≥8: 18.5<br>Don't know/refused: 22.3; p=NR    | Numerically, lower vaccination coverage rate was observed among those who had not visited a physician or other healthcare professional in the past 12 months. There is an inequality in vaccine coverage by continuity of care where a lower vaccination coverage rate was observed among those who had not visited a physician or other healthcare professional in the past 12 months. |  |
| Vaccine uptake | Physical environment                               | Geographic location/region                                                                     | Proportion (%):<br>≥1 dose:<br>Pacific: 17.4<br>Mountain: 16.2<br>West North Central: 14.7<br>West South Central: 13<br>East North Central: 15.5<br>East South Central: 8.8<br>Middle Atlantic: 19.7<br>South Atlantic: 17.6 | Numerically, the lowest MenB vaccine coverage was noticed in the East South Central division and the highest estimates in the Middle Atlantic division. There is an inequality in coverage across regions where the lowest MenB vaccine coverage was noticed in the East South Central division and the highest estimates in the Middle Atlantic division.                              |  |



|                |                                                    |                                                       |                                                                                                                                                                                                                       |                                                                                                                                                                                                                                                                                                                                                                    |                                                                                                                                                                                                                                                                                                                       |  |
|----------------|----------------------------------------------------|-------------------------------------------------------|-----------------------------------------------------------------------------------------------------------------------------------------------------------------------------------------------------------------------|--------------------------------------------------------------------------------------------------------------------------------------------------------------------------------------------------------------------------------------------------------------------------------------------------------------------------------------------------------------------|-----------------------------------------------------------------------------------------------------------------------------------------------------------------------------------------------------------------------------------------------------------------------------------------------------------------------|--|
|                |                                                    |                                                       |                                                                                                                                                                                                                       |                                                                                                                                                                                                                                                                                                                                                                    | <p>New England: 14.1</p> <p>≥2 doses, % (95% CI):</p> <p>Pacific: 8.19</p> <p>Mountain: 7</p> <p>West North Central: 7.63</p> <p>West South Central: 4.95</p> <p>East North Central: 7.11</p> <p>East South Central: 2.95</p> <p>Middle Atlantic: 9.85</p> <p>South Atlantic: 8.33</p> <p>New England: 7.72; p=NR</p> |  |
| Vaccine uptake | Person's individual characteristics and behaviours | Gender identity/sexual orientation                    | OR (95% CI):<br>Male: Reference<br>Female: 1.00 (0.76-1.32); p= 0.9879                                                                                                                                                | Sex was not significantly associated with MenB vaccine coverage among adolescents aged 17 years                                                                                                                                                                                                                                                                    |                                                                                                                                                                                                                                                                                                                       |  |
| Vaccine uptake | Person's individual characteristics and behaviours | Ethnicity/Race                                        | OR (95% CI):<br>Non-Hispanic White only: Reference<br>Non-Hispanic Black only: 0.74 (0.48-1.14); p= 0.1784<br>Non-Hispanic other/multiple races: 1.14 (0.71-1.82); p= 0.5912<br>Hispanic: 1.31 (0.92-1.86); p= 0.1355 | Race/ethnicity was not significantly associated with MenB vaccine coverage among adolescents aged 17 years.                                                                                                                                                                                                                                                        |                                                                                                                                                                                                                                                                                                                       |  |
| Vaccine uptake | Social and economic factors                        | Insurance status and type                             | Private insurance: Reference<br>Any Medicaid insurance: 1.77 (1.32-2.39); p=0.0002<br>Other insurance: 1.04 (0.67-1.62); p=0.8469<br>Uninsured: 0.98 (0.56-1.72); p=0.9391                                            | Having a Medicaid insurance was significantly associated with increased vaccination coverage of ≥1 dose of MenB vaccine as compared to those having a private insurance. There is inequality in having the adolescents already been vaccinated based on insurance, where adolescents having a Medicaid insurance were observed to have increased vaccine coverage. |                                                                                                                                                                                                                                                                                                                       |  |
| Vaccine uptake | Person's individual characteristics and behaviours | Access to care (Aged 16 or 17 years at last check-up) | OR (95% CI):<br>Aged 16 or 17 years at last check-up<br>Yes: 1.72 (0.97-3.04); p=0.0645<br>No: Reference                                                                                                              | Age 16 or 17 at last check-up was not significantly associated with coverage                                                                                                                                                                                                                                                                                       |                                                                                                                                                                                                                                                                                                                       |  |
| Vaccine uptake | Person's individual characteristics and behaviours | Previous vaccination status (Up-to-                   | OR (95% CI):<br>Up-to-date with HPV vaccination<br>Yes: 1.94 (1.41-2.67); p<0.0001<br>No: Reference                                                                                                                   | Being up-to-date with other routinely administered vaccines significantly increased the likelihood of receiving MenB vaccination which indicated inequality.                                                                                                                                                                                                       |                                                                                                                                                                                                                                                                                                                       |  |

|  |  |  |                |                                                    |                                                                             |                                                                                                                                                                                                                                                                                                                                                                                                                       |                                                                                                                                                                                                                                                                                                                                                                                                                                                                                |
|--|--|--|----------------|----------------------------------------------------|-----------------------------------------------------------------------------|-----------------------------------------------------------------------------------------------------------------------------------------------------------------------------------------------------------------------------------------------------------------------------------------------------------------------------------------------------------------------------------------------------------------------|--------------------------------------------------------------------------------------------------------------------------------------------------------------------------------------------------------------------------------------------------------------------------------------------------------------------------------------------------------------------------------------------------------------------------------------------------------------------------------|
|  |  |  |                | date with HPV vaccination)                         |                                                                             |                                                                                                                                                                                                                                                                                                                                                                                                                       |                                                                                                                                                                                                                                                                                                                                                                                                                                                                                |
|  |  |  | Vaccine uptake | Person's individual characteristics and behaviours | Previous vaccination status (Up-to-date with MenACWY vaccination)           | OR (95% CI):<br>Up-to-date with MenACWY vaccination<br>Yes: 4.03 (2.92-5.56); p <0.0001<br>No: Reference                                                                                                                                                                                                                                                                                                              | Being up-to-date with other routinely administered vaccines significantly increased the likelihood of receiving MenB vaccination. There is inequality in vaccine coverage, wherein adolescents who were up-to-date with other routinely administered vaccines had an increased likelihood of receiving MenB vaccination.                                                                                                                                                       |
|  |  |  | Vaccine uptake | Person's individual characteristics and behaviours | Previous vaccination status (MenACWY vaccination status at age 11-15 years) | Proportion (%):<br>Vaccinated with ≥1 dose of MenACWY at age 11-15 years: 17.2<br>Not vaccinated with ≥1 dose of MenACWY at age 11-15 years: 10.9; p=NR                                                                                                                                                                                                                                                               | MenB vaccination coverage for ≥1 dose was higher among adolescents vaccinated with ≥1 dose of MenACWY at age 11-15 years compared to those not vaccinated. There is inequality in vaccine coverage, wherein MenB vaccination coverage for ≥1 dose was noticed to be higher among adolescents vaccinated with ≥1 dose of MenACWY at age 11-15 years compared to those not vaccinated                                                                                            |
|  |  |  | Vaccine uptake | Person's individual characteristics and behaviours | Previous vaccination status                                                 | Proportion (%):<br>Vaccinated with ≥1 dose of MenACWY at age 16-17 years: 25.4<br>Not vaccinated with ≥1 dose of MenACWY at age 16-17 years: 4.7; p=NR                                                                                                                                                                                                                                                                | MenB vaccination coverage for ≥1 dose was higher among adolescents vaccinated with ≥1 dose of MenACWY at age 16-17 years compared to those not vaccinated. There is inequality in vaccine coverage, wherein MenB vaccination coverage for ≥1 dose was higher among adolescents vaccinated with ≥1 dose of MenACWY at age 16-17 years compared to those not vaccinated.                                                                                                         |
|  |  |  | Vaccine uptake | Physical environment                               | Geographic location/region                                                  | OR (95% CI):<br>New England: Reference<br>Middle Atlantic: 1.46 (0.95-2.23); p=0.0817<br>East North Central: 1.36 (0.9-2.04); p=0.1437<br>West North Central: 1.48 (0.97-2.24); p=0.0687<br>South Atlantic: 1.9 (1.24-2.92); p=0.0033<br>East South Central: 1 (0.57-1.76); p=0.9927<br>West South Central: 1.16 (0.75-1.79); p=0.5097<br>Mountain: 1.64 (1.03-2.62); p=0.0364<br>Pacific: 1.26 (0.65-2.42); p=0.4935 | Adolescents residing in the South Atlantic or the Mountain census divisions were significantly more likely to have received ≥1 dose of the MenB vaccine than those residing in New England. There is inequity in having the adolescents already been vaccinated based on the census division of residence, where adolescents residing in the South Atlantic or the Mountain census divisions were noticed to have increased vaccine uptake than those residing in New England. |

|                                     |                                                                                                                                                         |                                                                   |                      |                                                             |                                          |                                                                                                                                                                                                                                                                                                                                                                                                                                                                                                                                                                                  |                                                                                                                                                                                                                                                                                                                                                                                                                                                                     |
|-------------------------------------|---------------------------------------------------------------------------------------------------------------------------------------------------------|-------------------------------------------------------------------|----------------------|-------------------------------------------------------------|------------------------------------------|----------------------------------------------------------------------------------------------------------------------------------------------------------------------------------------------------------------------------------------------------------------------------------------------------------------------------------------------------------------------------------------------------------------------------------------------------------------------------------------------------------------------------------------------------------------------------------|---------------------------------------------------------------------------------------------------------------------------------------------------------------------------------------------------------------------------------------------------------------------------------------------------------------------------------------------------------------------------------------------------------------------------------------------------------------------|
| Marsh<br>all,<br>2022 <sup>57</sup> | Patients<br>with<br>comple<br>ment<br>compon<br>ent<br>deficien<br>cies<br>(CDs)<br>and<br>eligible<br>for<br>MenAC<br>WY or<br>MenB<br>vaccinat<br>ion | MenA<br>CWY:<br>1,470<br>MenB<br>: 396                            | Vaccine uptake       | Person's<br>individual<br>characteristics<br>and behaviours | Age                                      | Proportion n/N (%):<br>For MenACWY<br>Age groups<br>2-10 years: 12/106 (11.3)<br>11-18 years: 35/118 (29.7)<br>19-55 years: 14/902 (1.6)<br>≥55 years: 4/344 (1.2)<br><br>For MenB<br>10-18 years: 6/46 (13)<br>≥19 years: 0/350 (0)                                                                                                                                                                                                                                                                                                                                             | Numerically there was inequality in vaccination by age; Vaccination was much more likely among children and adolescents than adults (12/106 [11.3%] among those 2–10 years of age; 35/118 [29.7%] among those 11–18 years; 14/902 [1.6%] among those 19–55 years; and 4/344 [1.2%] among those ≥56 years). The only recipients of MenB vaccination were children and adolescents (6/46 [13.0%] among those 10–18 years of age; 0/350 [0.0%] among those ≥19 years). |
| Packnett,<br>2022 <sup>35</sup>     | Adolescents and young adults with private (Commercial) and Medicaid insurance who initiated MenB vaccination                                            | Com<br>merci<br>al:<br>156,0<br>80<br>Medic<br>aid:<br>57,08<br>2 | Series<br>completion | Person's<br>individual<br>characteristics<br>and behaviours | Gender<br>identity/sexual<br>orientation | Adjusted relative risks (aRRs) (95% CI):<br>For Commercial<br>Female vs Male: 1.02 (1.02-1.03); p<0.001<br><br>For Medicaid<br>Female vs Male: 1.05 (1.03-1.06); p<0.001                                                                                                                                                                                                                                                                                                                                                                                                         | Inequality in vaccination by sex; There was significant difference in completion of a MenB series in both populations across sex; female had significantly higher rates of series completion than males.                                                                                                                                                                                                                                                            |
|                                     |                                                                                                                                                         |                                                                   | Series<br>completion | Person's<br>individual<br>characteristics<br>and behaviours | Age                                      | Adjusted relative risks (aRRs) (95% CI):<br>For Commercial<br>Age (vs 16 years)<br>17 years: 0.86 (0.85-0.87); p <0.001<br>18 years: 0.71 (0.70-0.72); p <0.001<br>19 years: 0.61 (0.60-0.63); p <0.001<br>20 years: 0.58 (0.56-0.60); p <0.001<br>21 years: 0.55 (0.53-0.57); p <0.001<br>22 years: 0.55 (0.52-0.58); p <0.001<br>23 years: 0.57 (0.52-0.62); p <0.001<br><br>For Medicaid<br>Age (vs 16 years)<br>17 years: 0.74 (0.73-0.76); p <0.001<br>18 years: 0.50 (0.48-0.52); p <0.001<br>19 years: 0.55 (0.49-0.62); p <0.001<br>20 years: 0.60 (0.51-0.70); p <0.001 | There was significant difference in completion of a MenB series in both populations as per age; increasing age had significantly lower rates of series completion. (Inequality in vaccination by age)                                                                                                                                                                                                                                                               |

|  |  |  |                   |                                                    |                                                                                                                      |                                                                                                                                                                                                                                                                                                                                                                                                                                                                                                                                  |                                                                                                                                                                                                                                                                                                                                                                     |
|--|--|--|-------------------|----------------------------------------------------|----------------------------------------------------------------------------------------------------------------------|----------------------------------------------------------------------------------------------------------------------------------------------------------------------------------------------------------------------------------------------------------------------------------------------------------------------------------------------------------------------------------------------------------------------------------------------------------------------------------------------------------------------------------|---------------------------------------------------------------------------------------------------------------------------------------------------------------------------------------------------------------------------------------------------------------------------------------------------------------------------------------------------------------------|
|  |  |  |                   |                                                    | 21 years: 0.59 (0.49-0.72); p <0.001<br>22 years: 0.57 (0.45-0.72); p <0.001<br>23 years: 0.43 (0.32-0.57); p <0.001 |                                                                                                                                                                                                                                                                                                                                                                                                                                                                                                                                  |                                                                                                                                                                                                                                                                                                                                                                     |
|  |  |  | Series completion | Physical environment                               | Geographic location/region                                                                                           | Adjusted relative risks (aRRs) (95% CI):<br>For Commercial (not reported for Medicaid)<br>Region (vs New England)<br>Mid-Atlantic: 0.95 (0.93-0.96); p<0.001<br>Pacific: 0.90 (0.88-0.92); p<0.001<br>East North Central: 0.86 (0.84-0.88); p<0.001<br>West North Central: 0.83 (0.81-0.85); p<0.001<br>South Atlantic: 0.79 (0.78-0.81); p<0.001<br>East South Central: 0.79 (0.77-0.81); p<0.001<br>West South Central: 0.76 (0.74-0.78); p<0.001<br>Mountain: 0.75 (0.73-0.78); p<0.001<br>Unknown: 0.75 (0.71-0.80); p<0.001 | There was significant difference in completion of a MenB series as per geography; receipt of first dose outside New England had significantly less rates of series completion. (Inequality in vaccination by geography)                                                                                                                                             |
|  |  |  | Series completion | Physical environment                               | Geographic location/region                                                                                           | Adjusted relative risks (aRRs) (95% CI):<br>For Commercial<br>Region<br>Rural vs Urban/unknown: 0.96 (0.94-0.98); p<0.001<br><br>For Medicaid<br>Region<br>Rural vs Urban/unknown: 0.96 (0.94-0.99); p=0.002                                                                                                                                                                                                                                                                                                                     | There was significant difference in completion of a MenB series as per geography; rural population had significantly lesser rates of series completion than urban populations (Inequality in vaccination by geography).                                                                                                                                             |
|  |  |  | Series completion | Person's individual characteristics and behaviours | Ethnicity/Race                                                                                                       | Adjusted relative risks (aRRs) (95% CI):<br>For Medicaid (Not reported for Commercial)<br>Race<br>Hispanic vs White: 1.01 (0.98-1.05); p=0.44<br>Black vs White: 0.86 (0.84-0.88); p<0.001<br>Other vs White: 1.05 (1.01-1.09); p=0.007<br>Unknown vs White: 1.08 (1.04-1.12); p<0.001                                                                                                                                                                                                                                           | Inequality in vaccination by race; There was significant difference in completion of a MenB series in Medicaid-insured population as per race wherein population with Black race had significantly reduced completion rate while it was significantly greater in unknown or other race cohort vs White. Data were not reported for commercially insured population. |
|  |  |  | Series completion | Social and economic factors                        | Insurance status and type                                                                                            | Proportion (%)<br>Commercial: 56.7<br>Medicaid: 44.7                                                                                                                                                                                                                                                                                                                                                                                                                                                                             | Inequality in vaccination by insurance type; There was a numeric difference in MenB series completion rate as per insurance type; it was higher in commercially insured population than Medicaid.                                                                                                                                                                   |
|  |  |  | Series completion | Person's individual characteristics and behaviours | Access to care (Provider (vs paediatrician))                                                                         | Adjusted relative risks (aRRs) (95% CI):<br>Provider (vs paediatrician)<br>For Commercial<br>Family medicine: 0.88 (0.87-0.89); p<0.001                                                                                                                                                                                                                                                                                                                                                                                          | Inequality in vaccination by vaccine provider; paediatricians had significantly higher completion rates than most other providers, although pharmacists had the highest                                                                                                                                                                                             |

|                   |                                                    |                                                                                   |                                                                                                                                                                                                                                                                                                                                                                                                    |                                                                                                                                                                                                                                                                                                                                                                                                                                                                                                                                                                    |                                                                                               |
|-------------------|----------------------------------------------------|-----------------------------------------------------------------------------------|----------------------------------------------------------------------------------------------------------------------------------------------------------------------------------------------------------------------------------------------------------------------------------------------------------------------------------------------------------------------------------------------------|--------------------------------------------------------------------------------------------------------------------------------------------------------------------------------------------------------------------------------------------------------------------------------------------------------------------------------------------------------------------------------------------------------------------------------------------------------------------------------------------------------------------------------------------------------------------|-----------------------------------------------------------------------------------------------|
|                   |                                                    |                                                                                   |                                                                                                                                                                                                                                                                                                                                                                                                    | <p>Internal medicine: 0.95 (0.92-0.97); p&lt;0.001<br/> Pharmacy: 1.09 (1.05-1.14); p&lt;0.001<br/> Obstetrician/gynaecologist: 0.89 (0.77-1.03); p&lt;0.001<br/> Other: 0.91 (0.89-0.92); p&lt;0.001<br/> Unknown: 0.91 (0.89-0.93); p&lt;0.001</p> <p>For Medicaid<br/> Family medicine: 0.91 (0.87-0.96); p&lt;0.001<br/> Internal medicine: 0.97 (0.86-1.08); p=0.55<br/> Pharmacy: 0.43 (0.30-0.61); p&lt;0.001<br/> Obstetrician/gynaecologist: 0.99 (0.84-1.17); p=0.89<br/> Other: 1.00 (0.98-1.02); p=0.93<br/> Unknown: 0.93 (0.91-0.95); p&lt;0.001</p> | completion rate in the Commercial population, but the lowest rate in the Medicaid population. |
| Series completion | Person's individual characteristics and behaviours | Access to care (Co-administered with index MenB dose (vs none))                   | <p>Adjusted relative risks (aRRs) (95% CI):<br/> For Commercial<br/> MenACWY vaccine: 0.92 (0.91-0.93); p &lt;0.001<br/> Influenza vaccine: 1.02 (1.01-1.04); p=0.005<br/> Other vaccine: 0.89 (0.88-0.90); p &lt;0.001</p> <p>For Medicaid<br/> MenACWY vaccine: 1.03 (1.01-1.05); p=0.005<br/> Influenza vaccine: 1.04 (1.01-1.08); p=0.006<br/> Other vaccine: 0.82 (0.81-0.84); p&lt;0.001</p> | Co-administration of MenACWY/other vaccines were significantly associated with reduced rates of series completion in both Commercial and Medicaid population (Inequality in vaccination by co-administration of vaccines).                                                                                                                                                                                                                                                                                                                                         |                                                                                               |
| Series completion | Person's individual characteristics and behaviours | Access to care (Pre-index vaccine admin visits)                                   | <p>Adjusted relative risks (aRRs) (95% CI):<br/> For Commercial: 1.09 (1.07-1.10); p &lt;0.001<br/> For Medicaid: 1.14 (1.11-1.17); p &lt;0.001</p>                                                                                                                                                                                                                                                | Inequality in vaccination by pre-index vaccine admin visits; Increase in pre-index vaccine admin visits by 1 visit significantly increased the series completion of MenB vaccine in Commercial and Medicaid population.                                                                                                                                                                                                                                                                                                                                            |                                                                                               |
| Series completion | Person's individual characteristics and behaviours | Access to care (Pre-index preventive/well-child visits (per increase of 1 visit)) | <p>Adjusted relative risks (aRRs) (95% CI):<br/> For Commercial: 1.01 (0.99-1.02); p=0.33<br/> For Medicaid: 0.98 (0.97-0.99); p&lt;0.001</p>                                                                                                                                                                                                                                                      | Inequality in vaccination by pre-index preventive/well-child visits; No impact of increase in pre-index preventive/well-child visits on MenB vaccine series completion rate in Commercial population, however, it significantly reduced completion rate in Medicaid populations.                                                                                                                                                                                                                                                                                   |                                                                                               |
| Series completion | Person's individual characteristics and behaviours | Immunosuppressive status (Pre-index HIV (vs no))                                  | <p>Adjusted relative risks (aRRs) (95% CI):<br/> For Commercial: 1.24 (1.05-1.47); p=0.010<br/> For Medicaid: 1.16 (0.78-1.73); p=0.47</p>                                                                                                                                                                                                                                                         | Pre-index HIV was not significantly associated with MenB vaccine series completion rate in Commercial and Medicaid population.                                                                                                                                                                                                                                                                                                                                                                                                                                     |                                                                                               |

|                             |                              |    |                   |                                                    |                                                                              |                                                                                                                                                                                                                                                                                                                                                                                |                                                                                                                                                                                                                                                                                                                                                                                                      |
|-----------------------------|------------------------------|----|-------------------|----------------------------------------------------|------------------------------------------------------------------------------|--------------------------------------------------------------------------------------------------------------------------------------------------------------------------------------------------------------------------------------------------------------------------------------------------------------------------------------------------------------------------------|------------------------------------------------------------------------------------------------------------------------------------------------------------------------------------------------------------------------------------------------------------------------------------------------------------------------------------------------------------------------------------------------------|
|                             |                              |    | Series completion | Social and economic factors                        | Access to care (Pre-index expenditure Per \$1 per person per month increase) | Adjusted relative risks (aRRs) (95% CI):<br>For Commercial: 1.00 (1.00-1.00); p=0.15<br>For Medicaid: 1.00 (1.00-1.00); p=0.18                                                                                                                                                                                                                                                 | Pre-index expenditure (Per \$1 per person per month increase) was not significantly associated with MenB vaccine series completion rate in Commercial and Medicaid population.                                                                                                                                                                                                                       |
| Pingali, 2021 <sup>39</sup> | Adolescents aged 13-17 years | NR | Vaccine uptake    | Person's individual characteristics and behaviours | Age                                                                          | Proportion (%):<br>≥1 dose of MenACWY or meningococcal-unknown type vaccine:<br>Age at interview:<br>13 years: 87.5<br>14 years: 87.6<br>15 years: 90.4<br>16 years: 89.1<br>17 years: 92.3<br><br>≥2 doses of MenACWY or meningococcal-unknown type vaccine:<br>Age at interview:<br>13 years: NA<br>14 years: NA<br>15 years: NA<br>16 years: NA<br>17 years: 54.4<br>p<0.05 | Statistically significant difference (p<0.05) by age was noticed in estimated vaccination coverage, wherein the adolescents aged 15 and 17 years were observed to have increased vaccination coverage. There is inequality due to age in receiving the MenACWY or meningococcal-unknown type vaccine, wherein adolescents aged 15 and 17 years were observed to have increased vaccination coverage. |
|                             |                              |    | Vaccine uptake    | Physical environment                               | Geographic location/region                                                   | Proportion (%):<br>≥1 dose of MenACWY or meningococcal-unknown type vaccine:<br>Metropolitan statistical area:<br>Non-metropolitan statistical area: 85.7<br>Metropolitan statistical area non-principal city: 89.4<br>Metropolitan statistical area principal city: 90.2<br>p<0.05                                                                                            | There is inequality based on the MSA area, wherein adolescents living in non-MSA areas were observed to have lower vaccination coverage when compared with those living in MSA principal cities with ≥1 dose MenACWY or meningococcal-unknown type vaccine                                                                                                                                           |
|                             |                              |    | Vaccine uptake    | Physical environment                               | Geographic location/region                                                   | Proportion (%):<br>≥2 doses of MenACWY or meningococcal-unknown type vaccine:<br>Metropolitan statistical area:<br>Non-metropolitan statistical area: 50.1                                                                                                                                                                                                                     | There is inequality based on the MSA area, wherein adolescents living in MSA non-principal city areas were observed to have higher vaccination coverage when compared with those living in MSA principal cities with                                                                                                                                                                                 |

|  |  |                |                             |                            |                                                                                                                                                                                                                                                                                                                                                                                                                                                                                                                                                                               |                                                                                                                                                                                                                                                                                                                |
|--|--|----------------|-----------------------------|----------------------------|-------------------------------------------------------------------------------------------------------------------------------------------------------------------------------------------------------------------------------------------------------------------------------------------------------------------------------------------------------------------------------------------------------------------------------------------------------------------------------------------------------------------------------------------------------------------------------|----------------------------------------------------------------------------------------------------------------------------------------------------------------------------------------------------------------------------------------------------------------------------------------------------------------|
|  |  |                |                             |                            | Metropolitan statistical area non-principal city: 58.5<br>Metropolitan statistical area principal city: 50.6<br>p<0.05                                                                                                                                                                                                                                                                                                                                                                                                                                                        | ≥2 doses of MenACWY or meningococcal-unknown type vaccine.                                                                                                                                                                                                                                                     |
|  |  | Vaccine uptake | Social and economic factors | Social deprivation         | Proportion (%):<br>≥1 dose of MenACWY or meningococcal-unknown type vaccine:<br>Below poverty level in non-metropolitan statistical area: 86.1<br>Below poverty level in metropolitan statistical area non-principal city: 87.2<br>Below poverty level in metropolitan statistical area principal city: 91.6<br><br>At or above poverty level in non-metropolitan statistical area: 85.6<br>At or above poverty level in metropolitan statistical area non-principal city: 90.2<br>At or above poverty level in metropolitan statistical area principal city: 89.4<br>p<0.05  | There is inequality based on the MSA area with below/at or above poverty level, wherein adolescents living in non-MSA areas were observed to have lower vaccination coverage when compared with those living in MSA principal cities with ≥1 dose MenACWY or meningococcal-unknown type vaccine.               |
|  |  | Vaccine uptake | Social and economic factors | Social deprivation         | Proportion (%):<br>≥2 doses of MenACWY or meningococcal-unknown type vaccine:<br>Below poverty level in non-metropolitan statistical area: 47.4<br>Below poverty level in metropolitan statistical area non-principal city: 47.6<br>Below poverty level in metropolitan statistical area principal city: 48.6<br><br>At or above poverty level in non-metropolitan statistical area: 50.2<br>At or above poverty level in metropolitan statistical area non-principal city: 61.2<br>At or above poverty level in metropolitan statistical area principal city: 50.2<br>p<0.05 | There is inequality based on the MSA area, wherein adolescents living in MSA non-principal city areas with at or above poverty level were observed to have higher vaccination coverage when compared with those living in MSA principal cities with ≥2 doses of MenACWY or meningococcal-unknown type vaccine> |
|  |  | Vaccine uptake | Physical environment        | Geographic location/region | Proportion (%):<br>≥1 dose of MenACWY or meningococcal-unknown type vaccine:                                                                                                                                                                                                                                                                                                                                                                                                                                                                                                  | There is inequality based on the region, wherein statistically significant increase in vaccine coverage was observed for certain                                                                                                                                                                               |

|  |  |  |  |  |                                                                                                                                                                                                                                                                                                                                                                                                                                                                                                                                                                                                                                                                                                                                                                                                                                                                |                                                                                                                   |
|--|--|--|--|--|----------------------------------------------------------------------------------------------------------------------------------------------------------------------------------------------------------------------------------------------------------------------------------------------------------------------------------------------------------------------------------------------------------------------------------------------------------------------------------------------------------------------------------------------------------------------------------------------------------------------------------------------------------------------------------------------------------------------------------------------------------------------------------------------------------------------------------------------------------------|-------------------------------------------------------------------------------------------------------------------|
|  |  |  |  |  | <p>Region I: 95.1<br/> Connecticut: 94.9<br/> Maine: 93.7<br/> Massachusetts: 96.4<br/> New Hampshire: 91.1<br/> Rhode Island: 96.2<br/> Vermont: 91.0</p> <p>Region II: 94.5<br/> New Jersey: 96.2<br/> New York: 93.7<br/> NY–City of New York: 93.2<br/> NY–Rest of State: 94.0</p> <p>Region III: 91.4<br/> Delaware: 89.8<br/> Dist. of Columbia: 91.8<br/> Maryland: 94.0<br/> Pennsylvania: 95.5<br/> PA–Philadelphia: 93.5<br/> PA–Rest of State: 95.7<br/> Virginia: 84.0<br/> West Virginia: 91.4</p> <p>Region IV: 85.7<br/> Alabama: 82.7<br/> Florida: 80.0<br/> Georgia: 96.2<br/> Kentucky: 94.2<br/> Mississippi: 63.5<br/> North Carolina: 94.4<br/> South Carolina: 78.7<br/> Tennessee: 83.2</p> <p>Region V: 93.6<br/> Illinois: 92.5<br/> IL–City of Chicago: 89.7<br/> IL–Rest of State: 93.0<br/> Indiana: 94.9<br/> Michigan: 95.7</p> | <p>regions namely, New Jersey, Minnesota, Texas, Texas-Rest of the state, South Dakota when compared to 2019.</p> |
|--|--|--|--|--|----------------------------------------------------------------------------------------------------------------------------------------------------------------------------------------------------------------------------------------------------------------------------------------------------------------------------------------------------------------------------------------------------------------------------------------------------------------------------------------------------------------------------------------------------------------------------------------------------------------------------------------------------------------------------------------------------------------------------------------------------------------------------------------------------------------------------------------------------------------|-------------------------------------------------------------------------------------------------------------------|



|  |  |  |  |  |                                                                                                                                                                                                                                                                                                                                                                                                                                                                                                                                                                                                                                                                                                                       |  |
|--|--|--|--|--|-----------------------------------------------------------------------------------------------------------------------------------------------------------------------------------------------------------------------------------------------------------------------------------------------------------------------------------------------------------------------------------------------------------------------------------------------------------------------------------------------------------------------------------------------------------------------------------------------------------------------------------------------------------------------------------------------------------------------|--|
|  |  |  |  |  | <p>Minnesota: 94.3<br/>Ohio: 93.4<br/>Wisconsin: 90.2</p> <p>Region VI: 90.0<br/>Arkansas: 93.8<br/>Louisiana: 90.1<br/>New Mexico: 85.2<br/>Oklahoma: 80.0<br/>Texas: 91.2<br/>TX–Bexar County: 90.6<br/>TX–City of Houston: 89.2<br/>TX–Rest of State: 91.4</p> <p>Region VII: 86.4<br/>Iowa: 90.7 (86.1–93.9)<br/>Kansas: 83.3<br/>Missouri: 85.3<br/>Nebraska: 87.3</p> <p>Region VIII: 87.6<br/>Colorado: 87.3<br/>Montana: 75.8<br/>North Dakota: 93.8<br/>South Dakota: 94.2<br/>Utah: 90.3<br/>Wyoming: 73.3</p> <p>Region IX: 85.5<br/>Arizona: 87.3<br/>California: 85.0<br/>Hawaii: 86.0<br/>Nevada: 87.2</p> <p>Region X: 87.4<br/>Alaska: 77.7<br/>Idaho: 88.7<br/>Oregon: 87.5<br/>Washington: 88.1</p> |  |
|--|--|--|--|--|-----------------------------------------------------------------------------------------------------------------------------------------------------------------------------------------------------------------------------------------------------------------------------------------------------------------------------------------------------------------------------------------------------------------------------------------------------------------------------------------------------------------------------------------------------------------------------------------------------------------------------------------------------------------------------------------------------------------------|--|

|  |  |  |                |                                                    |                                                        |                                                                                                                                                                                                                                                                                                       |                                                                                                                                                                                                                                      |
|--|--|--|----------------|----------------------------------------------------|--------------------------------------------------------|-------------------------------------------------------------------------------------------------------------------------------------------------------------------------------------------------------------------------------------------------------------------------------------------------------|--------------------------------------------------------------------------------------------------------------------------------------------------------------------------------------------------------------------------------------|
|  |  |  |                |                                                    | Territory<br>Guam: 70.4<br>Puerto Rico: 77.2<br>p<0.05 |                                                                                                                                                                                                                                                                                                       |                                                                                                                                                                                                                                      |
|  |  |  | Vaccine uptake | Person's individual characteristics and behaviours | Ethnicity/Race                                         | Proportion (%):<br>≥1 dose of MenACWY or meningococcal-unknown type vaccine:<br>Non-Hispanic, White only: 89.3<br>Non-Hispanic, Black only: 89.4<br>Hispanic: 89.2<br>Non-Hispanic, American Indian/Alaska Native only: 93.3<br>Non-Hispanic, Asian: 89.2<br>Non-Hispanic, Multiracial: 89.9<br>P=NR  | No analyses were performed.                                                                                                                                                                                                          |
|  |  |  | Vaccine uptake | Person's individual characteristics and behaviours | Ethnicity/Race                                         | Proportion (%):<br>≥2 doses of MenACWY or meningococcal-unknown type vaccine:<br>Non-Hispanic, White only: 58<br>Non-Hispanic, Black only: 46.8<br>Hispanic: 52.5<br>Non-Hispanic, American Indian/Alaska Native only: 63.8<br>Non-Hispanic, Asian: 51.9<br>Non-Hispanic, Multiracial: 47.5<br>p<0.05 | There is inequality based on the race/ethnicity, wherein vaccination coverage was lower among non-Hispanic, Black adolescents compared with non-Hispanic, White ones with ≥2 doses of MenACWY or meningococcal-unknown type vaccine. |
|  |  |  | Vaccine uptake | Social and economic factors                        | Insurance status and type                              | Proportion (%):<br>≥1 dose of MenACWY or meningococcal-unknown type vaccine:<br>Private insurance only: 90.2<br>Any Medicaid: 88.6<br>Other insurance: 89<br>Uninsured: 85.5<br>p<0.05                                                                                                                | There is an inequality in vaccination coverage by insurance status where lower vaccination coverage was observed among uninsured adolescents.                                                                                        |
|  |  |  | Vaccine uptake | Social and economic factors                        | Insurance status and type                              | Proportion (%):<br>≥2 doses of MenACWY or meningococcal-unknown type vaccine:<br>Private insurance only: 58.1<br>Any Medicaid: 50.6<br>Other insurance: 54.3                                                                                                                                          | There is an inequality in vaccination coverage by insurance status where lower vaccination coverage was observed among uninsured adolescents.                                                                                        |

|                                       |                                                                                                                                                     |                                                                                                                                   |                |                                                             |                                          |                                                                                                    |                                                                                                                                                                                                                                                                                       |
|---------------------------------------|-----------------------------------------------------------------------------------------------------------------------------------------------------|-----------------------------------------------------------------------------------------------------------------------------------|----------------|-------------------------------------------------------------|------------------------------------------|----------------------------------------------------------------------------------------------------|---------------------------------------------------------------------------------------------------------------------------------------------------------------------------------------------------------------------------------------------------------------------------------------|
|                                       |                                                                                                                                                     |                                                                                                                                   |                |                                                             |                                          | Uninsured: 35.5<br>p<0.05                                                                          |                                                                                                                                                                                                                                                                                       |
| Srivas<br>tava,<br>2020 <sup>36</sup> | Adult<br>parents<br>or<br>guardia<br>ns (aged<br>within<br>the<br>range of<br>35-≥ 65<br>years)<br>of ≥1<br>depende<br>nt aged<br>16 to 19<br>years | 619<br>(Awar<br>e<br>versus<br>not<br>aware<br>of<br>MenB<br>vaccin<br>es)                                                        | Vaccine uptake | Person's<br>individual<br>characteristics<br>and behaviours | Gender<br>identity/sexual<br>orientation | Females (reference) vs males<br>OR: 0.43; 95% CI: 0.26-0.7                                         | Sex was significantly associated with reduced MenB vaccine awareness, indicating male parents/guardians were mostly not aware of the MenB vaccines. There was an inequality in vaccine uptake due to sex in parents/guardians.                                                        |
|                                       |                                                                                                                                                     | 619<br>(Awar<br>e<br>versus<br>not<br>aware<br>of<br>MenB<br>vaccin<br>es)<br>155<br>(Not<br>Aware<br>of<br>MenB<br>Vacci<br>nes) | Vaccine uptake | Person's<br>individual<br>characteristics<br>and behaviours | Ethnicity/Race                           | Black and others, non-Hispanic (reference) vs<br>White, non-Hispanic<br>OR: 2.2; 95% CI: 1.09-4.46 | Race/ethnicity was significantly associated with MenB vaccine awareness, indicating White, non-Hispanic parents/guardians were more aware of MenB vaccines than Black and others, non-Hispanic. There was an inequality in vaccine uptake due to race/ethnicity in parents/guardians. |
|                                       |                                                                                                                                                     | NR<br>(Una<br>ware<br>but<br>interes<br>ted<br>versus<br>unawa<br>re and<br>not                                                   | Vaccine uptake | Person's<br>individual<br>characteristics<br>and behaviours | Ethnicity/Race                           | Black and others, non-Hispanic (reference) vs<br>Hispanic<br>OR: 5.05; 95% CI: 1.13-22.63          | Race/ethnicity was significantly associated with MenB vaccine awareness, indicating Hispanic parents/guardians were more interested in vaccination than Black and others, non-Hispanic. There was an inequality in vaccine uptake due to race/ethnicity in parents/guardians.         |

|  |  |                                                                                |                |                             |                           |                                                                                                                                                                         |                                                                                                                                                                                                                                                      |
|--|--|--------------------------------------------------------------------------------|----------------|-----------------------------|---------------------------|-------------------------------------------------------------------------------------------------------------------------------------------------------------------------|------------------------------------------------------------------------------------------------------------------------------------------------------------------------------------------------------------------------------------------------------|
|  |  | interested)                                                                    |                |                             |                           |                                                                                                                                                                         |                                                                                                                                                                                                                                                      |
|  |  | 619 (Aware versus not aware of MenB vaccines) 155 (Not Aware of MenB Vaccines) | Vaccine uptake | Social and economic factors | Childhood development     | Whether parents felt the HCP knew their child well (yes vs no)<br>OR: 0.53; 95% CI: 0.30-0.96                                                                           | Whether parents felt the HCP knew their child well (yes vs no) was significantly associated with MenB vaccine awareness/interest. There was an inequality in vaccine uptake based on whether parents felt the HCP knew their child well (yes vs no). |
|  |  | 312 (Aware of and Vaccinated/Intend to Vaccinate)                              | Vaccine uptake | Social and economic factors | Insurance status and type | No insurance (reference) vs employer-based insurance<br>OR: 3.34; 95% CI: 1.09-10.21<br><br>No insurance (reference) vs other insurance<br>OR: 3.66; 95% CI: 1.06-12.66 | Parents/guardians having some form of insurance had higher proportions of adolescents who were vaccinated. There was an inequality in vaccine uptake based on the insurance status of parents/guardians.                                             |
